# Supplementary material
Source: publisher figshare collection journal article supplement (https://acs.figshare.com/ndownloader/files/4383658)
Supplement: Supplementary file 1 [file 4383658]

# Catalytic Asymmetric Formal [4+1] Annulation Leading to Optically Active *cis*-Isoxazoline *N*-Oxides

## SUPPORTING INFORMATION

Zugui Shi, Bin Tan, Wendy Wen Yi Leong, Xiaofei Zeng, Min Lu, and Guofu Zhong\*

Division of Chemistry and Biological Chemistry, School of Physical and Mathematical Sciences, Nanyang Technological University, 21 Nanyang Link, Singapore 637371, Singapore

## INDEX

|                                                                                     |     |
|-------------------------------------------------------------------------------------|-----|
| I. General Information .....                                                        | S2  |
| II. Optimization and general procedure of catalytic [4+1] annulation reaction ..... | S2  |
| III. NMR and HPLC data .....                                                        | S6  |
| IV. Absolute configuration assignments.....                                         | S18 |
| V. References.....                                                                  | S19 |
| VI. <sup>1</sup> H and <sup>13</sup> C NMR spectra.....                             | S20 |
| VII. HPLC spectra of products.....                                                  | S44 |

## I. General Information

Analytical thin layer chromatography (TLC) was performed using Merck 60 F254 precoated silica gel plate (0.2 mm thickness). Subsequent to elution, plates were visualized using UV radiation (254 nm) on Spectroline Model ENF-24061/F 254 nm. Further visualization was possible by staining with basic solution of potassium permanganate or acidic solution of ceric molybdate.

Flash column chromatography was performed using Merck silica gel 60 with freshly distilled solvents. Columns were typically packed as slurry and equilibrated with the appropriate solvent system prior to use. Proton nuclear magnetic resonance spectra ( $^1\text{H}$ -NMR) were recorded on Bruker AMX 400 spectrophotometer ( $\text{CDCl}_3$  as solvent). Chemical shifts for  $^1\text{H}$  NMR spectra are reported as  $\delta$  in units of parts per million (ppm) downfield from  $\text{SiMe}_4$  ( $\delta$  0.0) and relative to the signal of chloroform-d ( $\delta$  7.26, singlet). Multiplicities were given as: s (singlet), d (doublet), t (triplet), dd (doublets of doublet) or m (multiplets). The number of protons (n) for a given resonance is indicated by nH. Coupling constants are reported as a  $J$  value in Hz. Carbon nuclear magnetic resonance spectra ( $^{13}\text{C}$ -NMR) are reported as  $\delta$  in units of parts per million (ppm) downfield from  $\text{SiMe}_4$  ( $\delta$  0.0) and relative to the signal of chloroform-d ( $\delta$  77.0, triplet).

Enantioselectivities were determined by High Performance Liquid Chromatography (HPLC) analysis (Shimadzu, LC-20AD) employing a Chiralcel OD-H or AD-H. Optical rotations were measured in  $\text{CHCl}_3$  on a Schmidt + Haensch polarimeter (Polartronic MH8) with a 10 cm cell (c given in g/100 mL).

High resolution mass spectrometry (HRMS) was recorded on Finnigan MAT 95  $\times$  P spectrometer.

$\alpha$ -Iodoaldehyde<sup>1</sup> and 2-nitroacrylate<sup>2</sup> substrates were prepared according to the procedure of literatures, catalyst **4a**,<sup>3</sup> **4b**,<sup>3</sup> **4c**,<sup>3</sup> **4d**<sup>4</sup> and **4f**<sup>5</sup> were synthesized following documented methods. Catalyst **4e**,<sup>6</sup> **4g**,<sup>6</sup> **4h**<sup>7</sup> and **4i**<sup>5</sup> were prepared with modified method of literatures.

## II. General procedure of catalytic [4+1] annulation reaction

$\alpha$ -Iodoaldehyde (0.8 mmol, 4.0 equivalent), (S)-2-(azidodiphenylmethyl)pyrrolidine (**4e**, 0.04 mmol, 0.2 equivalent) were dissolved in 2.0 mL toluene at room temperature (23  $^\circ\text{C}$ ), then 2-Nitroacrylate derivatives (0.2 mmol) and triethyl amine (0.22 mmol) were added successively. The reaction progress was monitored by TLC analysis. Upon consumption of 2-nitroacrylate

derivatives, the crude reaction mixture was applied to silica gel and the desired products were obtained by flash chromatography (hexane/ethyl acetate, 10:1 to 2:1).

Racemic adducts were synthesized using 2-(diphenyl(trimethylsilyloxy)methyl)pyrrolidine as catalyst.

## Optimization of reaction conditions

### 1) Catalyst screening

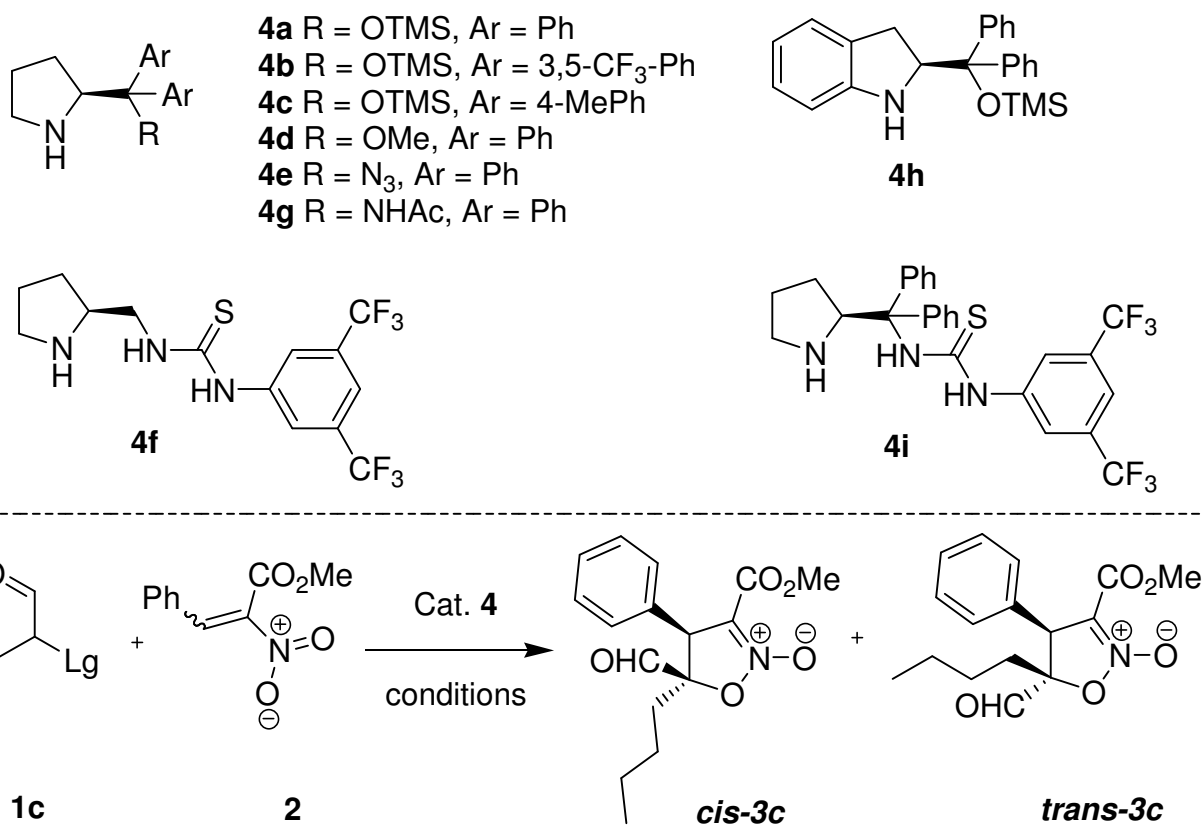

| entry | <b>4</b>  | Lg | solvent | additive | <i>t</i> (h) | yield (%) <sup>b</sup> | <i>cis/trans</i> <sup>c</sup> | <i>ee</i> (%) <sup>d</sup> |
|-------|-----------|----|---------|----------|--------------|------------------------|-------------------------------|----------------------------|
| 1     | <b>4a</b> | Cl | TBME    | DIPEA    | 48           | 50                     | 1:1.4                         | 70                         |
| 2     | <b>4b</b> | Cl | TBME    | DIPEA    | 96           | 18                     | n.d.                          | 0                          |
| 3     | <b>4a</b> | Br | TBME    | DIPEA    | 24           | 90                     | 1.3:1                         | 99                         |
| 4     | <b>4a</b> | I  | TBME    | DIPEA    | 5            | 79                     | 1.8:1                         | 96                         |
| 5     | <b>4a</b> | I  | toluene | DIPEA    | 5            | 77                     | 4.5:1                         | 96                         |
| 6     | <b>4c</b> | I  | toluene | DIPEA    | 5            | 78                     | 2.2:1                         | 95                         |
| 7     | <b>4d</b> | I  | toluene | DIPEA    | 3            | 60                     | 6:1                           | 95                         |
| 8     | <b>4e</b> | I  | toluene | DIPEA    | 7            | 83                     | 9:1                           | 98                         |
| 9     | <b>4f</b> | I  | toluene | DIPEA    | 24           | 20                     | 3:1                           | n.d.                       |
| 10    | <b>4g</b> | I  | toluene | DIPEA    | 24           | n.d.                   | n.d.                          | n.d.                       |
| 11    | <b>4h</b> | I  | toluene | DIPEA    | 24           | n.d.                   | n.d.                          | n.d.                       |
| 12    | <b>4i</b> | I  | toluene | DIPEA    | 24           | n.d.                   | n.d.                          | n.d.                       |

<sup>a</sup> Unless noted, reactions were performed at rt on a 0.1 mmol scale, in 0.5 mL toluene, with a molar ratio of  $\alpha$ -iodohexanal/2-nitroacrylate/DIPEA/**4** = 4:1:1.1:0.2. <sup>b</sup> The sum of both isomers. <sup>c</sup> Analysis of crude <sup>1</sup>H NMR. <sup>d</sup> Determined by HPLC for *cis*-isomer. n.r.= no reaction, n.d.= no determination.

## 2) Survey of additive

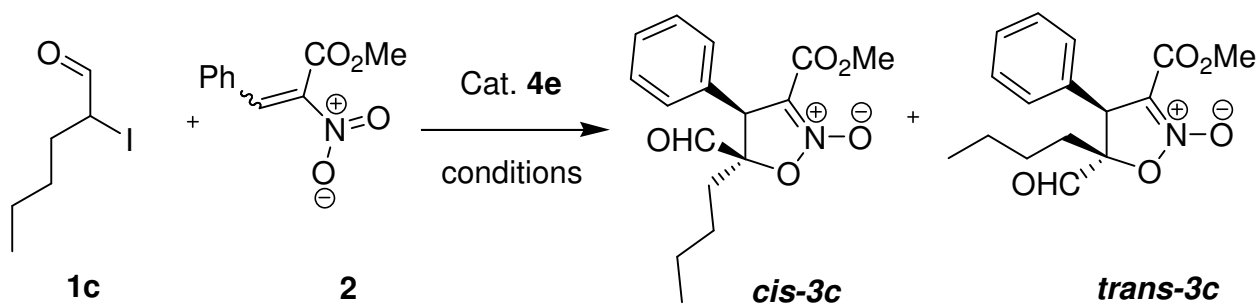

| entry          | additive     | <i>t</i> (h) | yield (%) <sup>b</sup> | <i>cis/trans</i> <sup>c</sup> | <i>ee</i> (%) <sup>d</sup> |
|----------------|--------------|--------------|------------------------|-------------------------------|----------------------------|
| 1              | DIPEA        | 7            | 83                     | 9:1                           | 98                         |
| 2              | TEA          | 8            | 89                     | 11:1                          | >99                        |
| 3              | 2,6-lutidine | 48           | 85                     | 7:1                           | 96                         |
| 4              | NaOAc        | 48           | n.r.                   | n.d.                          | n.d.                       |
| 5              | Pyridine     | 48           | 47                     | 8:1                           | 96                         |
| 6              | DABCO        | 48           | 20                     | 11:1                          | 97                         |
| 7 <sup>e</sup> | TEA          | 10           | 80                     | 11:1                          | >99                        |

<sup>a</sup> Unless noted, reactions were performed at rt on a 0.1 mmol scale, in 0.5 mL toluene, with a molar ratio of  $\alpha$ -iodohexanal/2-nitroacrylate/additive/**4** = 4:1:1.1:0.2. <sup>b</sup> The sum of both isomers. <sup>c</sup> Analysis of crude <sup>1</sup>H NMR. <sup>d</sup> Determined by HPLC for *cis*-isomer. <sup>e</sup> 1.0 equivalent TEA was employed. n.r.= no reaction, n.d.= no determination.

## 3) Concentration effect

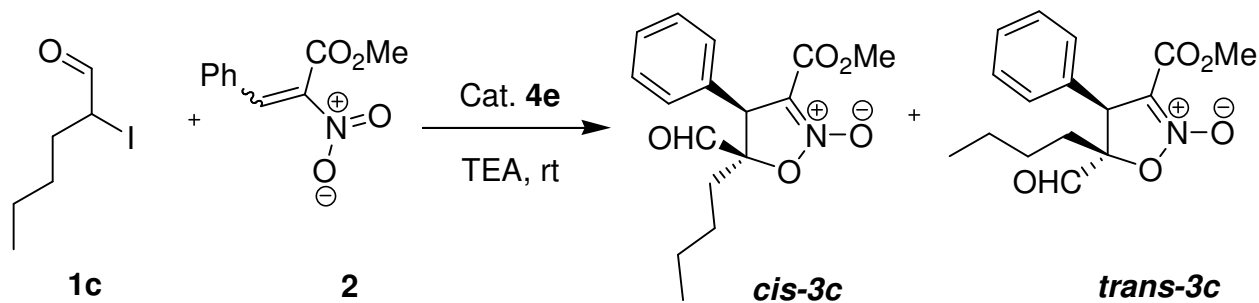

| entry | M <b>2</b> | <i>t</i> (h) | yield (%) <sup>b</sup> | <i>cis/trans</i> <sup>c</sup> | <i>ee</i> (%) <sup>d</sup> |
|-------|------------|--------------|------------------------|-------------------------------|----------------------------|
| 1     | 0.5        | 8            | 89                     | 11:1                          | >99                        |
| 2     | 0.2        | 14           | 94                     | 11:1                          | >99                        |

<sup>a</sup> Unless noted, reactions were performed at rt on a 0.1mmol scale, in toluene, with a molar ratio of  $\alpha$ -iodohexanal/2-nitroacrylate/TEA/**4** = 4:1:1.1:0.2. <sup>b</sup> The sum of both isomers. <sup>c</sup> Analysis of crude <sup>1</sup>H NMR. <sup>d</sup> Determined by HPLC for *cis*-isomer.

#### 4) Solvent effect

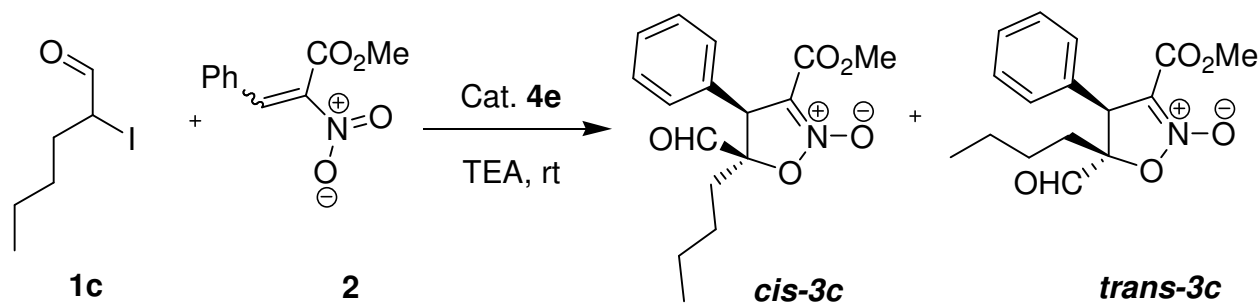

| entry | solvent  | <i>t</i> (h) | yield (%) <sup>b</sup> | <i>cis/trans</i> <sup>c</sup> | <i>ee</i> (%) <sup>d</sup> |
|-------|----------|--------------|------------------------|-------------------------------|----------------------------|
| 1     | toluene  | 14           | 94                     | 11:1                          | >99                        |
| 2     | benzene  | 14           | 82                     | 11:1                          | >99                        |
| 3     | m-xylene | 21           | 72                     | 13:1                          | 98                         |
| 4     | TBME     | 14           | 61                     | 9:1                           | 99                         |

<sup>a</sup> Unless noted, reactions were performed at rt on a 0.1 mmol scale, at 0.1 M concentration, with a molar ratio of  $\alpha$ -iodohexanal/2-nitroacrylate/TEA/**4** = 4:1:1.1:0.2. <sup>b</sup> The sum of both isomers. <sup>c</sup> Analysis of crude <sup>1</sup>H NMR. <sup>d</sup> Determined by HPLC for *cis*-isomer.

#### 5) Catalyst loading and temperature effect

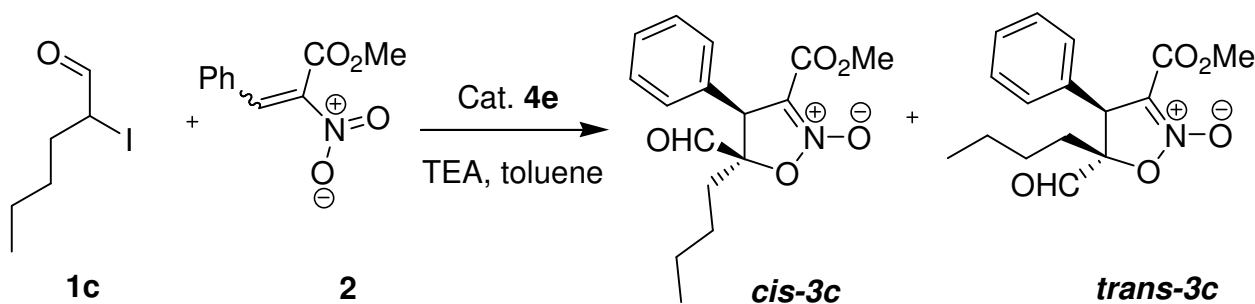

| entry | mol % of <b>4e</b> | T (°C) | <i>t</i> (h) | yield (%) <sup>b</sup> | <i>cis/trans</i> <sup>c</sup> | <i>ee</i> (%) <sup>d</sup> |
|-------|--------------------|--------|--------------|------------------------|-------------------------------|----------------------------|
| 1     | 20                 | 23     | 14           | 94                     | 11:1                          | >99                        |
| 2     | 10                 | 23     | 23           | 69                     | 9:1                           | 99                         |
| 3     | 20                 | 0      | 48           | n.r.                   | n.d.                          | n.d.                       |
| 4     | 20                 | 30     | 24           | 92                     | 7:1                           | 95                         |
| 5     | 10                 | 30     | 24           | 62                     | 10:1                          | 95                         |

<sup>a</sup> Unless noted, reactions were performed at rt on a 0.1 mmol scale, at 0.1 M concentration, with a molar ratio of  $\alpha$ -iodohexanal/2-nitroacrylate/TEA/**4** = 4:1:1.1:0.2. <sup>b</sup> The sum of both isomers. <sup>c</sup> Analysis of crude <sup>1</sup>H NMR. <sup>d</sup> Determined by HPLC for *cis*-isomer. n.r.= no reaction, n.d.= no determination.

### III. NMR and HPLC data

#### (*S*)-2-(Azidodiphenylmethyl)pyrrolidine (**4e**)

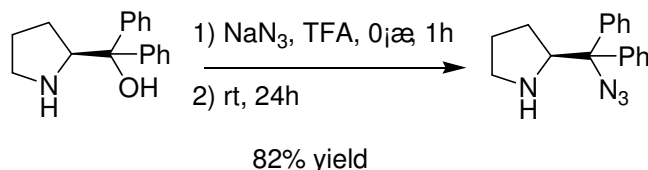

Catalyst **4e** was synthesized using modified method of literature:<sup>6</sup> (*S*)-Diphenyl(pyrrolidin-2-yl)methanol (0.81 g, 3.2 mmol) was dissolved in 20 mL TFA, then cooled with ice bath. NaN<sub>3</sub> (1.25 g, 19.2 mmol) was portionwise added, then stirred at room temperature for 24 h. Reaction was quenched with saturated aqueous Na<sub>2</sub>CO<sub>3</sub> solution, extracted with dichloromethane, dried over Na<sub>2</sub>SO<sub>4</sub>, concentrated under vacuo, then the residue was applied to column chromatography, gave 0.73 g solid product (Mp: 70-71 °C), with 82% yield.

<sup>1</sup>H NMR (400 MHz, CDCl<sub>3</sub>): δ 1.61-1.75 (m, 5H), 2.98 (t, *J* = 8 Hz, 2H), 4.35 (t, *J* = 8 Hz, 1H), 7.22-7.49 (m, 8H), 7.52 (d, *J* = 7.5 Hz, 2H). <sup>13</sup>C NMR (100 MHz, CDCl<sub>3</sub>): δ 26.1, 28.0, 47.3, 65.3, 75.2, 127.0, 127.2, 127.5, 128.0, 128.2, 128.5, 142.3, 142.7.

#### (4*S*,5*R*)-3-(Methoxycarbonyl)-5-formyl-4-phenyl-5-ethyl-4,5-dihydroisoxazole 2-oxide (**3a**)

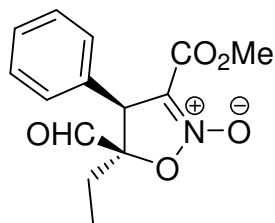

According to general procedure: 16 h, at room temperature, the product was obtained from flash chromatography (hexane/EtOAc = 10:1 to 2:1), as white solid 36 mg (Mp: 126-128 °C), 64% yield, 10:1 dr, 95% *ee*. HPLC analysis: Chiralcel OD-H (hexane/*i*-PrOH = 90/10, 1.0 mL/min), *t*<sub>R</sub> (major) 11.66 min, *t*<sub>R</sub> (minor) 16.57 min [α]<sub>D</sub><sup>22</sup> = +119.2° (*c* = 3.17, CHCl<sub>3</sub>). <sup>1</sup>H NMR (400 MHz, CDCl<sub>3</sub>): δ 1.03 (t, *J* = 7.4 Hz, 3H), 2.07-2.17 (m, 2H), 3.72 (s, 3H), 4.55 (s, 1H), 7.14-7.16 (m, *J* = 6.8 Hz, 2H), 7.32-7.38 (m, 3H), 9.13 (s, 1H). <sup>13</sup>C NMR (100 MHz, CDCl<sub>3</sub>): δ 7.2, 28.9, 52.8, 57.0, 88.6, 110.4, 127.9, 129.1, 129.6, 133.1, 158.7, 196.7, HRMS (ESI) Calcd for C<sub>14</sub>H<sub>16</sub>NO<sub>5</sub> ([M+H]<sup>+</sup>) 278.1028, found 278.1032.

**(4*S*,5*R*)-3-(Methoxycarbonyl)-5-formyl-4-phenyl-5-propyl-4,5-dihydroisoxazole 2-oxide (3b)**

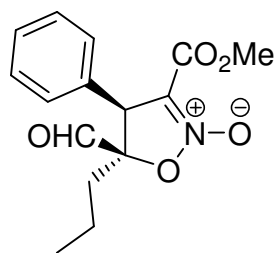

According to general procedure: 16 h, at room temperature, the product was obtained from flash chromatography (hexane/EtOAc = 10:1 to 2:1), as white solid 39 mg (Mp: 149-152 °C), 68% yield, 11:1 dr, 94% *ee*. HPLC analysis: Chiralcel OD-H (hexane/*i*-PrOH = 90/10, 1.0 mL/min),  $t_R$  (major) 9.35 min,  $t_R$  (minor) 18.61 min  $[\alpha]_D^{22} = +92.3^\circ$  ( $c = 1.65$ , CHCl<sub>3</sub>). <sup>1</sup>H NMR (400 MHz, CDCl<sub>3</sub>):  $\delta$  0.97 (t,  $J = 7.3$  Hz, 3H), 1.30-1.39 (m, 1H), 1.53-1.59 (m, 1H), 2.01-2.10 (m, 2H), 3.73 (s, 3H), 4.54 (s, 1H), 7.14-7.15 (m,  $J = 6.9$  Hz, 2H), 7.32-7.36 (m, 3H), 9.13 (s, 1H). <sup>13</sup>C NMR (100 MHz, CDCl<sub>3</sub>):  $\delta$  14.2, 16.3, 38.1, 52.8, 57.4, 88.4, 110.4, 127.9, 129.2, 129.6, 133.3, 158.1, 196.8, HRMS (ESI) Calcd for C<sub>15</sub>H<sub>18</sub>NO<sub>5</sub> ([M+H]<sup>+</sup>) 292.1185, found 292.1179.

**(4*S*,5*R*)-3-(Methoxycarbonyl)-5-formyl-4-phenyl-5-butyl-4,5-dihydroisoxazole 2-oxide (3c)**

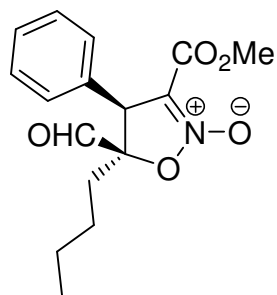

According to general procedure: 14 h, at room temperature, the product was obtained from flash chromatography (hexane/EtOAc = 10:1 to 2:1), as white solid 57 mg (Mp: 145-147 °C), 94% yield, 11:1 dr, >99% *ee*. HPLC analysis: Chiralcel OD-H (hexane/*i*-PrOH = 90/10, 1.0 mL/min),  $t_R$  (major) 8.48 min,  $t_R$  (minor) 17.81 min  $[\alpha]_D^{22} = +108.3^\circ$  ( $c = 1.70$ , CHCl<sub>3</sub>). <sup>1</sup>H NMR (400 MHz, CDCl<sub>3</sub>):  $\delta$  0.91 (t,  $J = 7.2$  Hz, 3H), 1.33-1.38 (m, 3H), 1.45-1.54 (m, 1H), 2.02-2.12 (m, 2H), 3.73 (s, 3H), 4.55 (s, 1H), 7.14-7.15 (m,  $J = 6.6$  Hz, 2H), 7.34-7.36 (m, 3H), 9.13 (s, 1H). <sup>13</sup>C NMR (100 MHz, CDCl<sub>3</sub>):  $\delta$  13.7, 22.8, 24.8, 35.8, 52.8, 57.3, 88.5, 110.4, 127.9, 129.2, 129.6, 133.3, 158.7, 196.8, HRMS (ESI) Calcd for C<sub>16</sub>H<sub>20</sub>NO<sub>5</sub> ([M+H]<sup>+</sup>) 306.1341, found 306.1343.

**(4*S*,5*R*)-3-(Methoxycarbonyl)-5-formyl-4-phenyl-5-heptyl-4,5-dihydroisoxazole 2-oxide (3d)**

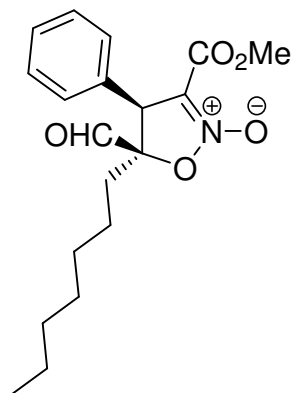

According to general procedure: 16 h, at room temperature, the product was obtained from flash chromatography (hexane/EtOAc = 10:1 to 2:1), as white solid 58 mg (Mp: 82-85 °C), 84% yield, 9:1 dr, 92% *ee*. HPLC analysis: Chiralcel OD-H (hexane/*i*-PrOH = 90/10, 1.0 mL/min),  $t_R$  (major) 8.96 min,  $t_R$  (minor) 23.50 min [ $\alpha$ ]<sub>D</sub><sup>22</sup> = +94.9° (c = 4.00, CHCl<sub>3</sub>). <sup>1</sup>H NMR (400 MHz, CDCl<sub>3</sub>): δ 0.87 (t, *J* = 7.0 Hz, 3H), 1.26-1.29 (m, 9H), 1.51-1.54 (m, 1H), 2.02-2.11 (m, 2H), 3.72 (s, 3H), 4.55 (s, 1H), 7.13-7.15 (m, *J* = 6.6 Hz, 2H), 7.31-7.35 (m, 3H), 9.12 (s, 1H). <sup>13</sup>C NMR (100 MHz, CDCl<sub>3</sub>): δ 14.1, 22.6, 22.8, 28.9, 29.6, 31.6, 36.0, 52.8, 57.3, 88.5, 110.4, 127.9, 129.2, 129.6, 133.1, 158.7, 196.8, HRMS (ESI) Calcd for C<sub>19</sub>H<sub>26</sub>NO<sub>5</sub> ([M+H]<sup>+</sup>) 348.1811, found 348.1811.

**(4*S*,5*S*)- 5-(Benzyloxymethyl)- 5-formyl -3-(Methoxycarbonyl)-4-phenyl-4,5-dihydroisoxazole 2-oxide (3e)**

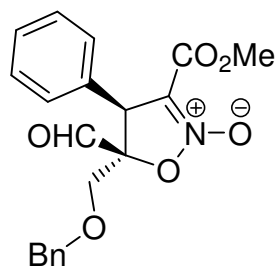

According to general procedure: 14 h, at room temperature, the product was obtained from flash chromatography (hexane/EtOAc = 10:1 to 2:1), as sticky oil 55 mg, 75% yield, 18:1 dr, 99% *ee*. HPLC analysis: Chiralcel OD-H (hexane/*i*-PrOH = 90/10, 1.0 mL/min),  $t_R$  (major) 22.48 min,  $t_R$  (minor) 29.62 min [ $\alpha$ ]<sub>D</sub><sup>22</sup> = +44.6° (c = 2.60, CHCl<sub>3</sub>). <sup>1</sup>H NMR (400 MHz, CDCl<sub>3</sub>): δ 3.72 (s, 3H), 3.82-3.94 (dd, *J* = 8, 36 Hz, 2H), 4.65-4.66 (m, *J* = 4 Hz, 2H), 7.13-7.15 (m, *J* = 8.0 Hz, 2H), 7.32-7.38 (m, 8H), 9.14 (s, 1H). <sup>13</sup>C NMR (100 MHz, CDCl<sub>3</sub>): δ 52.8, 53.9, 70.6, 74.1, 86.7, 110.1, 127.8, 128.0, 128.2, 128.6, 129.2, 129.7, 132.9, 136.9, 158.6, 195.1, HRMS (ESI) Calcd for C<sub>20</sub>H<sub>20</sub>NO<sub>6</sub> ([M+H]<sup>+</sup>) 370.1291, found 370.1299.



**(4*S*,5*R*)-5-Benzyl-4-phenyl-5-formyl-3-(methoxycarbonyl)-4,5-dihydroisoxazole 2-oxide (3f)**

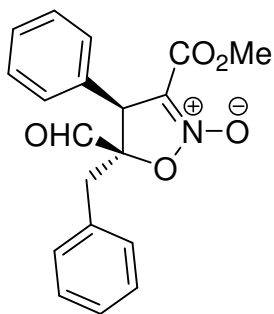

According to general procedure: 24 h, at room temperature, the product was obtained from flash chromatography (hexane/EtOAc = 4:1 to 2:1), as sticky oil 47 mg, 70% yield, 8:1 dr, 99% *ee*. HPLC analysis: Chiralcel OD-H (hexane/*i*-PrOH = 95/05, 1.0 mL/min),  $t_R$  (major) 25.77 min,  $t_R$  (minor) 43.81 min.  $[\alpha]_D^{21} = +60.8^\circ$  ( $c = 1.40$ , CHCl<sub>3</sub>).  $^1\text{H}$  NMR (400 MHz,  $\text{CDCl}_3$ ):  $\delta$  3.28 (s, 2H), 3.63 (s, 3H), 4.63 (s, 1H), 7.15-7.16 (d,  $J = 2.7$  Hz, 2H), 7.31-7.35 (m, 8H), 9.14 (s, 1H).  $^{13}\text{C}$  NMR (100 MHz,  $\text{CDCl}_3$ ):  $\delta$  40.9, 52.7, 56.3, 87.6, 110.0, 127.8, 128.0, 128.7, 129.2, 129.2, 129.7, 130.3, 132.5, 132.9, 158.2, 196.6. HRMS (ESI) Calcd for C<sub>19</sub>H<sub>18</sub>NO<sub>5</sub> ( $[\text{M}+\text{H}]^+$ ) 340.1185, found 340.1179.

**(4*S*,5*R*)-3-(Ethoxycarbonyl)-5-formyl-4-phenyl-5-propyl-4,5-dihydroisoxazole 2-oxide (3g)**

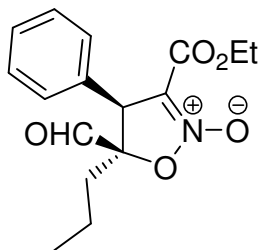

According to general procedure: 16 h, at room temperature, the product was obtained from flash chromatography (hexane/EtOAc = 10:1 to 2:1), as white solid 38 mg (Mp: 113-114 °C), 87% yield, 9:1 dr, 91% *ee*. HPLC analysis: Chiralcel OD-H (hexane/*i*-PrOH = 90/10, 1.0 mL/min),  $t_R$  (major) 8.44 min,  $t_R$  (minor) 19.44 min  $[\alpha]_D^{22} = +90.1^\circ$  ( $c = 3.80$ , CHCl<sub>3</sub>).  $^1\text{H}$  NMR (400 MHz,  $\text{CDCl}_3$ ):  $\delta$  0.97 (t,  $J = 7.2$  Hz, 3H), 1.11 (t,  $J = 7.2$  Hz, 3H), 1.31-1.39 (m, 1H), 1.52-1.61 (m, 1H), 1.99-2.14 (m, 2H), 4.12-4.22 (m, 2H), 4.54 (s, 1H), 7.14 (t,  $J = 6.4$  Hz, 2H), 7.31-7.37 (m, 3H), 9.16 (s, 1H).  $^{13}\text{C}$  NMR (100 MHz,  $\text{CDCl}_3$ ):  $\delta$  13.9, 14.2, 16.3, 38.1, 57.6, 62.0, 88.3, 110.4, 127.9, 129.1, 133.3, 158.1, 196.9. HRMS (ESI) Calcd for C<sub>16</sub>H<sub>20</sub>NO<sub>5</sub> ( $[\text{M}+\text{H}]^+$ ) 306.1341, found 306.1344.

**(4*S*,5*R*)-3-(Ethoxycarbonyl)-5-formyl-5-propyl-4-*o*-tolyl-4,5-dihydroisoxazole 2-oxide (3h)**

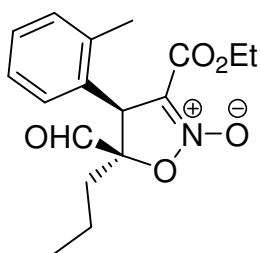

According to general procedure: 24 h, at room temperature, the product was obtained from flash chromatography (hexane/EtOAc = 10:1 to 2:1), as white solid 52 mg (Mp: 75-77 °C), 81% yield, 11:1 dr, 97% *ee*. HPLC analysis: Chiralcel OD-H (hexane/*i*-PrOH = 90/10, 1.0 mL/min),  $t_R$  (major) 6.37 min,  $t_R$  (minor) 22.00 min.  $[\alpha]_D^{22} = +59.9^\circ$  ( $c = 4.50$ , CHCl<sub>3</sub>). <sup>1</sup>H NMR (400 MHz, CDCl<sub>3</sub>):  $\delta$  0.97 (t,  $J = 7.2$  Hz, 3H), 1.12 (t,  $J = 7.2$  Hz, 3H), 1.29-1.38 (m, 1H), 1.53-1.62 (m, 1H), 2.00-2.236 (m, 2H), 2.32 (s, 3H), 4.13-4.21 (m, 2H), 4.77 (s, 1H), 7.10-7.13 (q,  $J = 1.6$  Hz, 1H), 7.19 (d,  $J = 5.2$  Hz, 3H), 9.11 (s, 1H). <sup>13</sup>C NMR (100 MHz, CDCl<sub>3</sub>):  $\delta$  13.9, 14.2, 16.4, 38.5, 52.9, 62.0, 88.2, 110.8, 126.6, 127.0, 128.9, 131.5, 131.8, 158.0, 197.3. HRMS (ESI) Calcd for C<sub>17</sub>H<sub>22</sub>NO<sub>5</sub> ( $[M+H]^+$ ) 320.1498, found 320.1494.

**(4*S*,5*R*)-4-(2-Chlorophenyl)-3-(ethoxycarbonyl)-5-formyl-5-propyl-4,5-dihydroisoxazole 2-oxide (3i)**

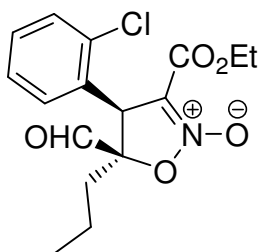

According to general procedure: 16 h, at room temperature, the product was obtained from flash chromatography (hexane/EtOAc = 10:1 to 2:1), as white solid 43 mg (Mp: 78-79 °C), 64% yield, >20:1 dr, 96% *ee*. HPLC analysis: Chiralcel OD-H (hexane/*i*-PrOH = 90/10, 1.0 mL/min),  $t_R$  (major) 8.78 min,  $t_R$  (minor) 30.14 min.  $[\alpha]_D^{22} = +46.1^\circ$  ( $c = 3.507$ , CHCl<sub>3</sub>). <sup>1</sup>H NMR (400 MHz, CDCl<sub>3</sub>):  $\delta$  0.99 (t,  $J = 7.2$  Hz, 3H), 1.12 (t,  $J = 7.3$  Hz, 3H), 1.33-1.41 (m, 1H), 1.55-1.62 (m, 1H), 2.07-2.24 (m, 2H), 4.13-4.22 (m, 2H), 5.24 (s, 1H), 7.16-7.18 (m, 1H), 7.27 (t,  $J = 3.0$  Hz, 2H), 7.41-7.44 (m, 1H), 9.13 (d,  $J = 0.5$  Hz, 1H). <sup>13</sup>C NMR (100 MHz, CDCl<sub>3</sub>):  $\delta$  13.8, 14.2, 16.3, 38.0, 52.8, 62.1, 88.0, 109.8, 127.8, 128.4, 130.3, 130.6, 131.5, 133.8, 157.9, 195.5. HRMS (ESI) Calcd for C<sub>16</sub>H<sub>19</sub>NO<sub>5</sub>Cl ( $[M+H]^+$ ) 340.0952, found 340.0956.

**(4*S*,5*R*)-3-(Ethoxycarbonyl)-5-formyl-5-propyl-4-m-tolyl-4,5-dihydroisoxazole 2-oxide (3j)**

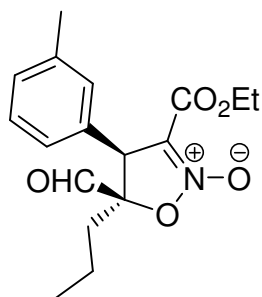

According to general procedure: 16 h, at room temperature, the product was obtained from flash chromatography (hexane/EtOAc = 10:1 to 2:1), as white solid 51 mg (Mp: 111-113 °C), 80% yield, 11:1 dr, 92% *ee*. HPLC analysis: Chiralcel OD-H (hexane/*i*-PrOH = 90/10, 1.0 mL/min),  $t_R$  (major) 6.39 min,  $t_R$  (minor) 15.20 min.  $[\alpha]^{22}_D = +66.9^\circ$  ( $c = 4.80$ , CHCl<sub>3</sub>). <sup>1</sup>H NMR (400 MHz, CDCl<sub>3</sub>):  $\delta$  0.97 (t,  $J = 7.2$  Hz, 3H), 1.14 (t,  $J = 7.2$  Hz, 3H), 1.33-1.35 (m, 1H), 1.54-1.58 (m, 1H), 1.98-2.13 (m, 2H), 2.32 (s, 3H), 4.13-4.23 (m, 2H), 4.49 (s, 1H), 6.94 (s, 2H), 7.11 (d,  $J = 7.6$  Hz, 1H), 7.23 (t,  $J = 8.0$  Hz, 1H), 9.15 (s, 1H). <sup>13</sup>C NMR (100 MHz, CDCl<sub>3</sub>):  $\delta$  13.9, 14.2, 16.3, 21.4, 38.1, 57.5, 62.0, 88.2, 110.5, 125.0, 128.4, 129.4, 129.9, 133.2, 139.5, 158.2, 196.9. HRMS (ESI) Calcd for C<sub>17</sub>H<sub>22</sub>NO<sub>5</sub> ([M+H]<sup>+</sup>) 320.1498, found 320.1496.

**(4*S*,5*R*)-4-(3-Chlorophenyl)-3-(ethoxycarbonyl)-5-formyl-5-propyl-4,5-dihydroisoxazole 2-oxide (3k)**

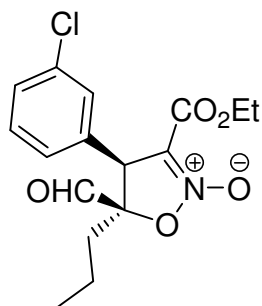

According to general procedure: 9 h, at room temperature, the product was obtained from flash chromatography (hexane/EtOAc = 10:1 to 2:1), as white solid 43 mg (Mp: 106-108 °C), 63% yield, >20:1 dr, > 96% *ee*. HPLC analysis: Chiralcel OD-H (hexane/*i*-PrOH = 90/10, 1.0 mL/min),  $t_R$  (major) 8.30 min,  $t_R$  (minor) 21.12 min.  $[\alpha]^{22}_D = +40.7^\circ$  ( $c = 1.70$ , CHCl<sub>3</sub>). <sup>1</sup>H NMR (400 MHz, CDCl<sub>3</sub>):  $\delta$  0.97 (t,  $J = 7.3$  Hz, 3H), 1.15 (t,  $J = 7.1$  Hz, 3H), 1.33-1.36 (m, 1H), 1.54-1.60 (m, 1H), 1.98-2.12 (m, 2H), 4.14-4.24 (m, 2H), 4.50 (s, 1H), 7.03 (d,  $J = 3.4$  Hz, 1H), 7.15 (s, 1H), 7.29 (d,  $J = 4.8$  Hz, 2H), 9.22 (s, 1H). <sup>13</sup>C NMR (100 MHz, CDCl<sub>3</sub>):  $\delta$  13.9, 14.2, 16.3, 38.3, 57.1, 62.2, 88.2, 110.0, 126.0, 128.1, 129.4, 130.8, 135.5, 135.6, 157.9, 196.8. HRMS (ESI) Calcd for C<sub>16</sub>H<sub>19</sub>NO<sub>5</sub>Cl ([M+H]<sup>+</sup>) 340.0952, found 340.0956.

**(4*S*,5*R*)-4-(4-Bromophenyl)-3-(ethoxycarbonyl)-5-formyl-5-propyl-4,5-dihydroisoxazole 2-oxide (3l)**

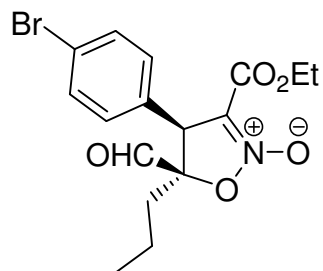

According to general procedure: 16 h, at room temperature, the product was obtained from flash chromatography (hexane/EtOAc = 10:1 to 2:1), as white solid 60 mg (Mp: 99-101 °C), 78% yield, 14:1 dr, 94% *ee*. HPLC analysis: Chiralcel OD-H (hexane/*i*-PrOH = 90/10, 1.0 mL/min),  $t_R$  (major) 8.58 min,  $t_R$  (minor) 26.68 min.  $[\alpha]_D^{24} = +44.4^\circ$  (c = 2.40, CHCl<sub>3</sub>). <sup>1</sup>H NMR (400 MHz, CDCl<sub>3</sub>): δ 0.96 (t, *J* = 7.2 Hz, 3H), 1.14 (t, *J* = 7.2 Hz, 3H), 1.25-1.36 (m, 1H), 1.52-1.59 (m, 1H), 1.97-2.13 (m, 2H), 4.14-4.22 (m, 2H), 4.50 (s, 1H), 7.03 (d, *J* = 8.4 Hz, 2H), 7.48 (t, *J* = 8.4 Hz, 2H), 9.18 (s, 1H). <sup>13</sup>C NMR (100 MHz, CDCl<sub>3</sub>): δ 13.9, 14.2, 16.3, 38.2, 57.0, 62.2, 88.2, 110.1, 123.3, 129.5, 132.5, 132.7, 158.0, 196.9. HRMS (ESI) Calcd for C<sub>16</sub>H<sub>19</sub>NO<sub>5</sub>Br ([M+H]<sup>+</sup>) 384.0447, found 384.0446.

**(4*S*,5*R*)-3-(Ethoxycarbonyl)-5-formyl-5-propyl-4-*p*-tolyl-4,5-dihydroisoxazole 2-oxide (3m)**

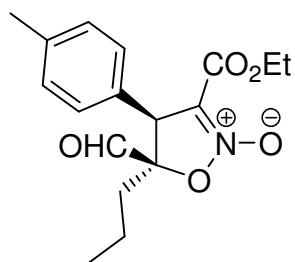

According to general procedure: 16 h, at room temperature, the product was obtained from flash chromatography (hexane/EtOAc = 10:1 to 2:1), as white solid 52 mg (Mp: 93-96 °C), 81% yield, 10:1 dr, 92% *ee*. HPLC analysis: Chiralcel OD-H (hexane/*i*-PrOH = 90/10, 1.0 mL/min),  $t_R$  (major) 6.73 min,  $t_R$  (minor) 15.74 min.  $[\alpha]_D^{22} = +69.8^\circ$  (c = 4.20, CHCl<sub>3</sub>). <sup>1</sup>H NMR (400 MHz, CDCl<sub>3</sub>): δ 0.96 (t, *J* = 7.2 Hz, 3H), 1.13 (t, *J* = 7.2 Hz, 3H), 1.33-1.39 (m, 1H), 1.53-1.63 (m, 1H), 1.98-2.15 (m, 2H), 2.34 (s, 3H), 4.16-4.24 (m, 2H), 4.53 (s, 1H), 7.03-7.05 (q, *J* = 7.6 Hz, 2H), 7.17 (d, *J* = 7.6 Hz, 2H), 9.17 (s, 1H). <sup>13</sup>C NMR (100 MHz, CDCl<sub>3</sub>): δ 13.9, 14.2, 16.3, 38.0, 57.2, 62.0, 88.3, 110.5, 127.7, 130.1, 130.2, 139.0, 158.2, 197.1. HRMS (ESI) Calcd for C<sub>17</sub>H<sub>22</sub>NO<sub>5</sub> ([M+H]<sup>+</sup>) 320.1498, found 320.1495.

**(4*S*,5*R*)-3-(Ethoxycarbonyl)-5-formyl-4-(4-methoxyphenyl)-5-propyl-4,5-dihydroisoxazole 2-oxide (3n)**

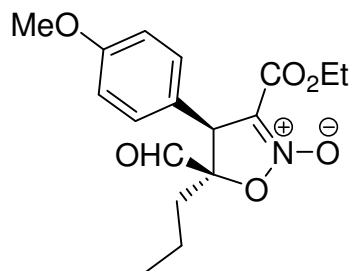

According to general procedure: 24 h, at room temperature, the product was obtained from flash chromatography (hexane/EtOAc = 10:1 to 2:1), as white solid 49 mg (Mp: 88-89 °C), 73% yield, 13:1 dr, 91% *ee*. HPLC analysis: Chiralcel OD-H (hexane/*i*-PrOH = 90/10, 1.0 mL/min),  $t_R$  (major) 11.31 min,  $t_R$  (minor) 27.46 min.  $[\alpha]_D^{22} = +69.1^\circ$  ( $c = 4.50$ , CHCl<sub>3</sub>). <sup>1</sup>H NMR (400 MHz, CDCl<sub>3</sub>):  $\delta$  0.96 (t,  $J = 7.2$  Hz, 3H), 1.13 (t,  $J = 7.2$  Hz, 3H), 1.30-1.36 (m, 1H), 1.51-1.58 (m, 1H), 1.95-2.12 (m, 2H), 3.78 (s, 3H), 4.13-4.22 (m, 2H), 4.49 (s, 1H), 6.85 (d,  $J = 8.8$  Hz, 2H), 7.05 (d,  $J = 8.8$  Hz, 2H), 9.15 (d,  $J = 0.4$  Hz, 1H). <sup>13</sup>C NMR (100 MHz, CDCl<sub>3</sub>):  $\delta$  13.9, 14.2, 16.3, 38.0, 55.3, 56.8, 62.0, 88.3, 110.5, 114.9, 125.0, 129.1, 158.2, 160.0, 197.1. HRMS (ESI) Calcd for C<sub>17</sub>H<sub>22</sub>NO<sub>6</sub> ([M+H]<sup>+</sup>) 336.1447, found 336.1443.

**(4*S*,5*R*)-3-(Ethoxycarbonyl)-5-formyl-4-(naphthalen-1-yl)-5-propyl-4,5-dihydroisoxazole 2-oxide (3o)**

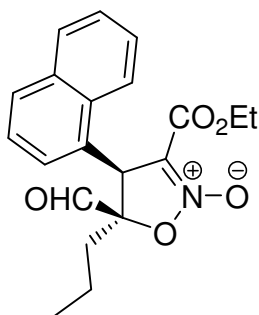

According to general procedure: 16 h, at room temperature, the product was obtained from flash chromatography (hexane/EtOAc = 10:1 to 2:1), as white solid 44 mg (Mp: 114-115 °C), 62% yield, 12:1 dr, 94% *ee*. HPLC analysis: Chiralcel OD-H (hexane/*i*-PrOH = 90/10, 1.0 mL/min),  $t_R$  (major) 10.47 min,  $t_R$  (minor) 31.92 min.  $[\alpha]_D^{22} = +5.7^\circ$  ( $c = 3.20$ , CHCl<sub>3</sub>). <sup>1</sup>H NMR (400 MHz, CDCl<sub>3</sub>):  $\delta$  0.97-1.04 (m, 6H), 1.36-1.43 (m, 1H), 1.60-1.68 (m, 1H), 2.17-2.33 (m, 2H), 4.08-4.14 (m, 2H), 5.43 (s, 1H), 7.37 (d,  $J = 7.2$  Hz, 1H), 7.45 (t,  $J = 7.2$  Hz, 1H), 7.56 (t,  $J = 7.6$  Hz, 1H), 7.64 (t,  $J = 8.0$  Hz, 1H), 7.83-7.92 (m, 3H), 8.98 (s, 1H). <sup>13</sup>C NMR (100 MHz, CDCl<sub>3</sub>):  $\delta$  13.8, 14.2, 16.4, 38.0, 51.8, 62.0, 88.0, 110.5, 122.3, 125.30, 125.33, 126.5, 127.3, 129.3, 129.9, 130.9, 134.2, 158.1, 195.5. HRMS (ESI) Calcd for C<sub>20</sub>H<sub>22</sub>NO<sub>5</sub> ([M+H]<sup>+</sup>) 356.1498, found 356.1496.

**(4*S*,5*R*)-5-Formyl-3-(methoxycarbonyl)-4-(naphthalen-2-yl)-5-propyl-4,5-dihydroisoxazole 2-oxide (3p)**

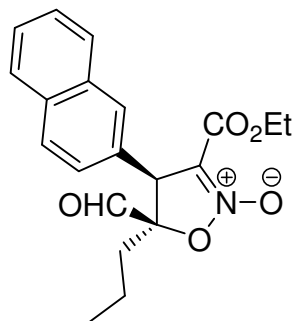

According to general procedure: 12 h, at room temperature, the product was obtained from flash chromatography (hexane/EtOAc = 8:1 to 2:1), as white solid 50 mg (Mp: 164-165 °C), 74% yield, 11:1 dr, 87% *ee*. After recrystallization, >99% *ee*. HPLC analysis: Chiralcel OD-H (hexane/*i*-PrOH = 90/10, 1.0 mL/min),  $t_R$  (major) 11.68 min,  $t_R$  (minor) 33.67 min.  $[\alpha]_D^{23} = +126.7^\circ$  ( $c = 2.00$ , CHCl<sub>3</sub>). <sup>1</sup>H NMR (400 MHz, <sup>1</sup>H CDCl<sub>3</sub>):  $\delta$  0.99 (t,  $J = 7.4$  Hz, 3H), 1.34-1.40 (m, 1H), 1.55-1.63 (m, 1H), 2.07-2.16 (m, 2H), 3.71 (s, 3H), 4.71 (s, 1H), 7.23 (d,  $J = 8.4$  Hz, 1H), 7.52 (t,  $J = 4.5$  Hz, 2H), 7.64 (s, 1H), 7.81-7.86 (m, 3H), 9.15 (s, 1H). <sup>13</sup>C NMR (100 MHz, CDCl<sub>3</sub>):  $\delta$  14.2, 16.3, 38.2, 52.9, 57.5, 88.6, 110.4, 125.0, 126.9, 127.0, 127.3, 127.8, 128.0, 129.8, 130.5, 133.3, 133.4, 158.7, 196.7. HRMS (ESI) Calcd for C<sub>19</sub>H<sub>20</sub>NO<sub>5</sub> ([M+H]<sup>+</sup>) 342.1341, found 342.1344.

**(4*S*,5*R*)-3-(Ethoxycarbonyl)-5-formyl-4-(furan-3-yl)-5-butyl-4,5-dihydroisoxazole 2-oxide (3q)**

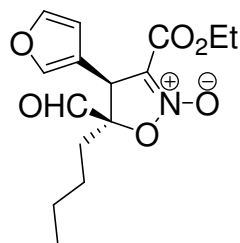

According to general procedure: 16 h, at room temperature, the product was obtained from flash chromatography (hexane/EtOAc = 10:1 to 6:1), as white solid 41 mg (Mp: 68-69 °C), 67% yield, >20:1 dr, 85% *ee*. HPLC analysis: Chiralcel OD-H (hexane/*i*-PrOH = 90/10, 1.0 mL/min),  $t_R$  (major) 8.38 min,  $t_R$  (minor) 18.39 min.  $[\alpha]_D^{22} = +30.8^\circ$  ( $c = 1.70$ , CHCl<sub>3</sub>). <sup>1</sup>H NMR (400 MHz, CDCl<sub>3</sub>):  $\delta$  0.91 (t,  $J = 7.2$  Hz, 3H), 1.27 (t,  $J = 7.2$  Hz, 3H), 1.30-1.41 (m, 3H), 1.47-1.51 (m, 1H), 1.98-2.08 (m, 2H), 4.22-4.26 (m, 2H), 4.53 (s, 1H), 6.25 (s, 1H), 7.37 (s, 1H), 7.41 (s, 1H), 9.34 (s, 1H). <sup>13</sup>C NMR (400 MHz, CDCl<sub>3</sub>):  $\delta$  13.7, 14.0, 22.8, 24.8, 35.0, 48.1, 62.1, 87.9, 109.4, 109.5, 117.9, 140.9, 144.7, 158.0, 196.8. HRMS (ESI) Calcd for C<sub>15</sub>H<sub>20</sub>NO<sub>6</sub> ([M+H]<sup>+</sup>) 309.1230, found 309.1228.

**(4*S*,5*R*)-3-(Ethoxycarbonyl)-5-formyl-4-(furan-2-yl)-5-propyl-4,5-dihydroisoxazole 2-oxide (3r)**

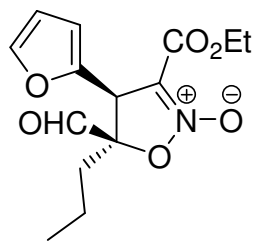

According to general procedure: 16 h, at room temperature, the product was obtained from flash chromatography (hexane/EtOAc = 8:1 to 2:1), as white solid 36 mg (Mp: 103-105 °C), 61% yield, 11:1 dr, 84% *ee*. HPLC analysis: Chiralcel OD-H (hexane/*i*-PrOH = 90/10, 1.0 mL/min),  $t_R$  (major) 9.18 min,  $t_R$  (minor) 15.85 min.  $[\alpha]^{22}_D = +12.5^\circ$  ( $c = 2.50$ , CHCl<sub>3</sub>). <sup>1</sup>H NMR (400 MHz, CDCl<sub>3</sub>):  $\delta$  0.96 (t,  $J = 7.6$  Hz, 3H), 1.19 (t,  $J = 6.8$  Hz, 3H), 1.35-1.40 (m, 1H), 1.48-1.59 (m, 1H), 1.92-2.11 (m, 2H), 4.17-4.29 (m, 2H), 4.70 (s, 1H), 6.28 (d,  $J = 3.2$  Hz, 1H), 6.33-6.35 (dd,  $J_1 = 3.2$  Hz,  $J_2 = 22.0$  Hz, 1H), 7.36 (d,  $J = 1.2$  Hz, 1H), 9.35 (s, 1H). <sup>13</sup>C NMR (100 MHz, CDCl<sub>3</sub>):  $\delta$  14.0, 14.2, 16.2, 37.4, 50.7, 62.1, 87.6, 107.7, 110.1, 111.2, 143.5, 145.9, 157.9, 196.2, HRMS (ESI) Calcd for C<sub>14</sub>H<sub>18</sub>NO<sub>6</sub> ( $[M+H]^+$ ) 296.1134, found 296.1135.

## Transformation of *cis*-isoxazoline *N*-oxides into densely functionalized 2-amino- $\gamma$ -lactone

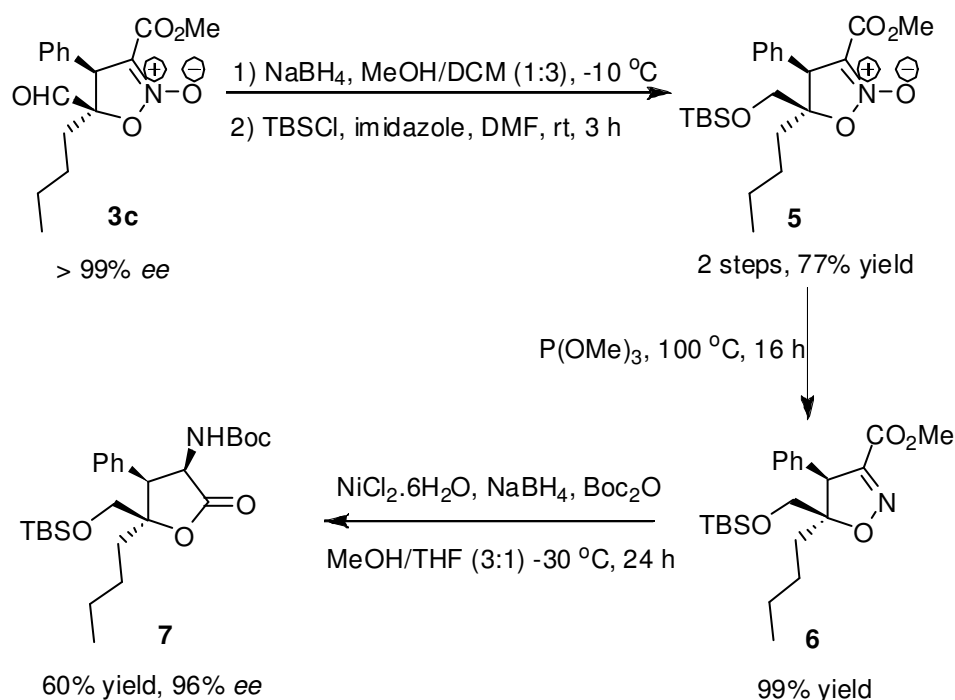

### (4*S*,5*R*)-5-Butyl-5-((*tert*-butyldimethylsilyloxy)methyl)-3-(methoxycarbonyl)-4-phenyl-4,5-dihydroisoxazole 2-oxide (**5**)

To the solution of **3c** (100 mg, 0.33 mmol) in MeOH/DCM 2 mL (1:3) under  $-10\text{ }^\circ\text{C}$ , was added  $\text{NaBH}_4$  (25 mg, 0.66 mmol) portionwise. Reaction completed in 10 minutes, then quenched with 5 mL saturated aqueous ammonium chloride. After separation, and dry on anhydrous magnesium sulfate, the solvent was removed under reduced pressure. Obtained residue and imidazole (45 mg, 0.66 mmol) dissolved in 1.0 mL anhydrous DMF, then TBDMSCl (99 mg, 0.66 mmol) was added in one portion. Reaction finished in 5 h, with TLC monitor. Subsequent chromatography purification on silicon gel gave colorless oil in 77% yield for two steps.

$^1\text{H}$  NMR (400 MHz,  $\text{CDCl}_3$ ):  $\delta$  -0.29 (s, 3H), -0.16 (s, 3H), 0.78 (s, 9H), 0.93 (t,  $J = 7.2\text{ Hz}$ , 3H), 1.33-1.52 (m, 4H), 1.94-1.96 (m, 2H), 3.23 (d,  $J = 10.5\text{ Hz}$ , 1H), 3.35 (d,  $J = 10.5\text{ Hz}$ , 1H), 3.68 (s, 3H), 4.40 (s, 1H), 7.14-7.17 (m, 2H), 7.30-7.32 (m, 3H).  $^{13}\text{C}$  NMR (100 MHz,  $\text{CDCl}_3$ ):  $\delta$  -6.1, -6.0, 14.0, 18.0, 22.9, 24.9, 25.7, 35.5, 52.5, 55.9, 61.3, 86.7, 113.0, 128.2, 128.7, 135.1, 159.4.



**(4S,5R)-Methyl 5-butyl-5-((tert-butyldimethylsilyloxy)methyl)-4-phenyl-4,5-dihydroisoxazole-3-carboxylate (6)**

A solution of **4** (82 mg, 0.2 mmol) in 1.0 mL P(OMe)<sub>3</sub> was stirred at 100 °C for 16 h, with N<sub>2</sub> protection, hereafter diluted with Et<sub>2</sub>O (5 mL), then 5 mL 1 M HCl was added at -10 °C. After separation, dried over magnesium sulfate, solution was concentrated in *vacuo*, then applied to silicon gel to give colorless oil in quantitative yield.

<sup>1</sup>H NMR (400 MHz, CDCl<sub>3</sub>): δ -0.33 (s, 3H), -0.17 (s, 3H), 0.77 (s, 9H), 0.93 (t, *J* = 7.2 Hz, 3H), 1.25-1.48 (m, 4H), 1.80-1.83 (m, 2H), 3.25 (d, *J* = 10.5 Hz, 1H), 3.46 (d, *J* = 10.5 Hz, 1H), 3.76 (s, 3H), 4.30 (s, 1H), 7.03 (d, *J* = 6.6 Hz, 2H), 7.26 -7.32 (m, 3H). <sup>13</sup>CH NMR (100 MHz, CDCl<sub>3</sub>): δ -6.1, -6.0, 14.0, 18.0, 23.0, 25.1, 25.7, 36.0, 52.6, 58.9, 61.6, 94.7, 127.9, 128.6, 128.8, 133.8, 154.0, 160.8.

**tert-Butyl (3R,4S,5R)-5-butyl-5-((tert-butyldimethylsilyloxy)methyl)-2-oxo-4-phenyltetrahydrofuran-3-ylcarbamate (7)**

NiCl<sub>2</sub>·6H<sub>2</sub>O (0.33 mmol, 3 equiv), Boc<sub>2</sub>O (0.33 mmol, 3 equiv) and **5** (0.11 mmol, 1 equiv) were suspended in a 3:1 mixture of MeOH/THF (0.8 mL) at -30 °C. After 10 min of stirring, NaBH<sub>4</sub> (1.1 mmol, 10 equiv) was added portionwise. The stirring was maintained at -30 °C for 24 h. After the reaction was completed, it was quenched with conc. NH<sub>4</sub>OH (2 mL), extracted with dichloromethane, dried over magnesium sulfate and concentrated in *vacuo*. Silicon gel chromatography purification gave 31 mg colorless oil in 60% yield.

96% *ee*. HPLC analysis: Chiralcel IA-H (hexane/*i*-PrOH = 98/2, 1.0 mL/min), *t*<sub>R</sub> (major) 6.87 min, *t*<sub>R</sub> (minor) 8.36 min. [α]<sup>21</sup><sub>D</sub> = +52.8° (c = 2.30, CHCl<sub>3</sub>).

<sup>1</sup>H NMR (400 MHz, CDCl<sub>3</sub>): δ -0.25 (s, 3H), -0.11 (s, 3H), 0.80 (s, 9H), 0.92 (t, *J* = 7.2 Hz, 3H), 1.29 (s, 9H), 1.35-1.41 (m, 4H), 1.87-1.92 (m, 2H), 3.33 (d, *J* = 12.0 Hz, 1H), 3.56 (d, *J* = 12.0 Hz, 1H), 3.72 (d, *J* = 12.0 Hz, 1H), 4.89 (d, *J* = 8.0 Hz, 1H), 5.05 (t, *J* = 8.0 Hz, 1H), 7.07 (d, *J* = 8.0 Hz, 2H), 7.26 -7.31 (m, 3H). <sup>13</sup>CH NMR (100 MHz, CDCl<sub>3</sub>): δ -6.1, 14.0, 18.1, 23.0, 25.6, 25.7, 25.7, 28.1, 35.2, 52.5, 53.3, 62.7, 80.2, 88.8, 127.8, 128.6, 129.6, 133.9, 155.1, 174.9. HRMS (ESI) Calcd for C<sub>26</sub>H<sub>43</sub>NO<sub>5</sub>SiNa ([M+Na]<sup>+</sup>) 500.2808, found 500.2805.

IV. Absolute configuration assignments of (4*S*,5*R*)-4-(4-Bromophenyl)-3-(ethoxycarbonyl)-5-formyl-5-propyl-4,5-dihydroisoxazole 2-oxide (3l)

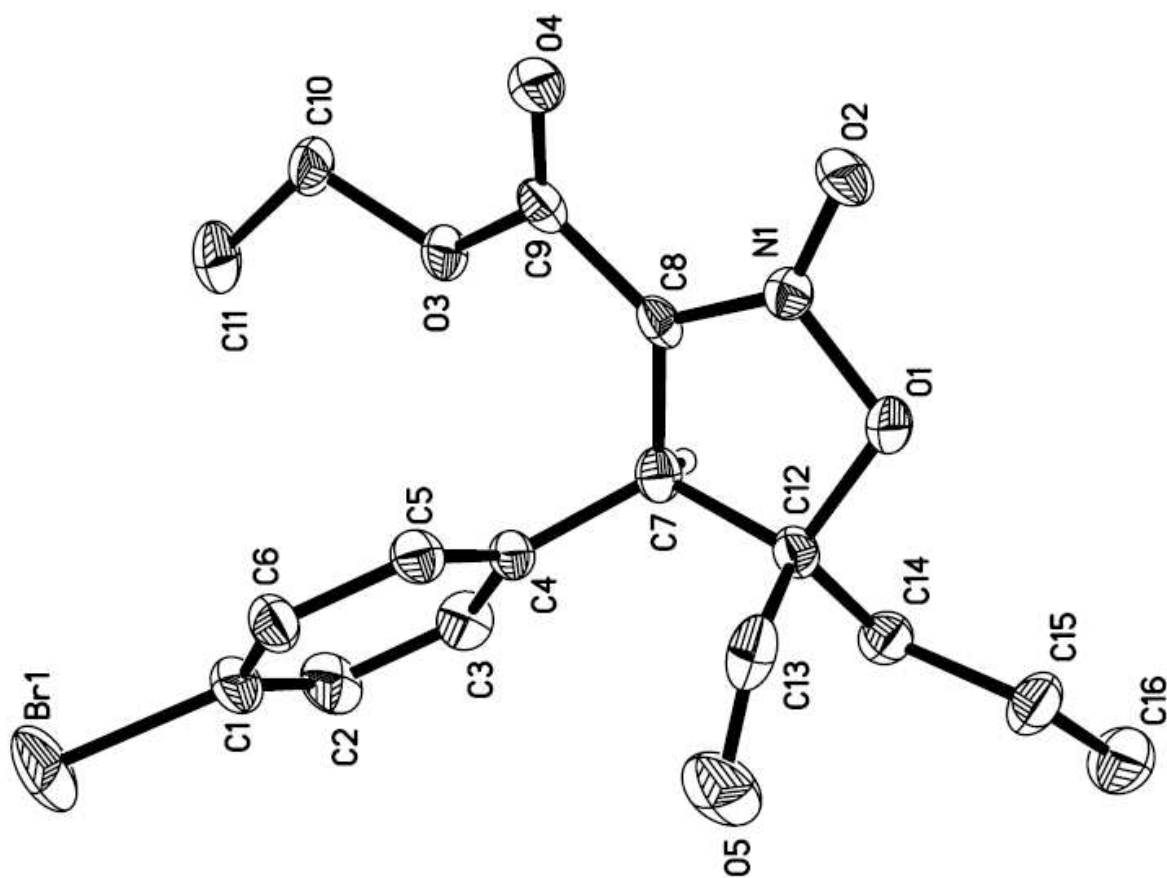

## V. Reference

1. a) Kanao, M.; Watanabe, Y.; Kimura, Y. *J. Med. Chem.* **1989**, 32, 1326. b) Riehl, J. J.; Fougereousse, A. *Tetraheron Lett.* **1968**, 42, 4415.
2. Fornicola, R.; Oblinger, E.; Montgomery, J. *J. Org. Chem.* **1998**, 63, 3528.
3. Hayashi, Y.; Gotoh, H.; Hayashi, T.; Shoji, M. *Angew. Chem.* **2005**, 117, 4284-4287; *Angew. Chem. Int. Ed.* **2005**, 44, 4212.
4. Chi, Y. ; Gellman, S. H. *Org. Lett.* **2005**, 7, 4253.
5. Cao, C.; Ye, M.; Sun, X.; Tang, Y. *Org. Lett.* **2006**, 8, 2901.
6. Luis, O. J.; Eusebio, J. *Tetrahedron* **2008**, 64, 9992.
7. Kanth, J. V. B.; Periasamy, M. *Tetrahedron* **1993**, 49, 5127.

# VI. $^1\text{H}$ NMR and $^{13}\text{C}$ NMR spectra

## (S)-2-(Azidodiphenylmethyl)pyrrolidine (4e)

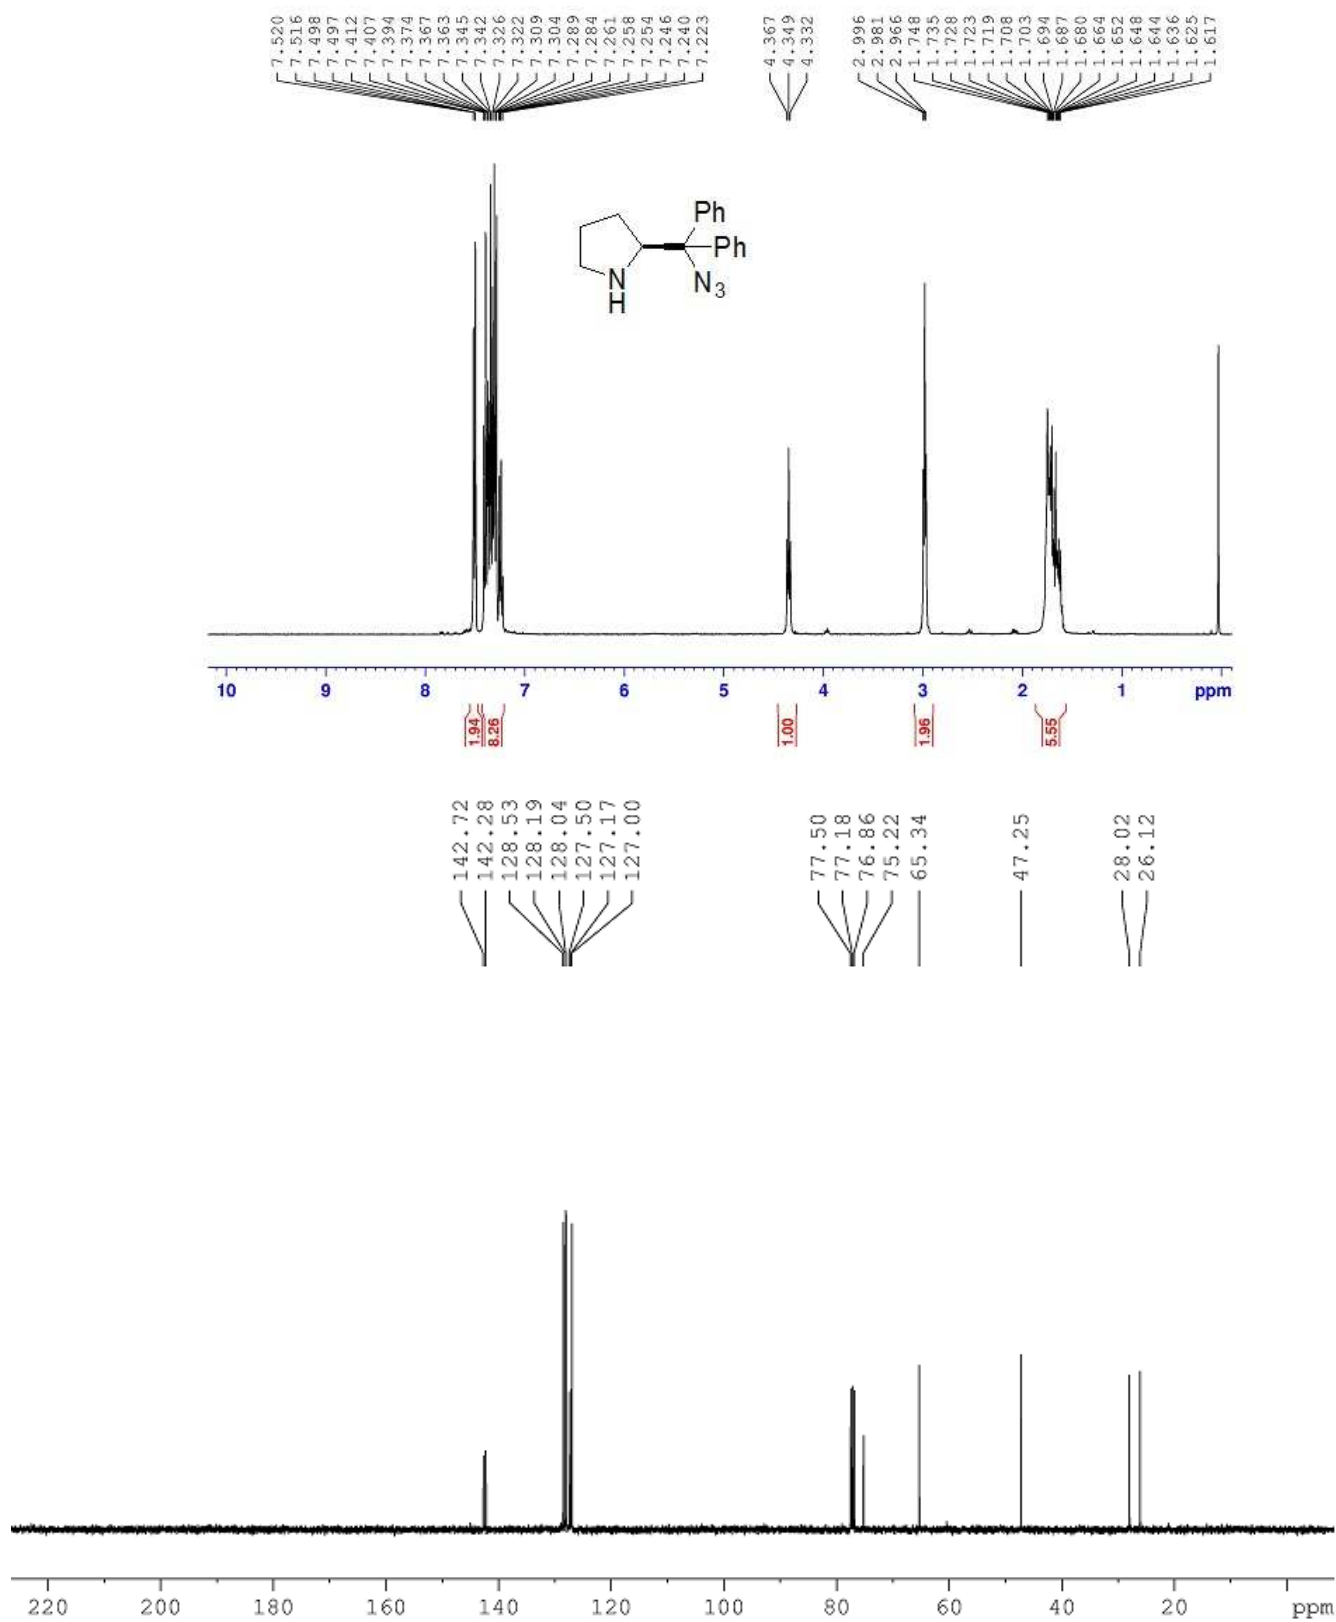

**(4*S*,5*R*)-3-(Methoxycarbonyl)-5-formyl-4-phenyl-5-ethyl-4,5-dihydroisoxazole 2-oxide (3a)**

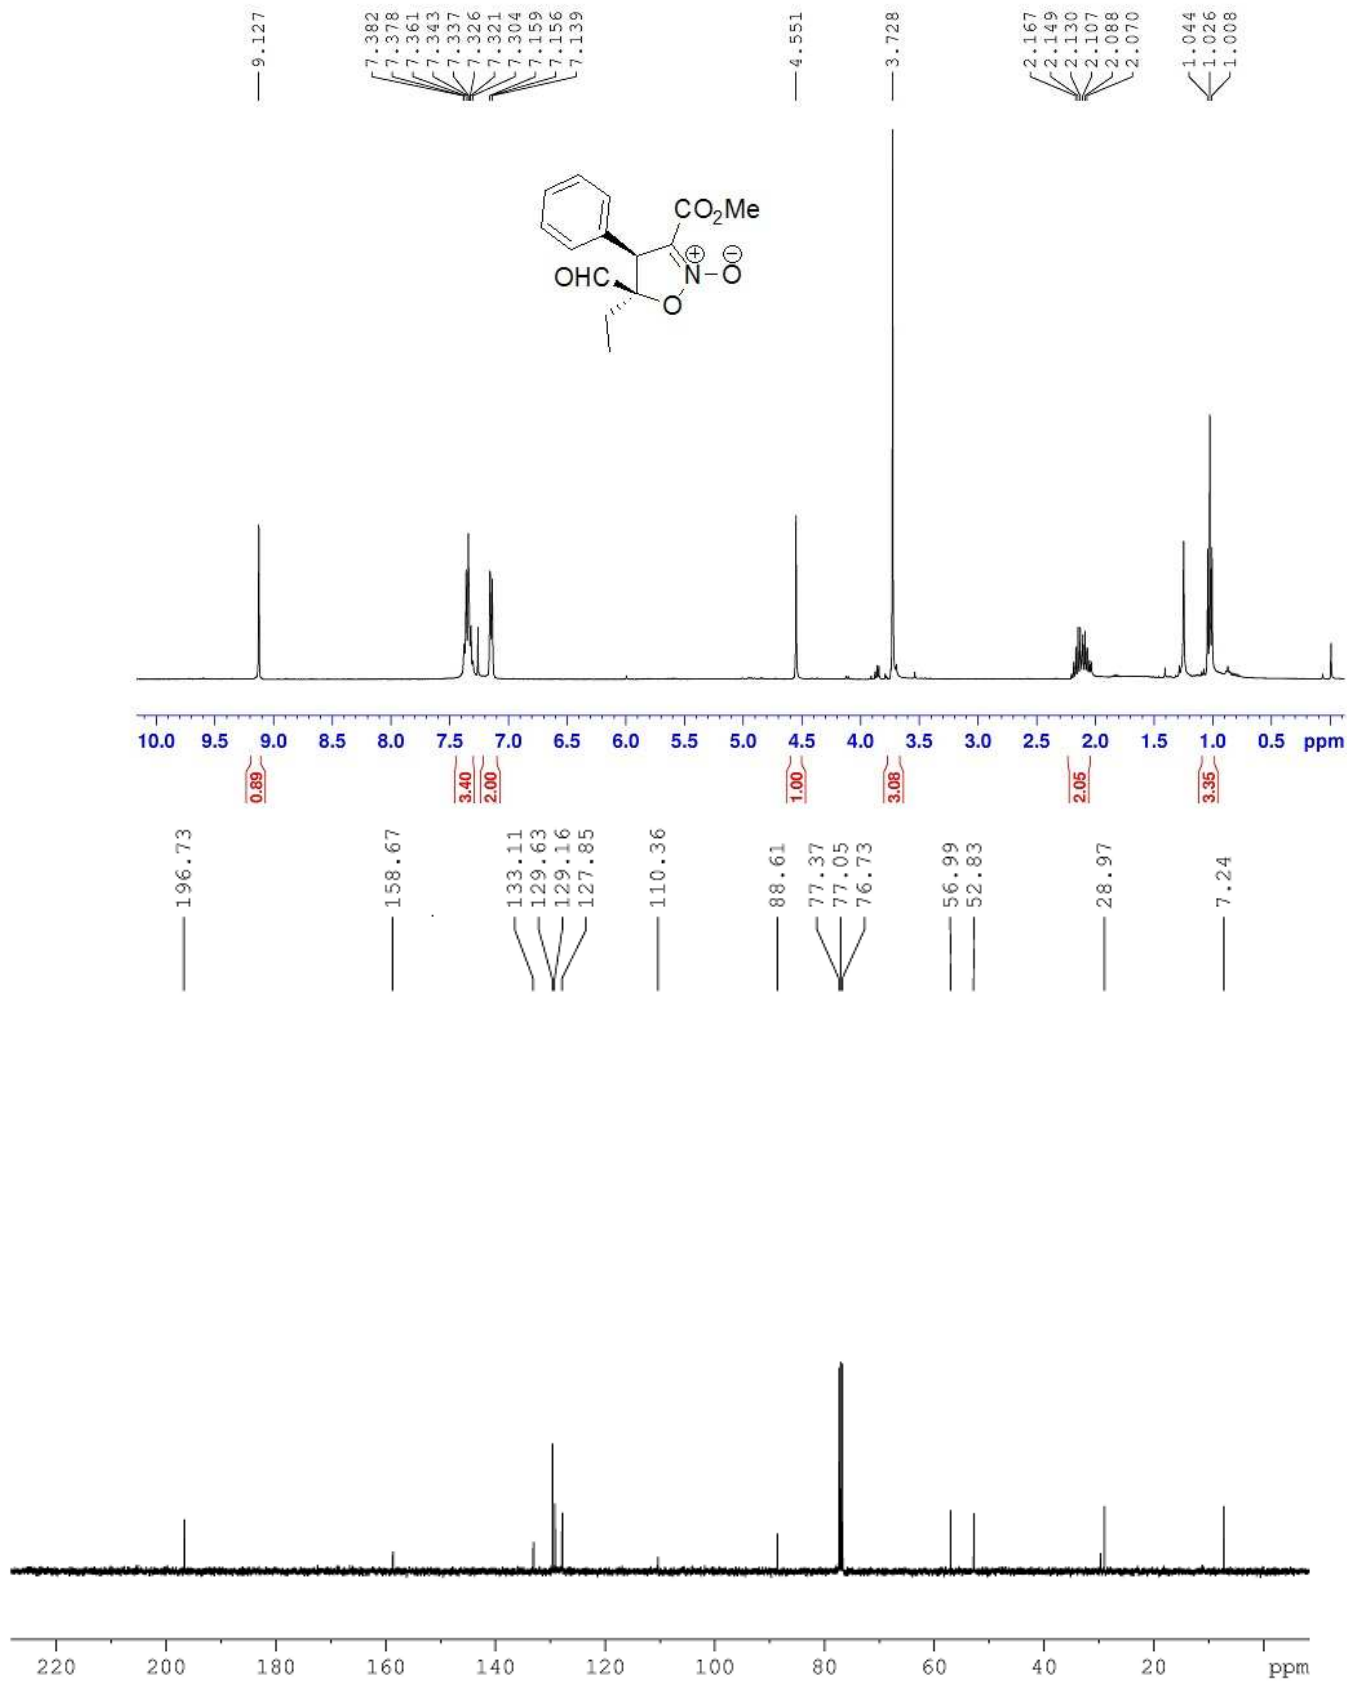

**(4*S*,5*R*)-3-(Methoxycarbonyl)-5-formyl-4-phenyl-5-propyl-4,5-dihydroisoxazole 2-oxide (3b)**

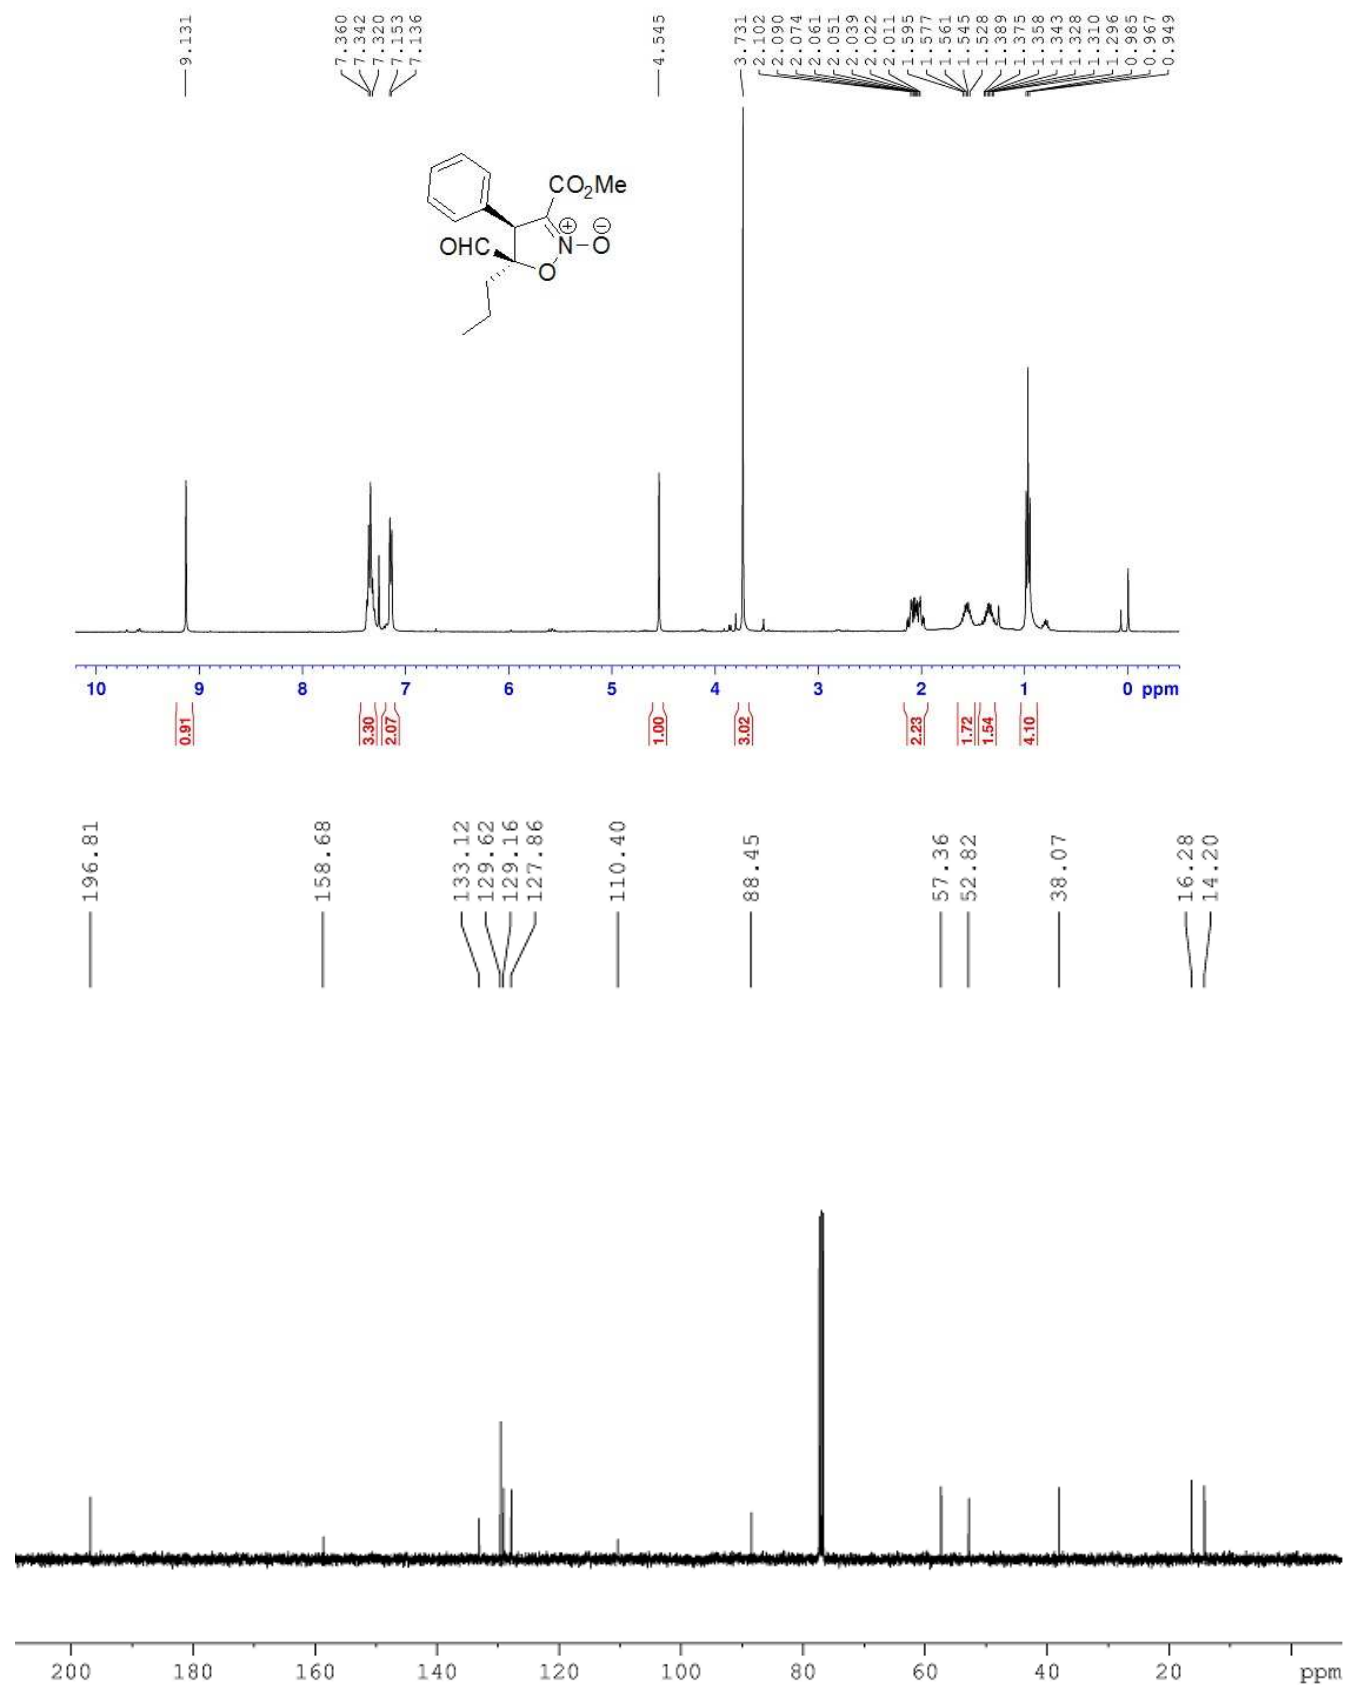

**(4*S*,5*R*)-3-(Methoxycarbonyl)-5-formyl-4-phenyl-5-butyl-4,5-dihydroisoxazole 2-oxide (3c)**

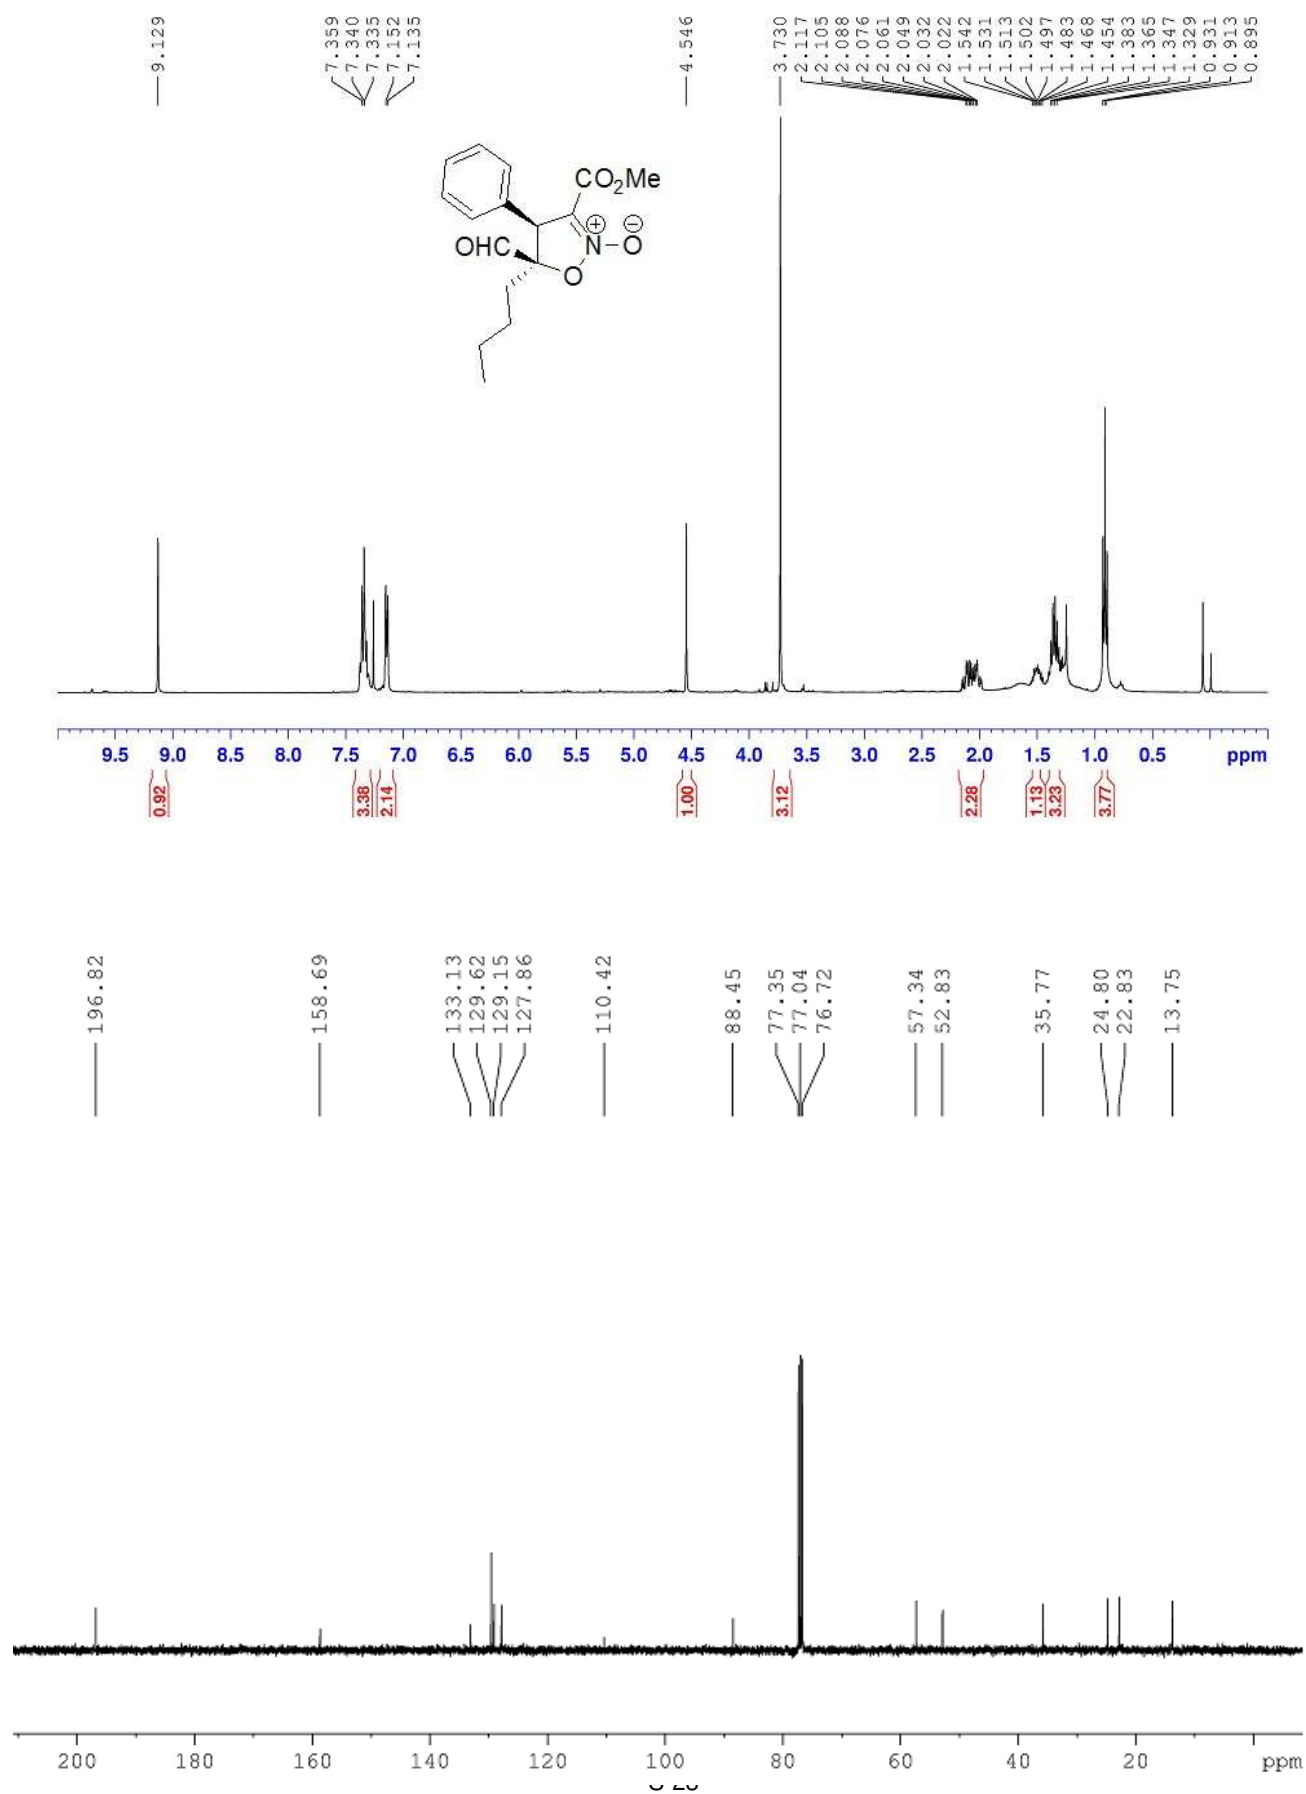

**(4*S*,5*R*)-3-(Methoxycarbonyl)-5-formyl-4-phenyl-5-heptyl-4,5-dihydroisoxazole 2-oxide (3d)**

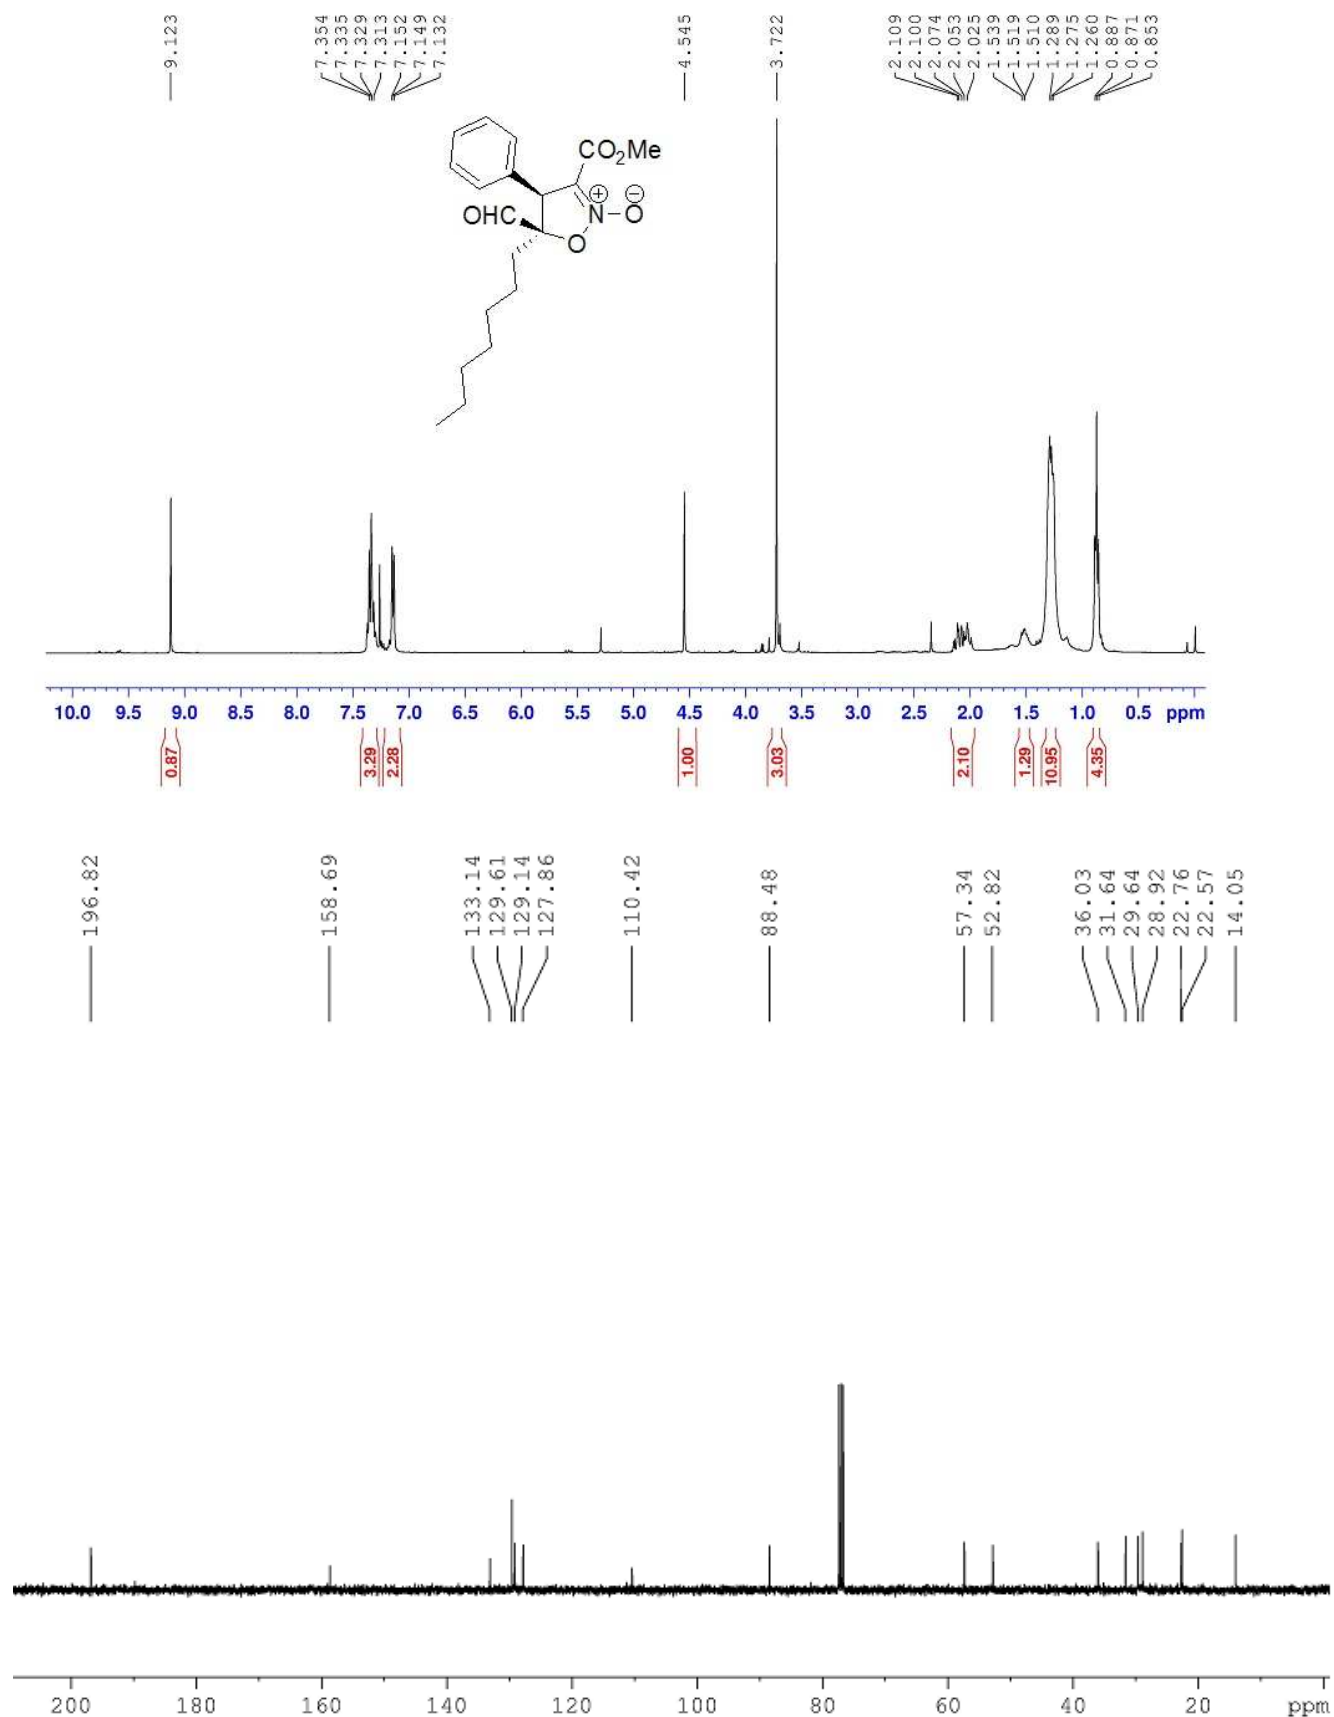



**(4*S*,5*S*)-5-(Benzyloxymethyl)-5-formyl-3-(Methoxycarbonyl)-4-phenyl-4,5-dihydroisoxazole 2-oxide (3e)**

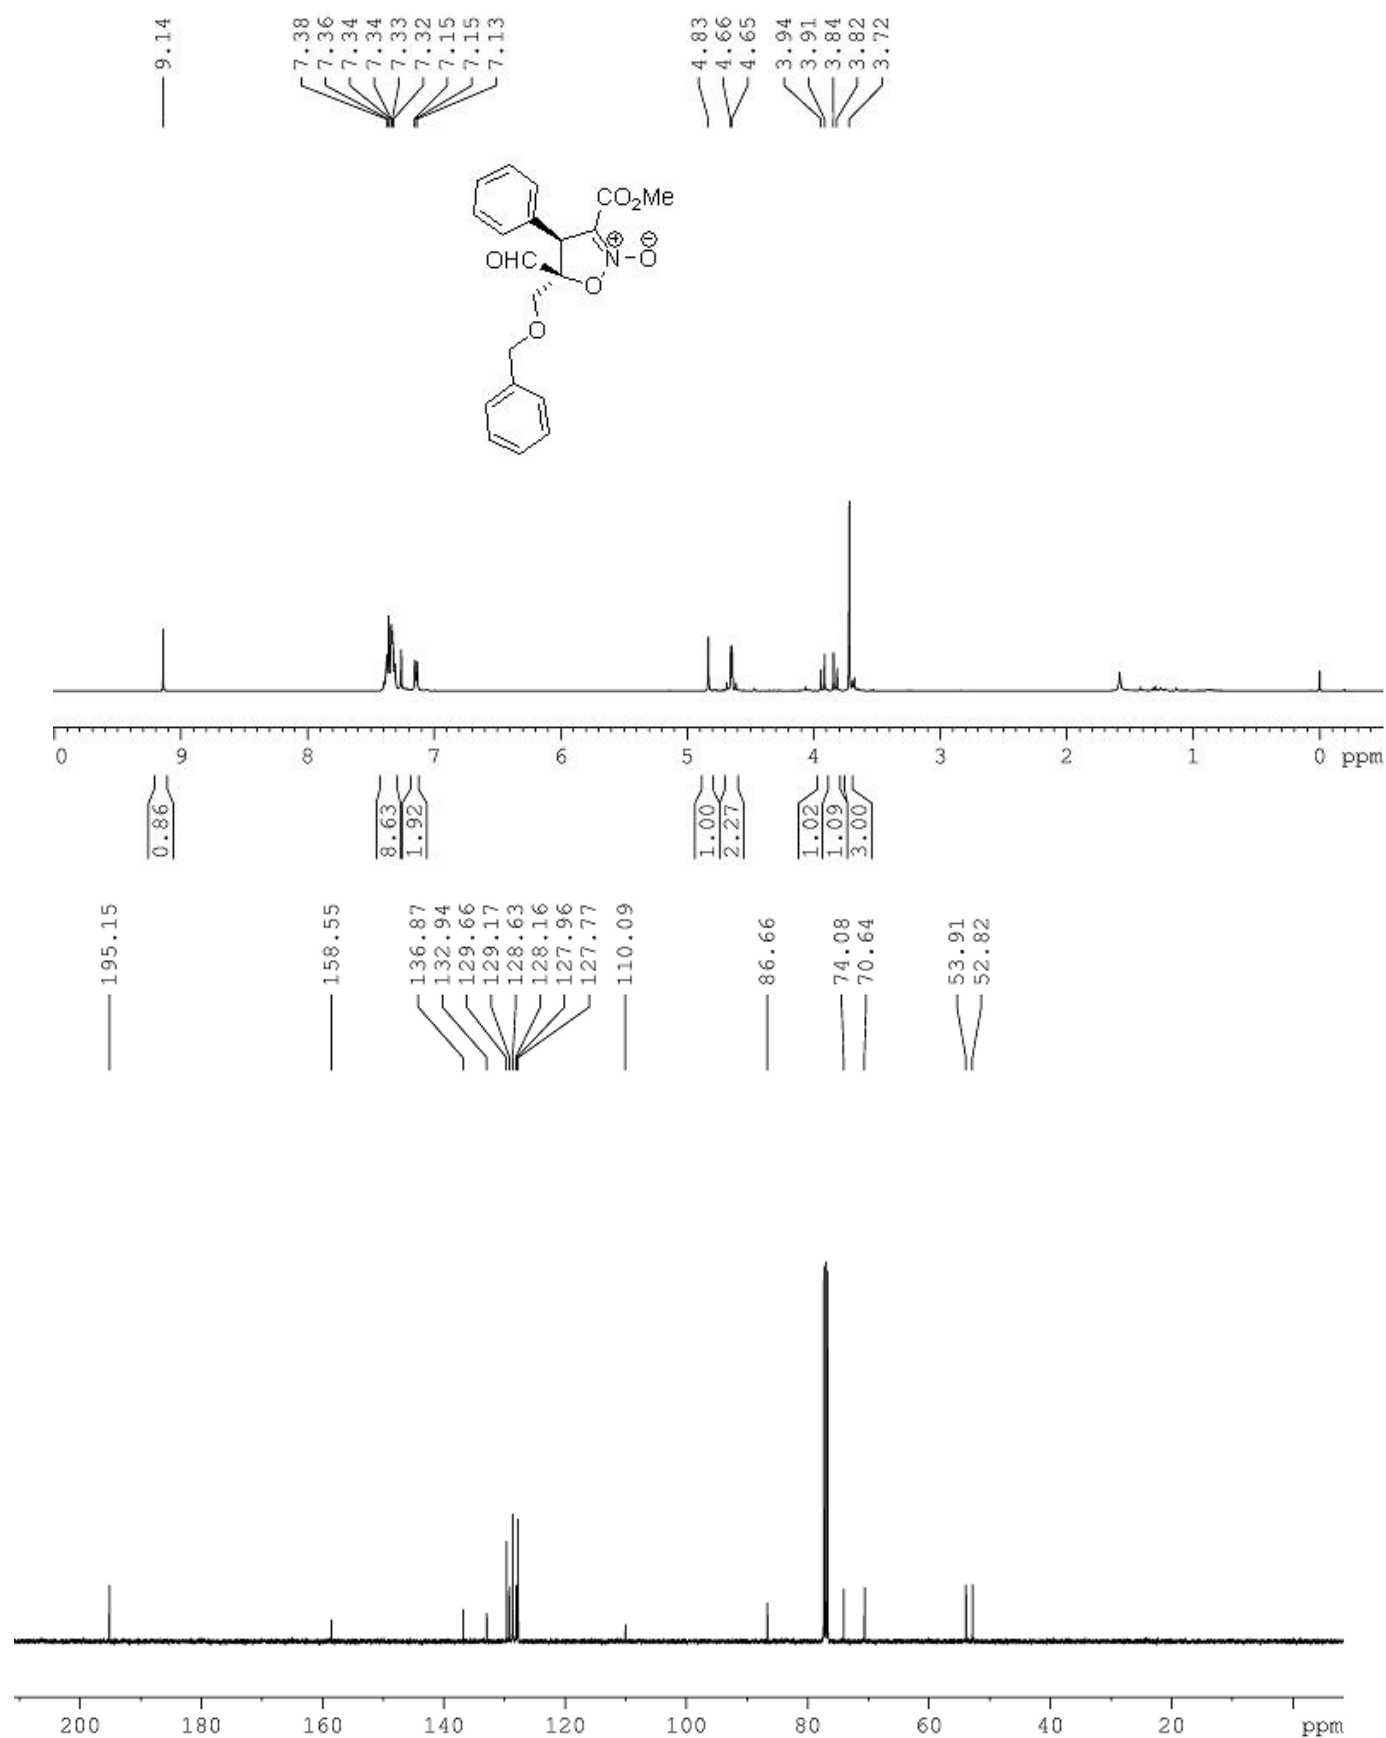

**(4*S*,5*R*)-5-Benzyl-4-(4-chlorophenyl)-5-formyl-3-(methoxycarbonyl)-4,5-dihydroisoxazole 2-oxide (3f)**

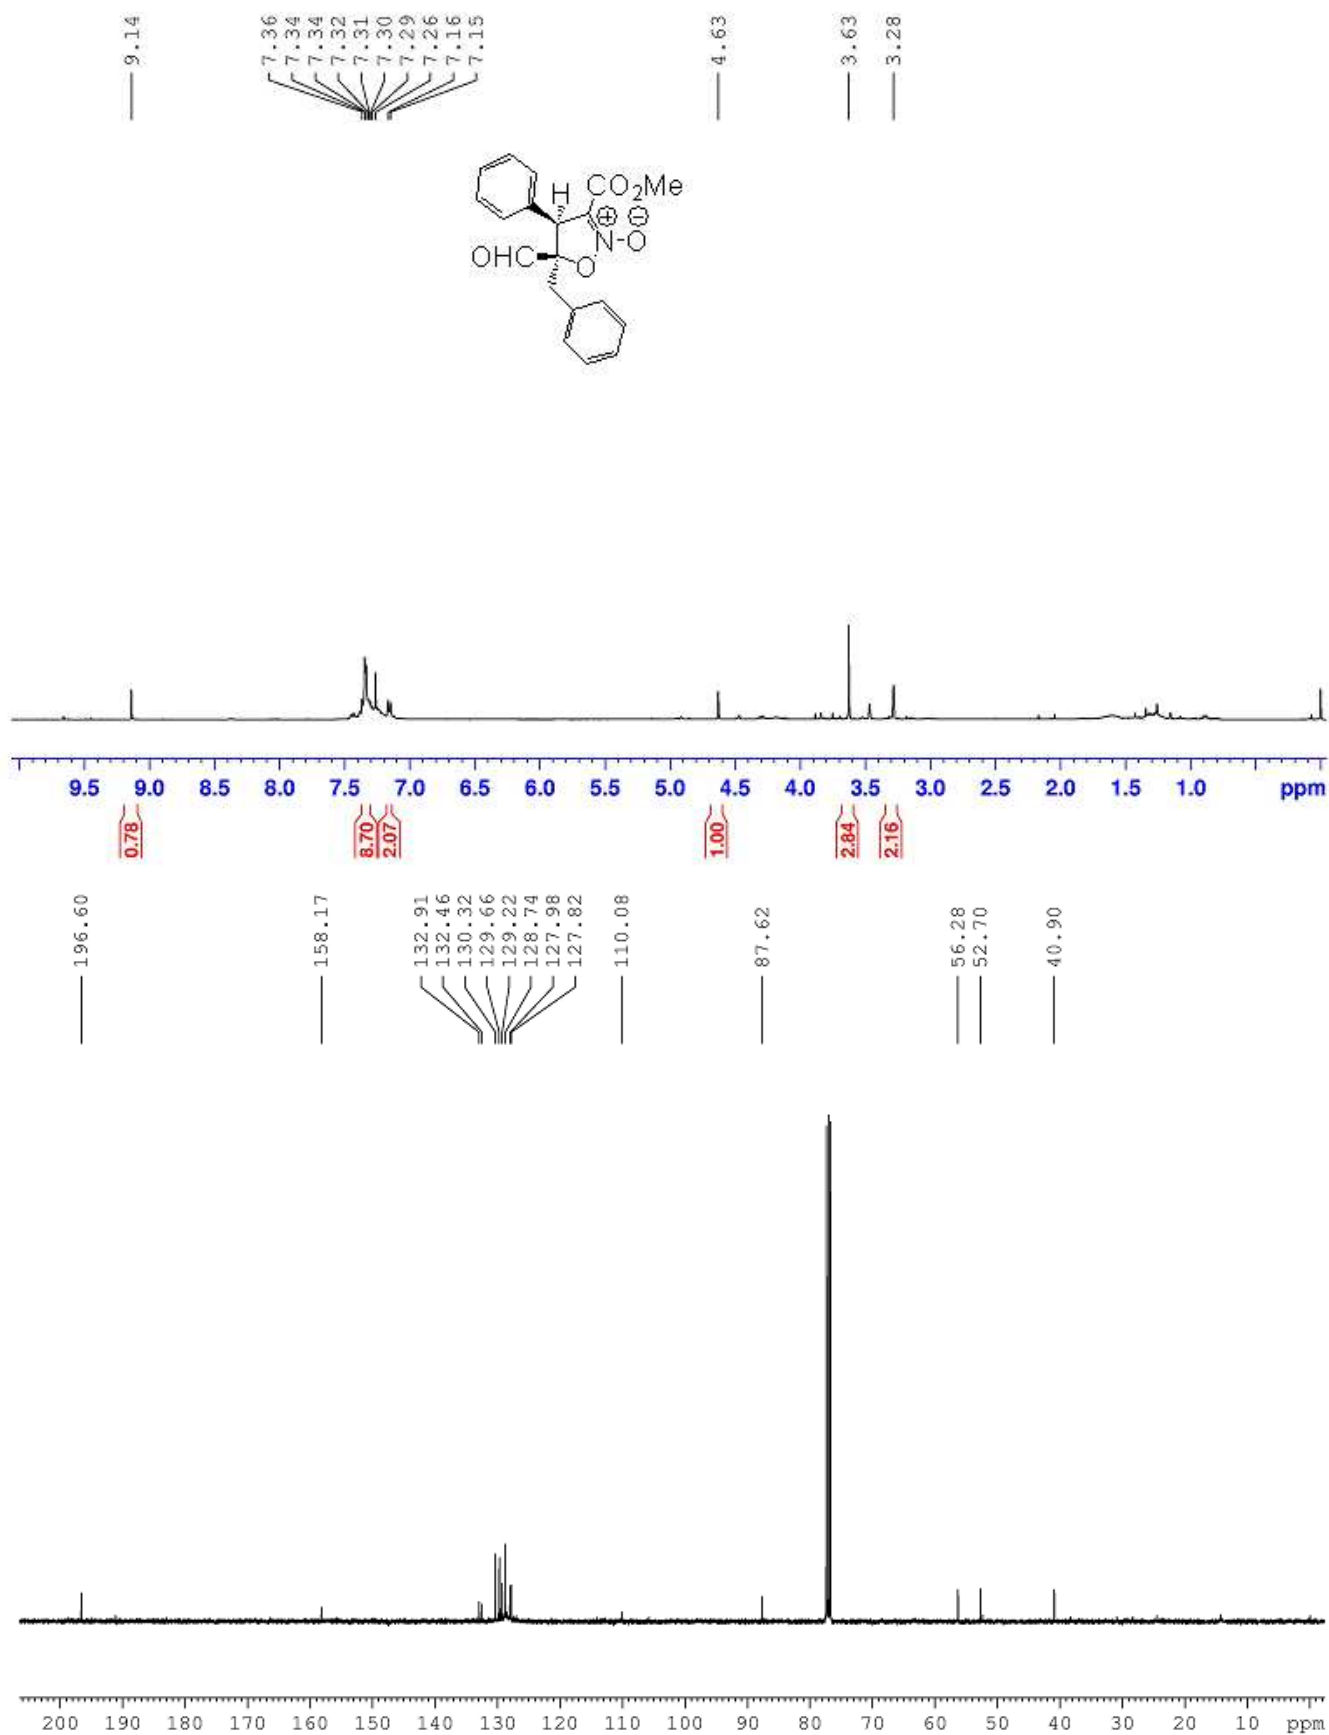

**(4*S*,5*R*)-3-(Ethoxycarbonyl)-5-formyl-4-phenyl-5-propyl-4,5-dihydroisoxazole 2-oxide (3g)**

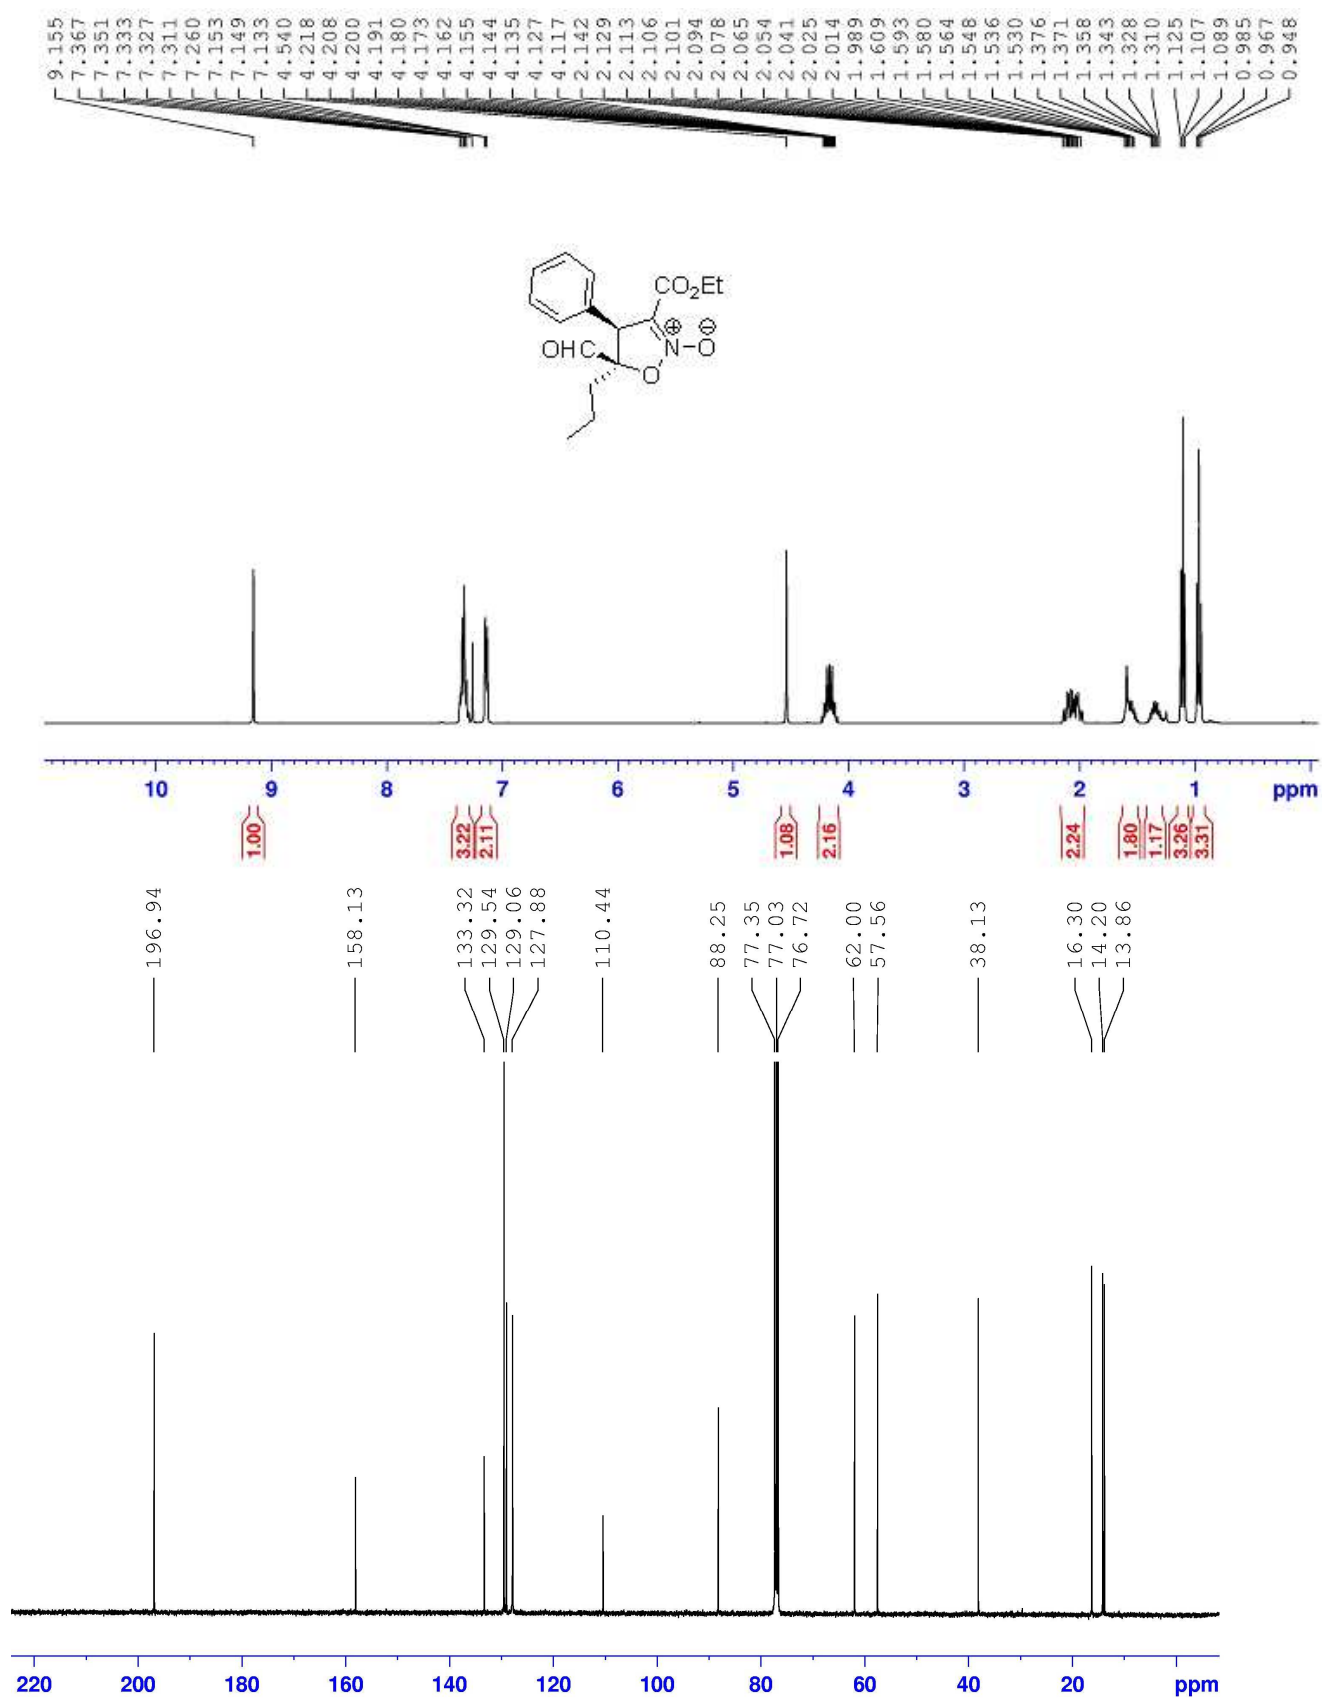

**(4*S*,5*R*)-3-(Ethoxycarbonyl)-5-formyl-5-propyl-4-*o*-tolyl-4,5-dihydroisoxazole 2-oxide (3h)**

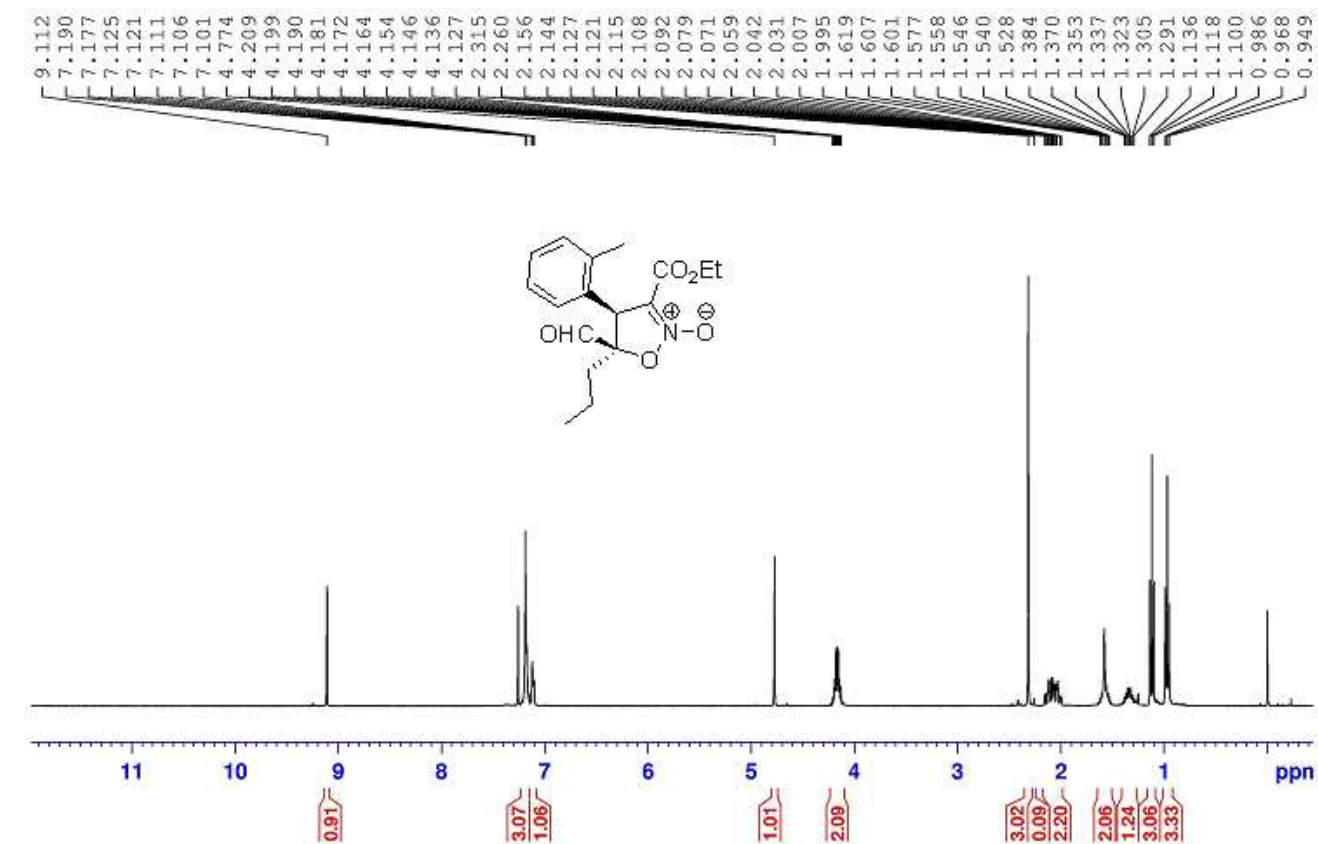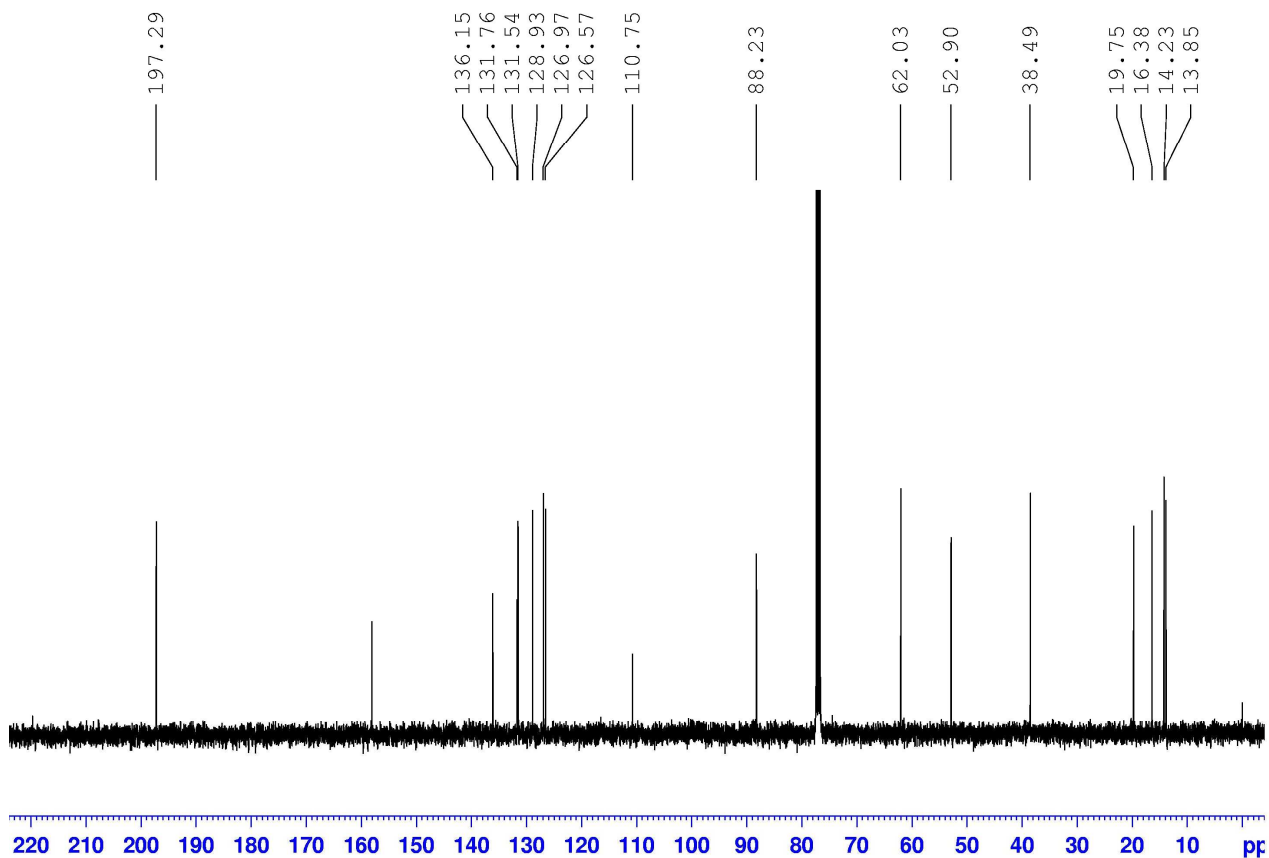

**(4*S*,5*R*)-4-(2-Chlorophenyl)-3-(ethoxycarbonyl)-5-formyl-5-propyl-4,5-dihydroisoxazole 2-oxide (3i)**

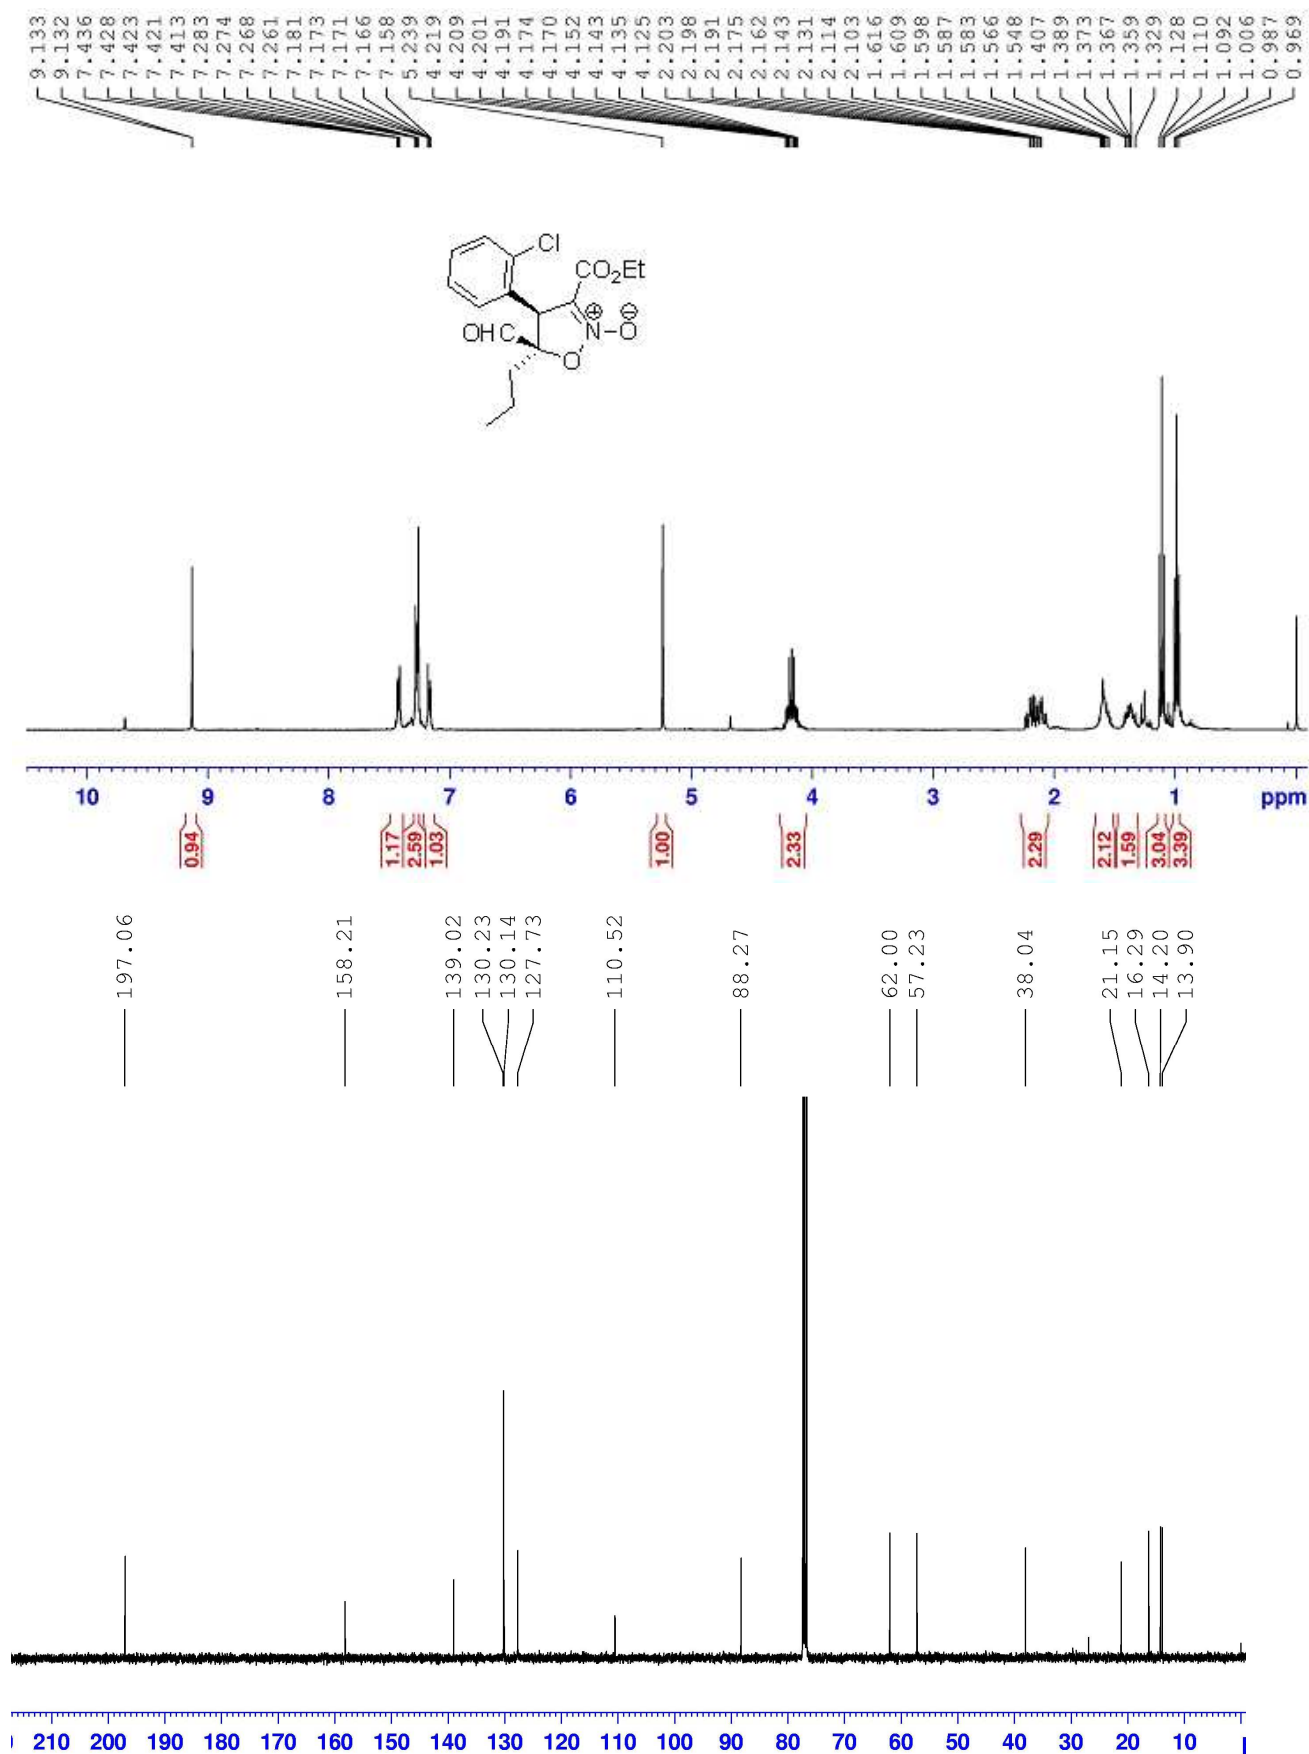

**(4*S*,5*R*)-3-(Ethoxycarbonyl)-5-formyl-5-propyl-4-m-tolyl-4,5-dihydroisoxazole 2-oxide (3j)**

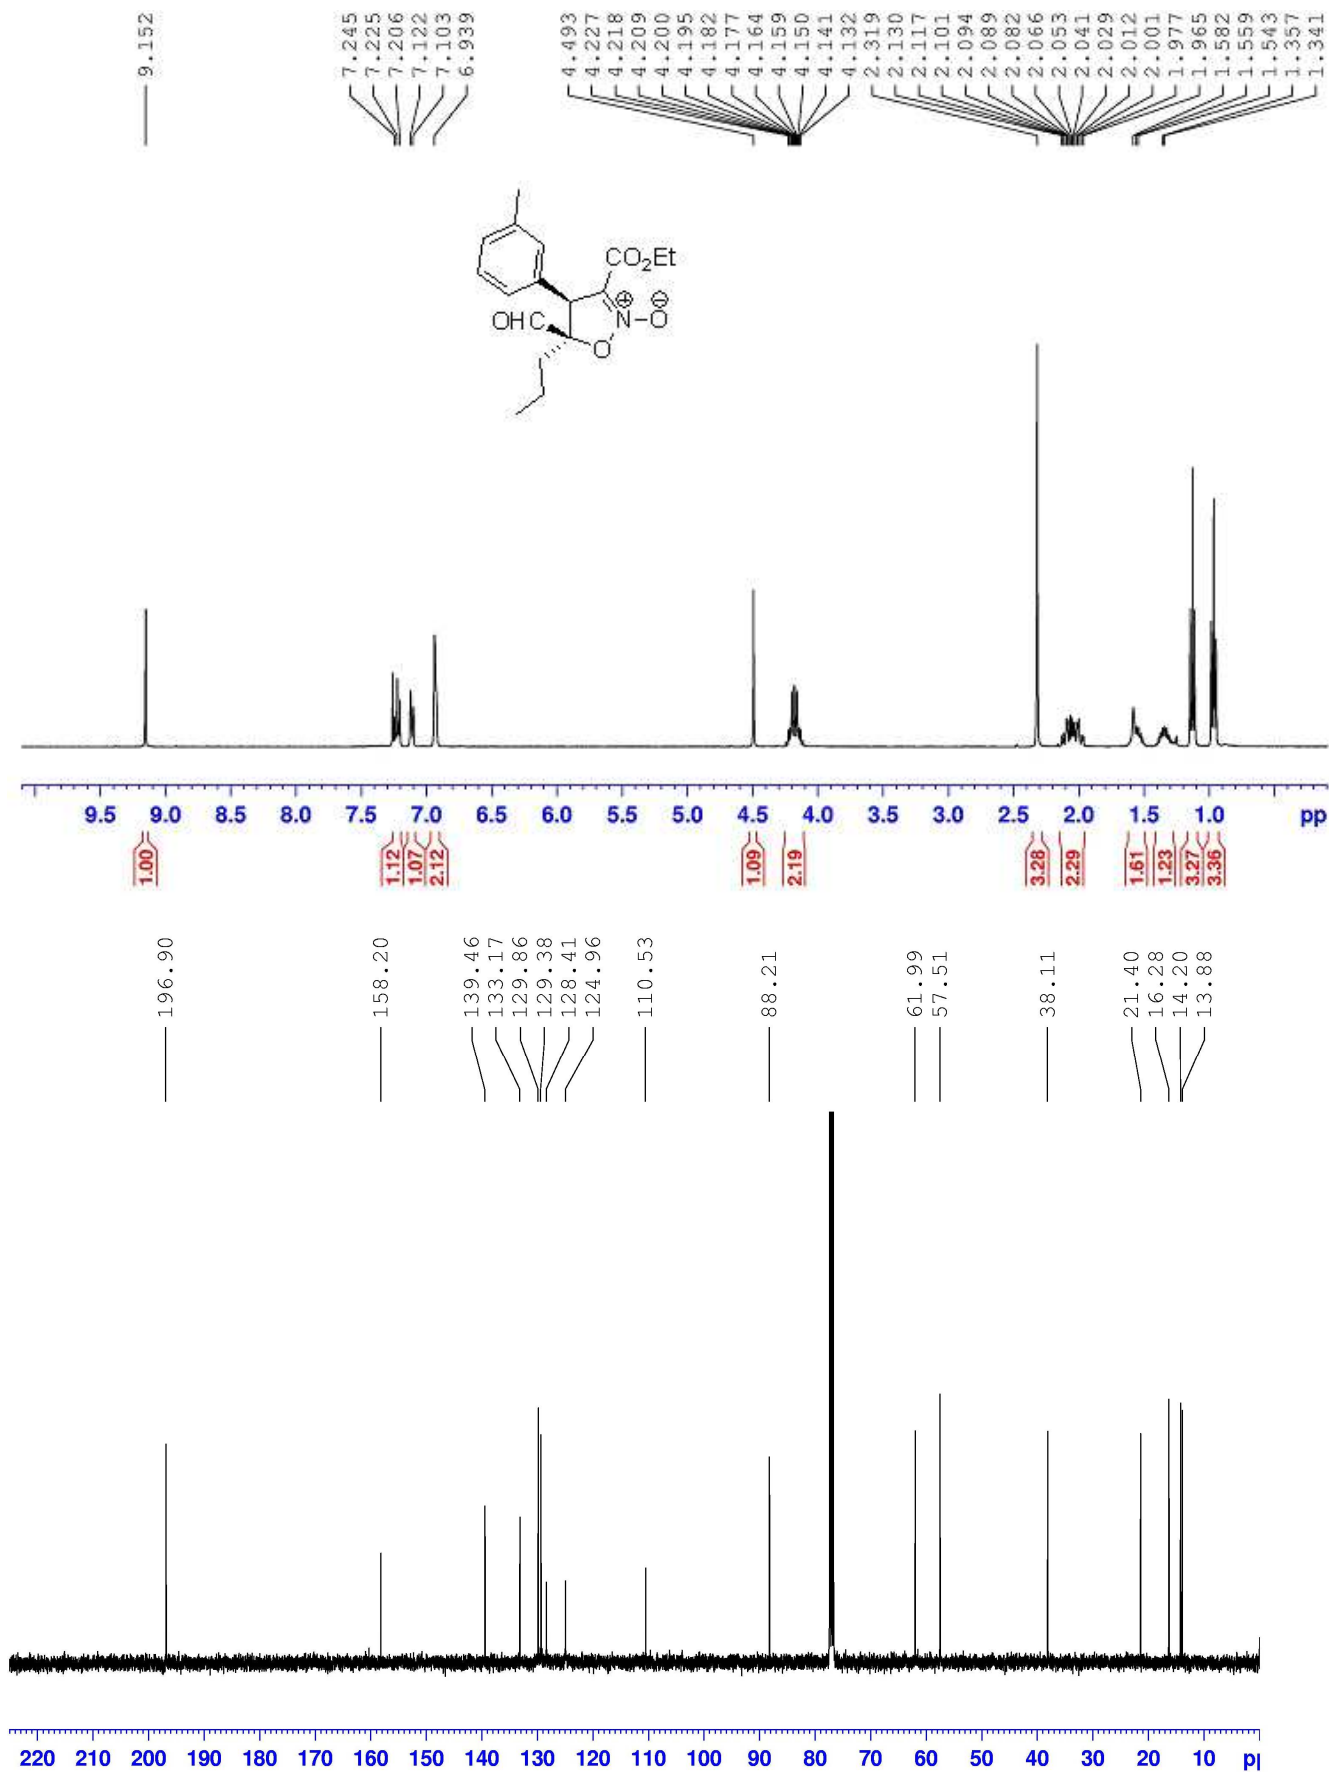

**(4*S*,5*R*)-4-(3-Chlorophenyl)-3-(ethoxycarbonyl)-5-formyl-5-propyl-4,5-dihydroisoxazole 2-oxide (3k)**

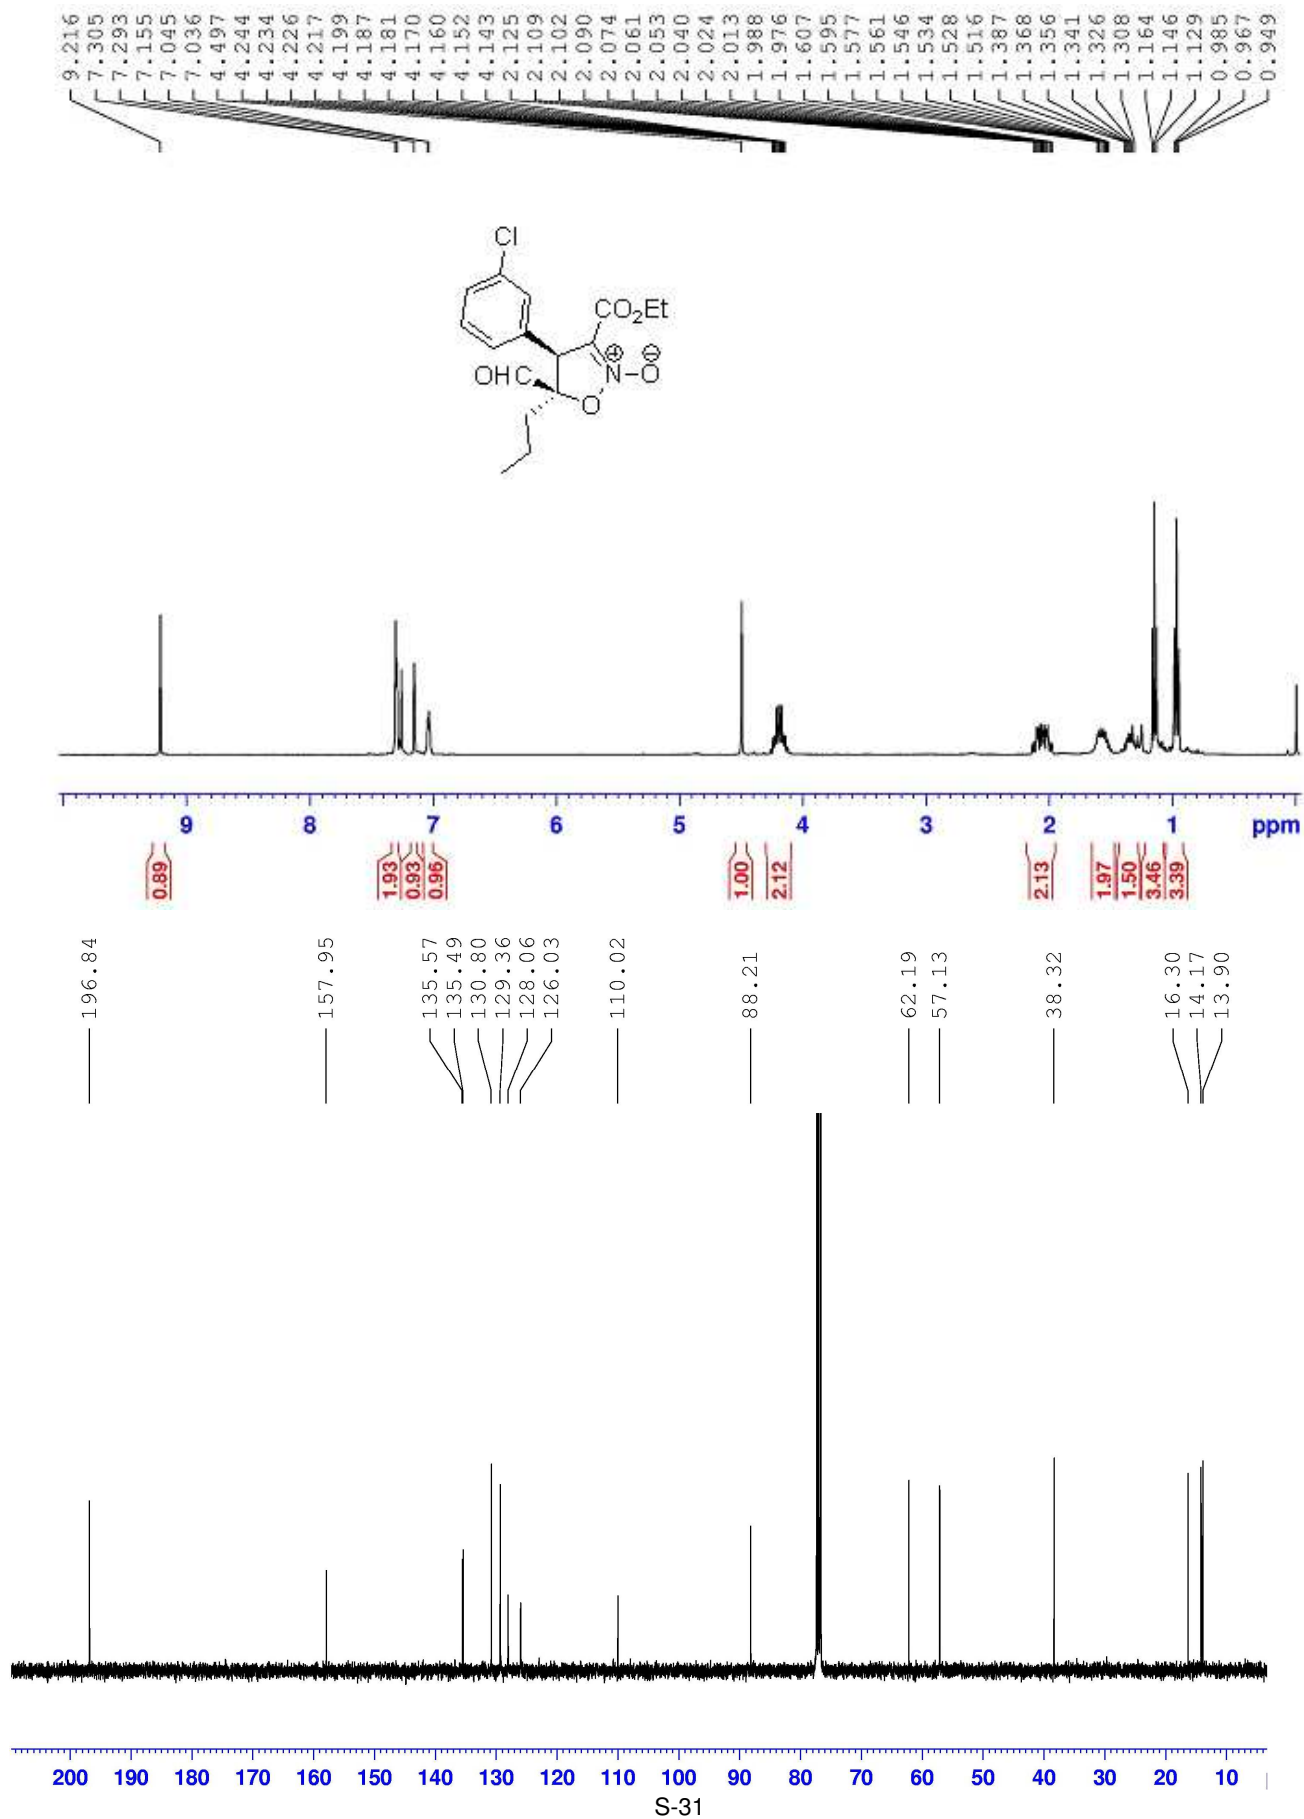

**(4*S*,5*R*)-4-(4-Bromophenyl)-3-(ethoxycarbonyl)-5-formyl-5-propyl-4,5-dihydroisoxazole 2-oxide (3l)**

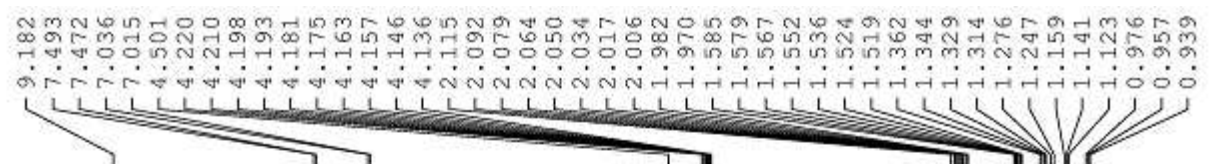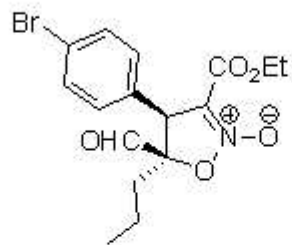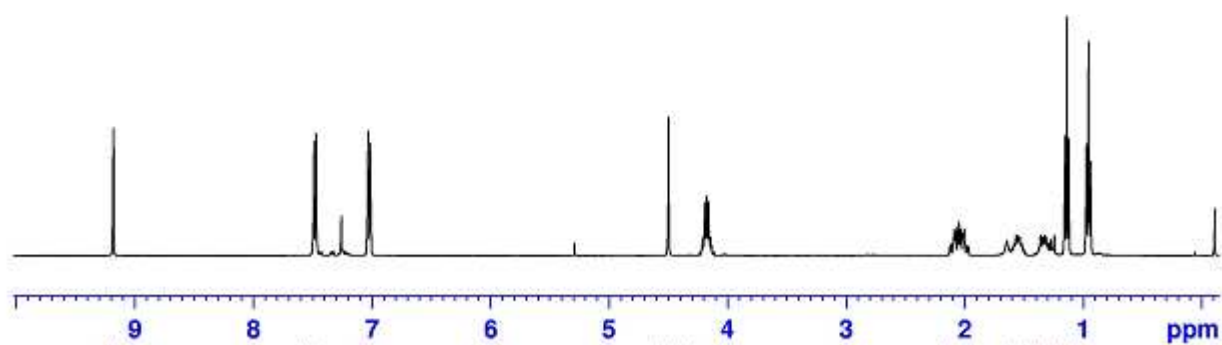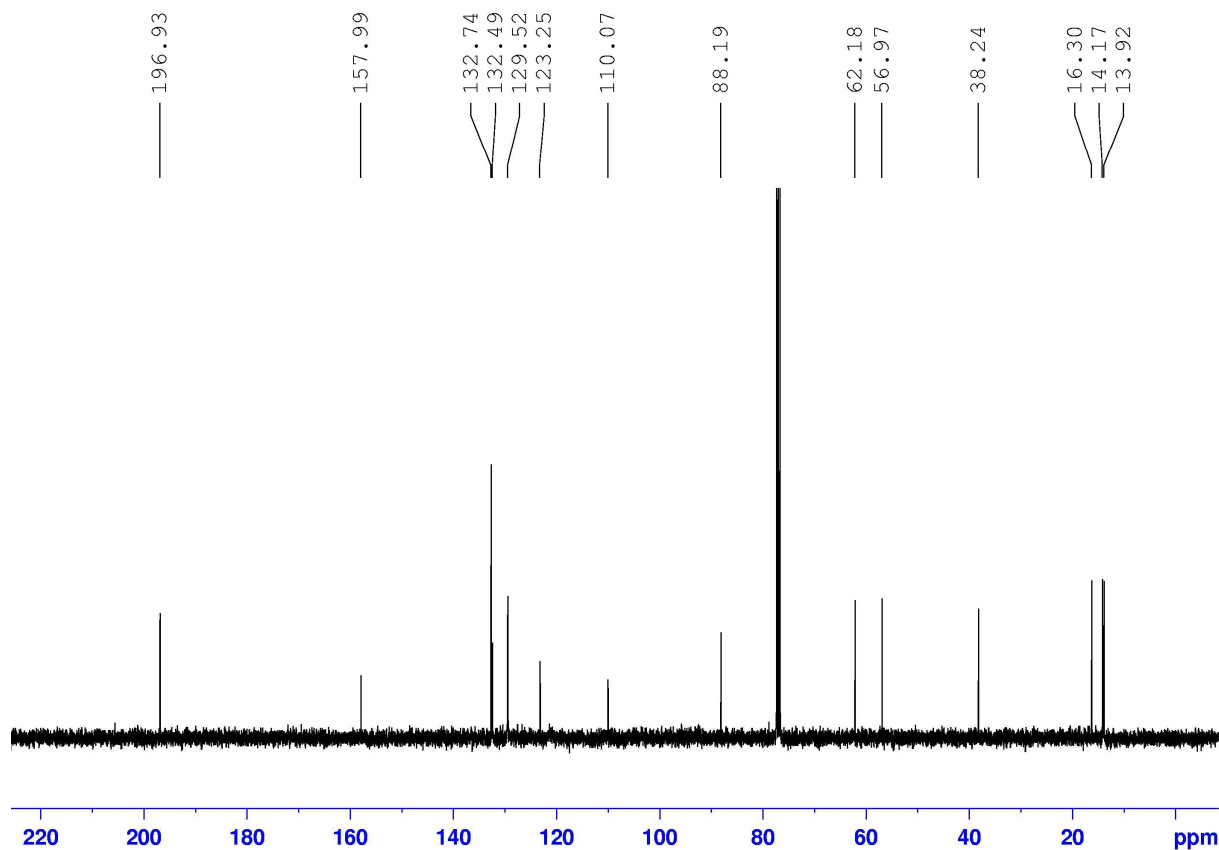



**(4*S*,5*R*)-3-(Ethoxycarbonyl)-5-formyl-5-propyl-4-*p*-tolyl-4,5-dihydroisoxazole 2-oxide (3m)**

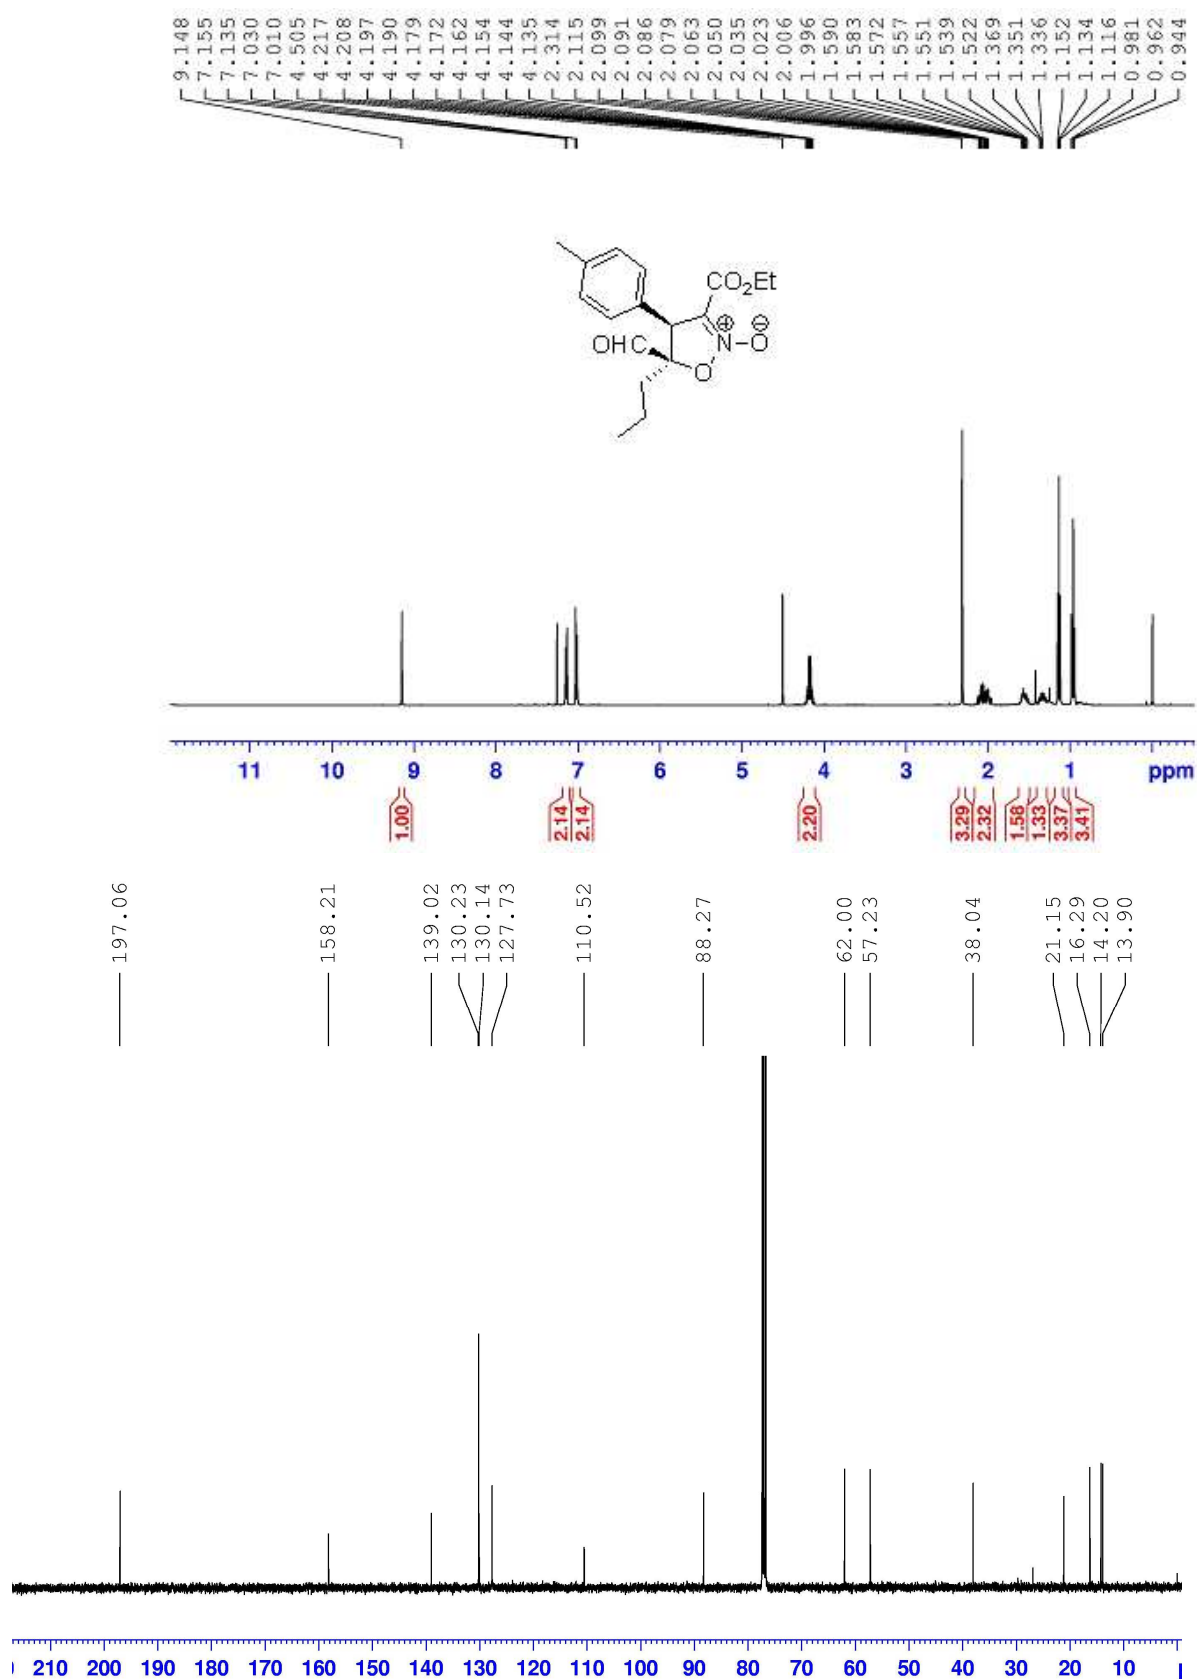

**(4*S*,5*R*)-4-(4-Methoxyphenyl)-3-(ethoxycarbonyl)-5-formyl-5-propyl-4,5-dihydroisoxazole 2-oxide (3n)**

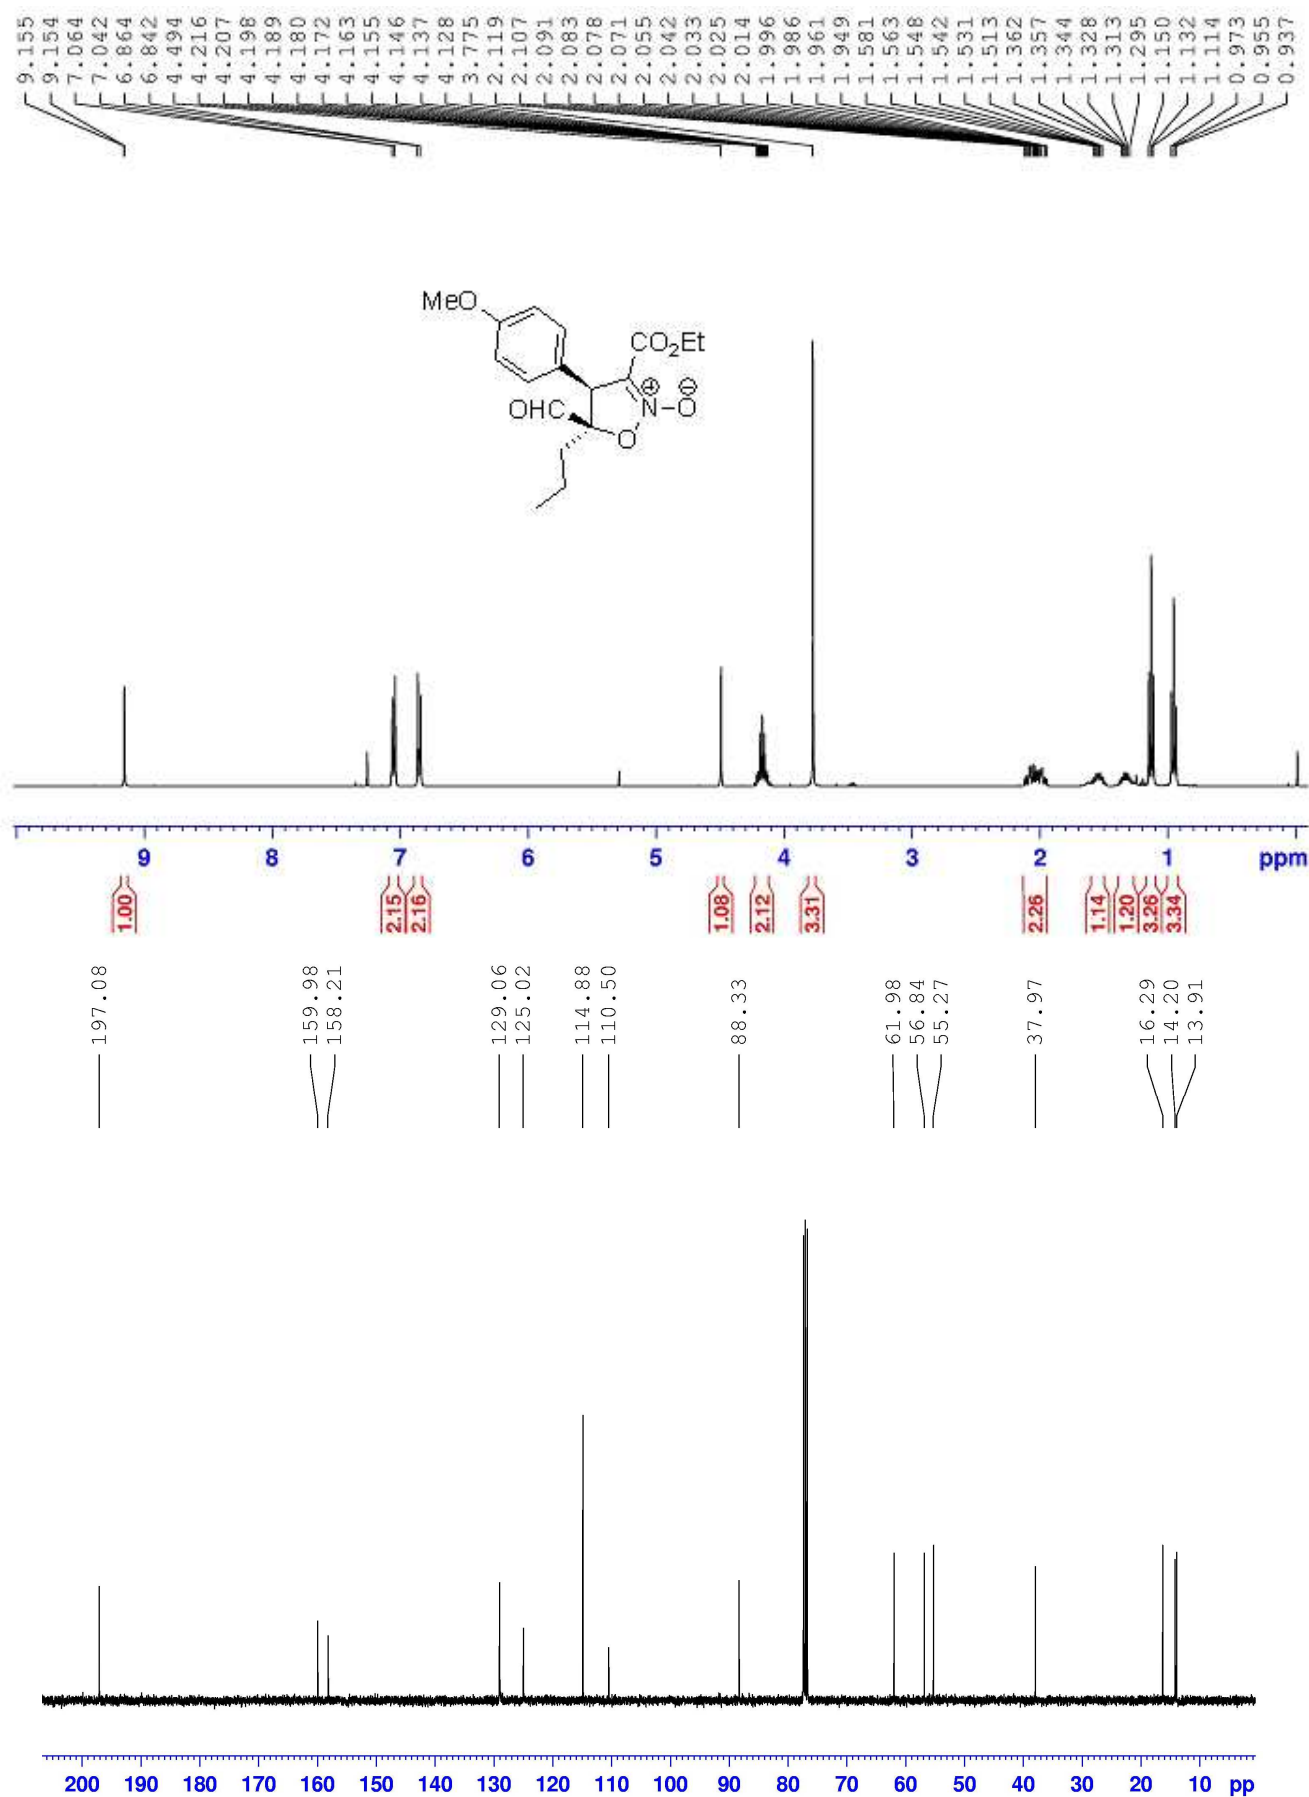

**(4*S*,5*R*)-3-(Ethoxycarbonyl)-5-formyl-4-(naphthalen-1-yl)-5-propyl-4,5-dihydroisoxazole 2-oxide (3o)**

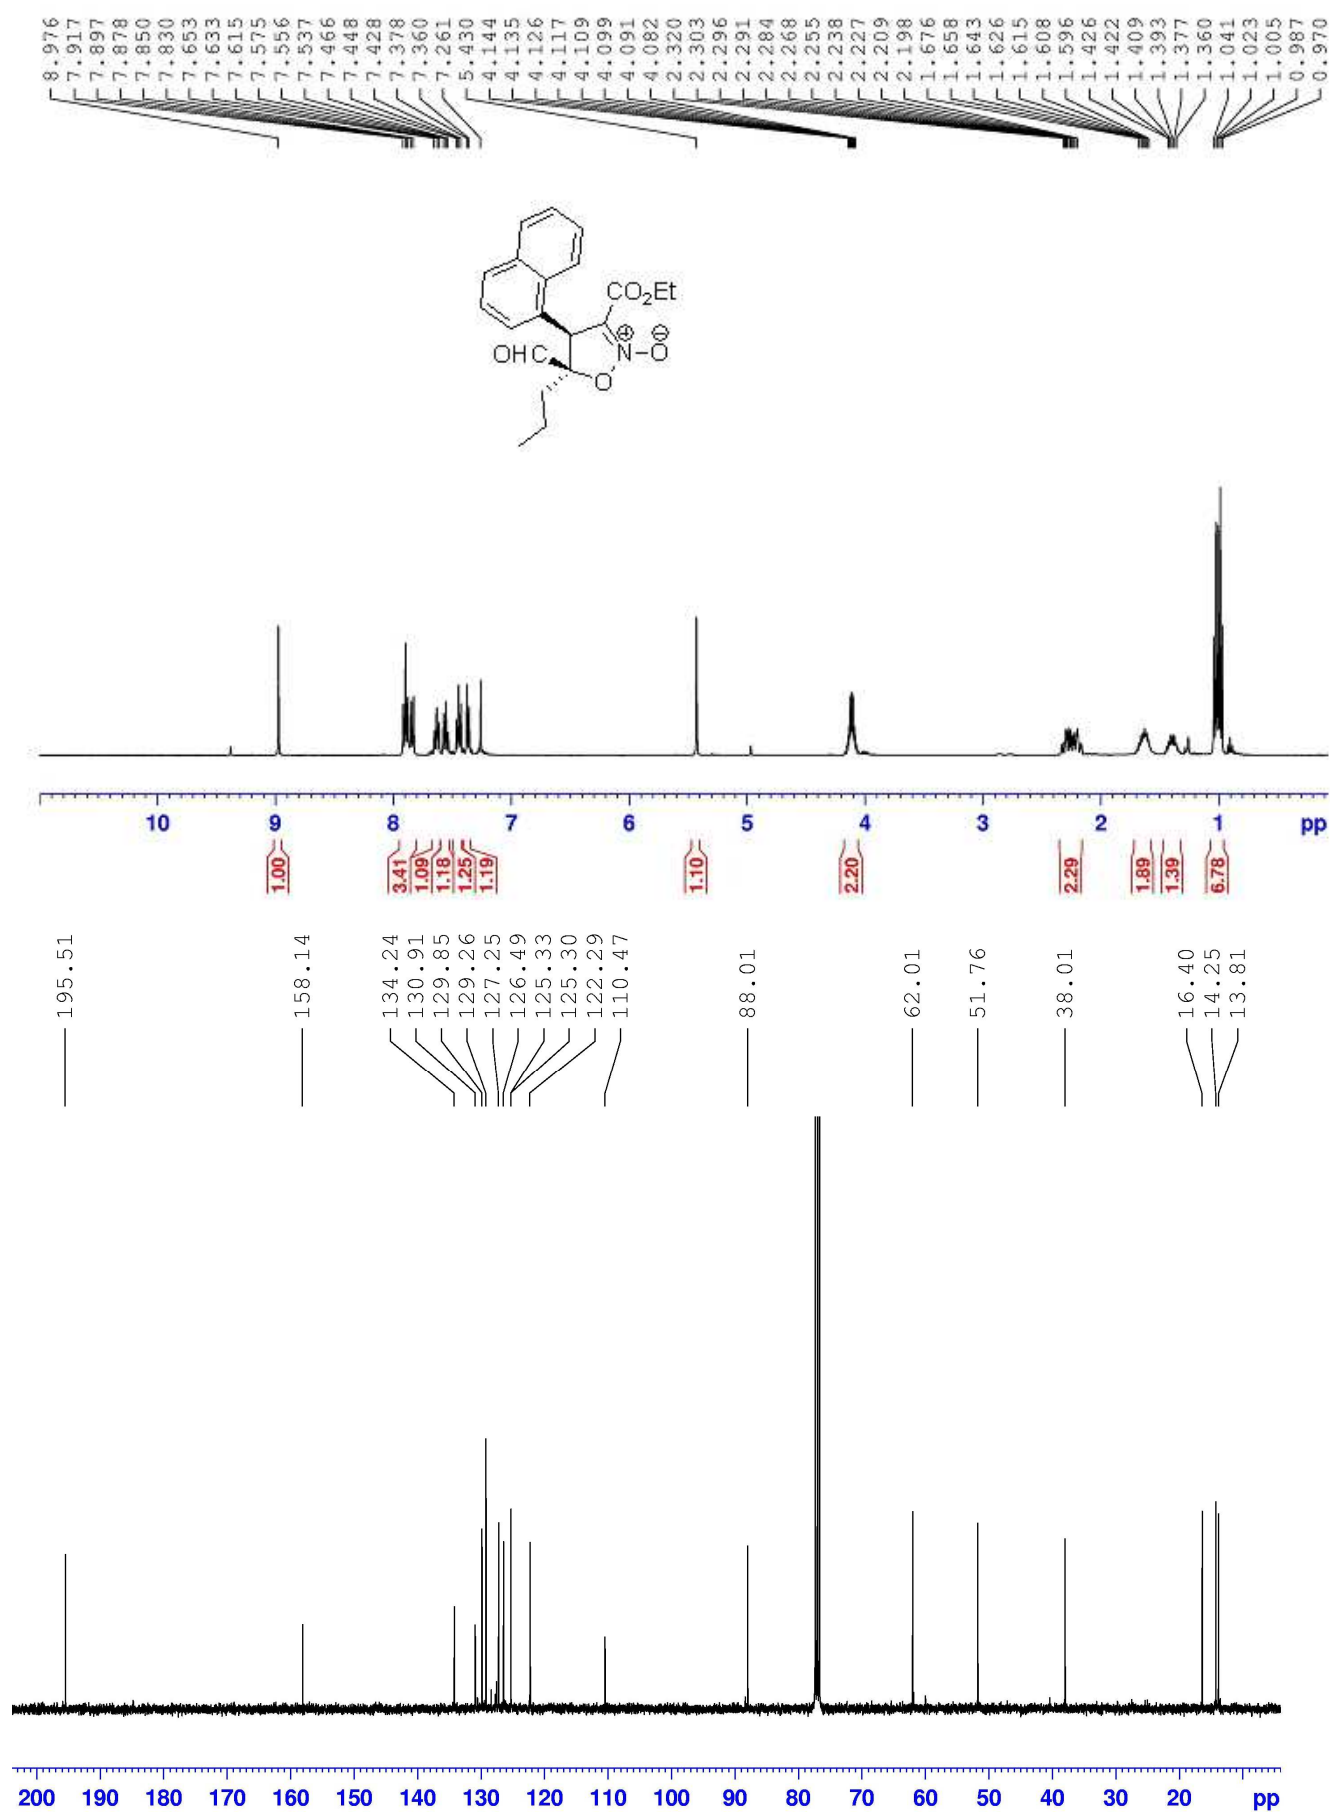

**(4*S*,5*R*)-5-Formyl-3-(methoxycarbonyl)-4-(naphthalen-2-yl)-5-propyl-4,5-dihydroisoxazole 2-oxide (3p)**

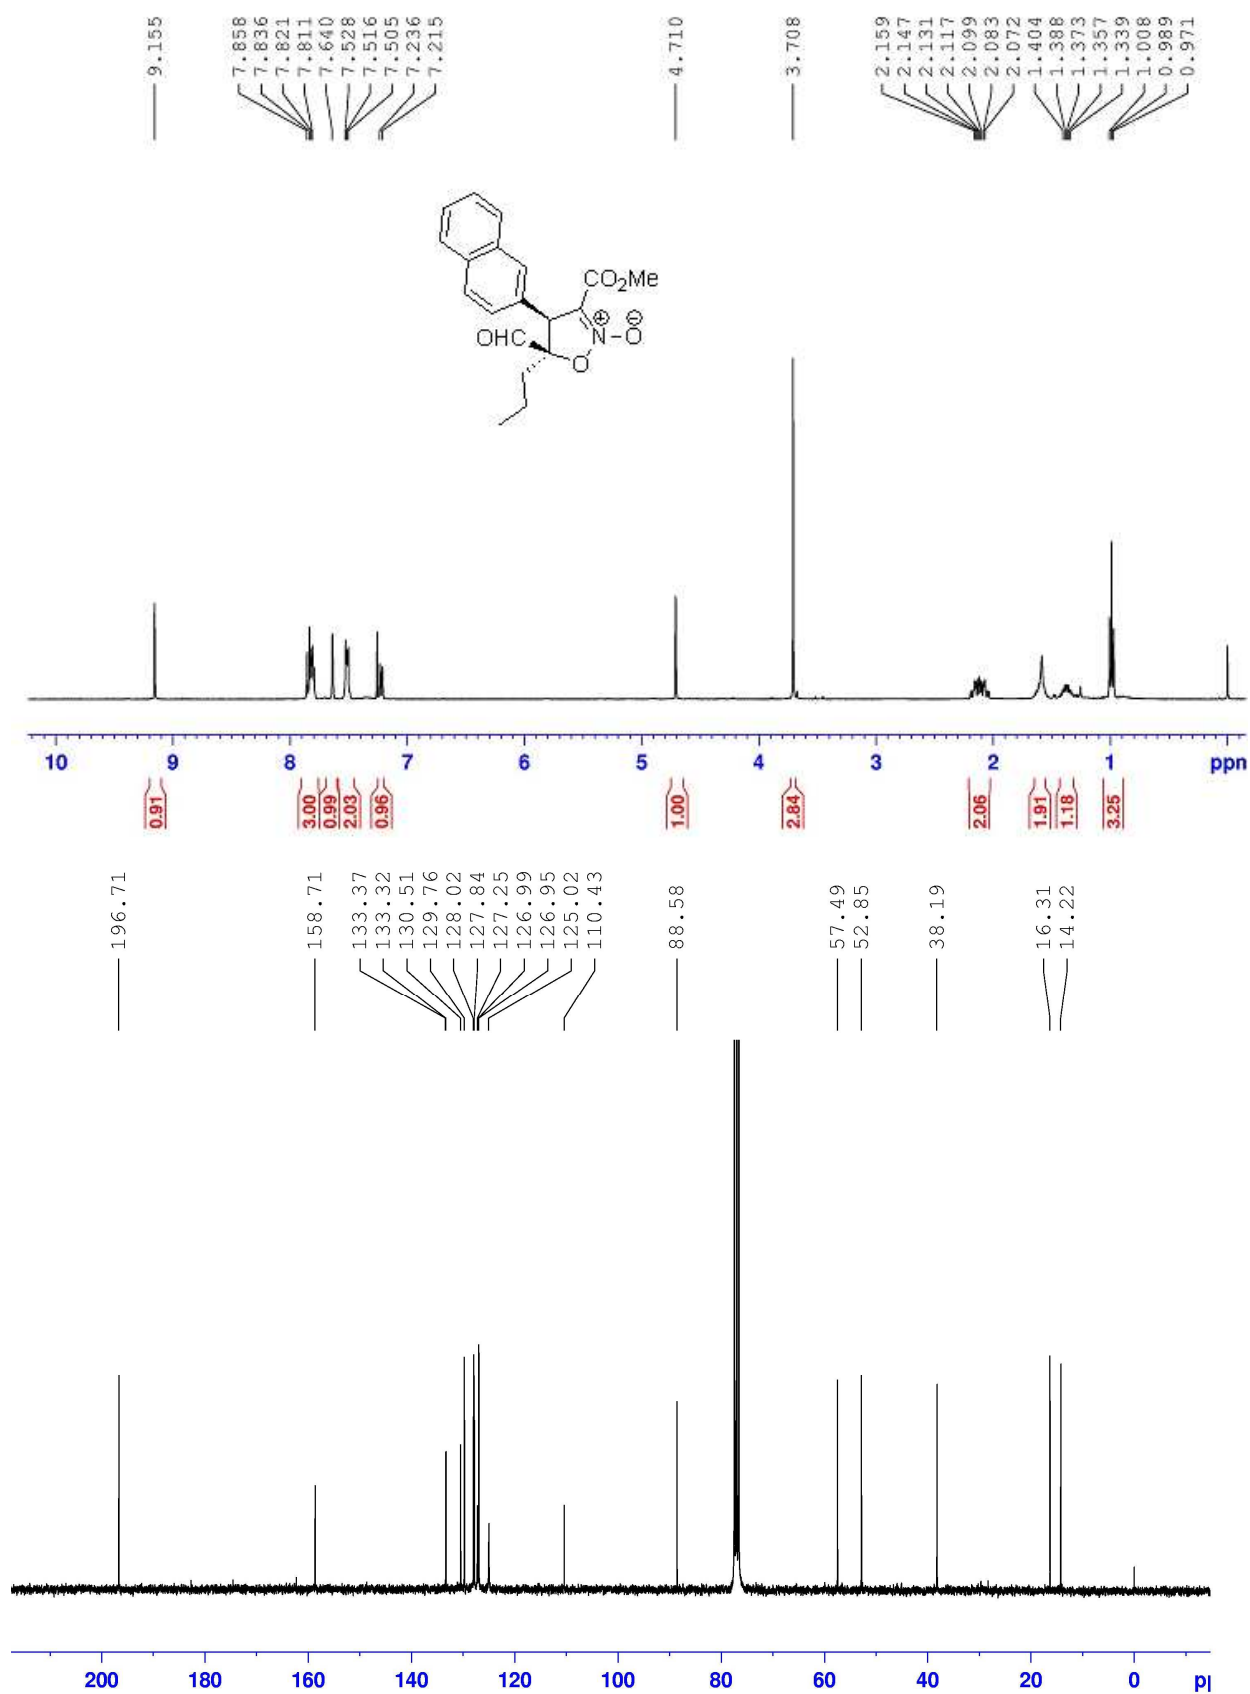

**(4*S*,5*R*)-3-(Ethoxycarbonyl)-5-formyl-4-(furan-3-yl)-5-butyl-4,5-dihydroisoxazole-2-oxide (3q)**

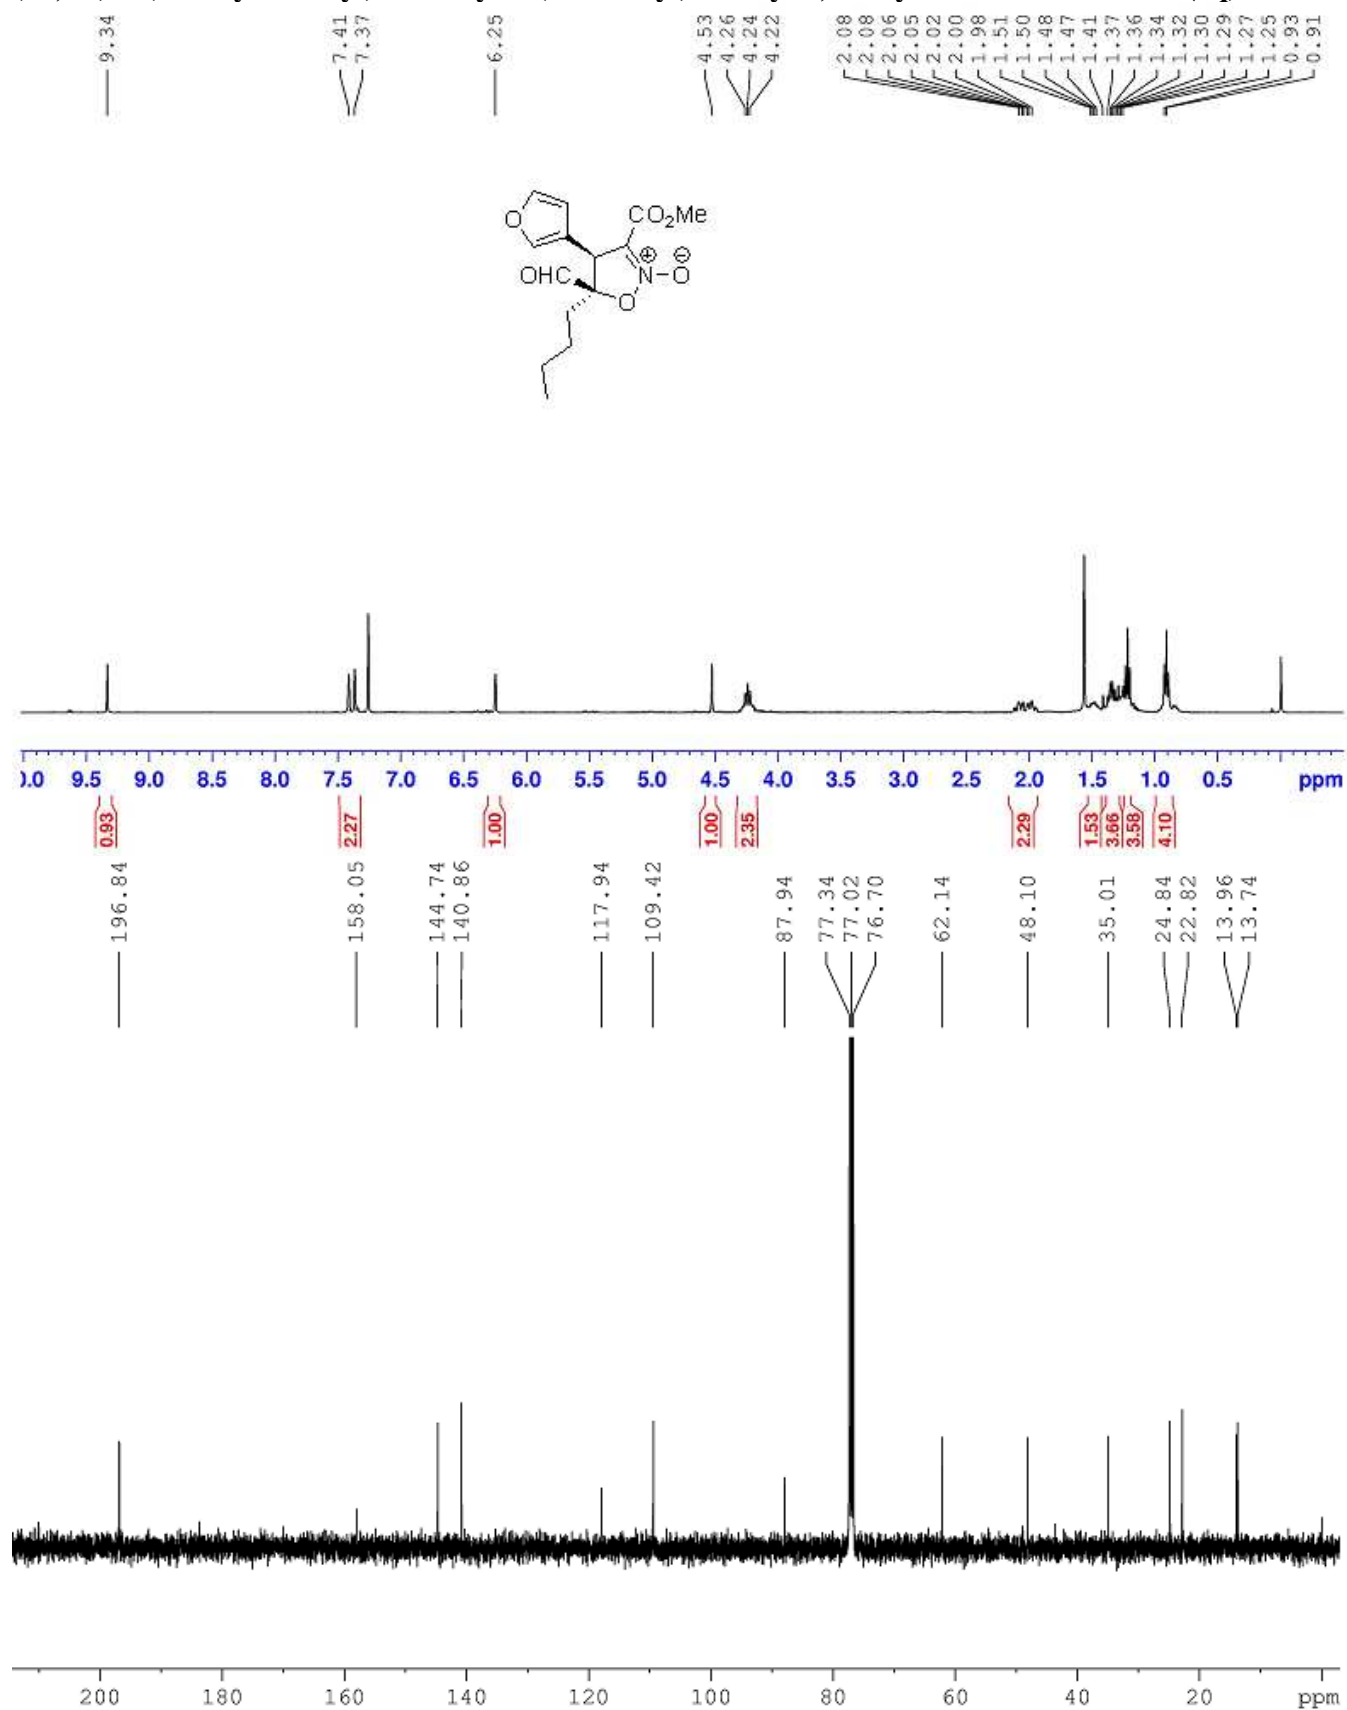

**(4*S*,5*R*)-3-(Ethoxycarbonyl)-5-formyl-4-(furan-2-yl)-5-propyl-4,5-dihydroisoxazole 2-oxide (3r)**

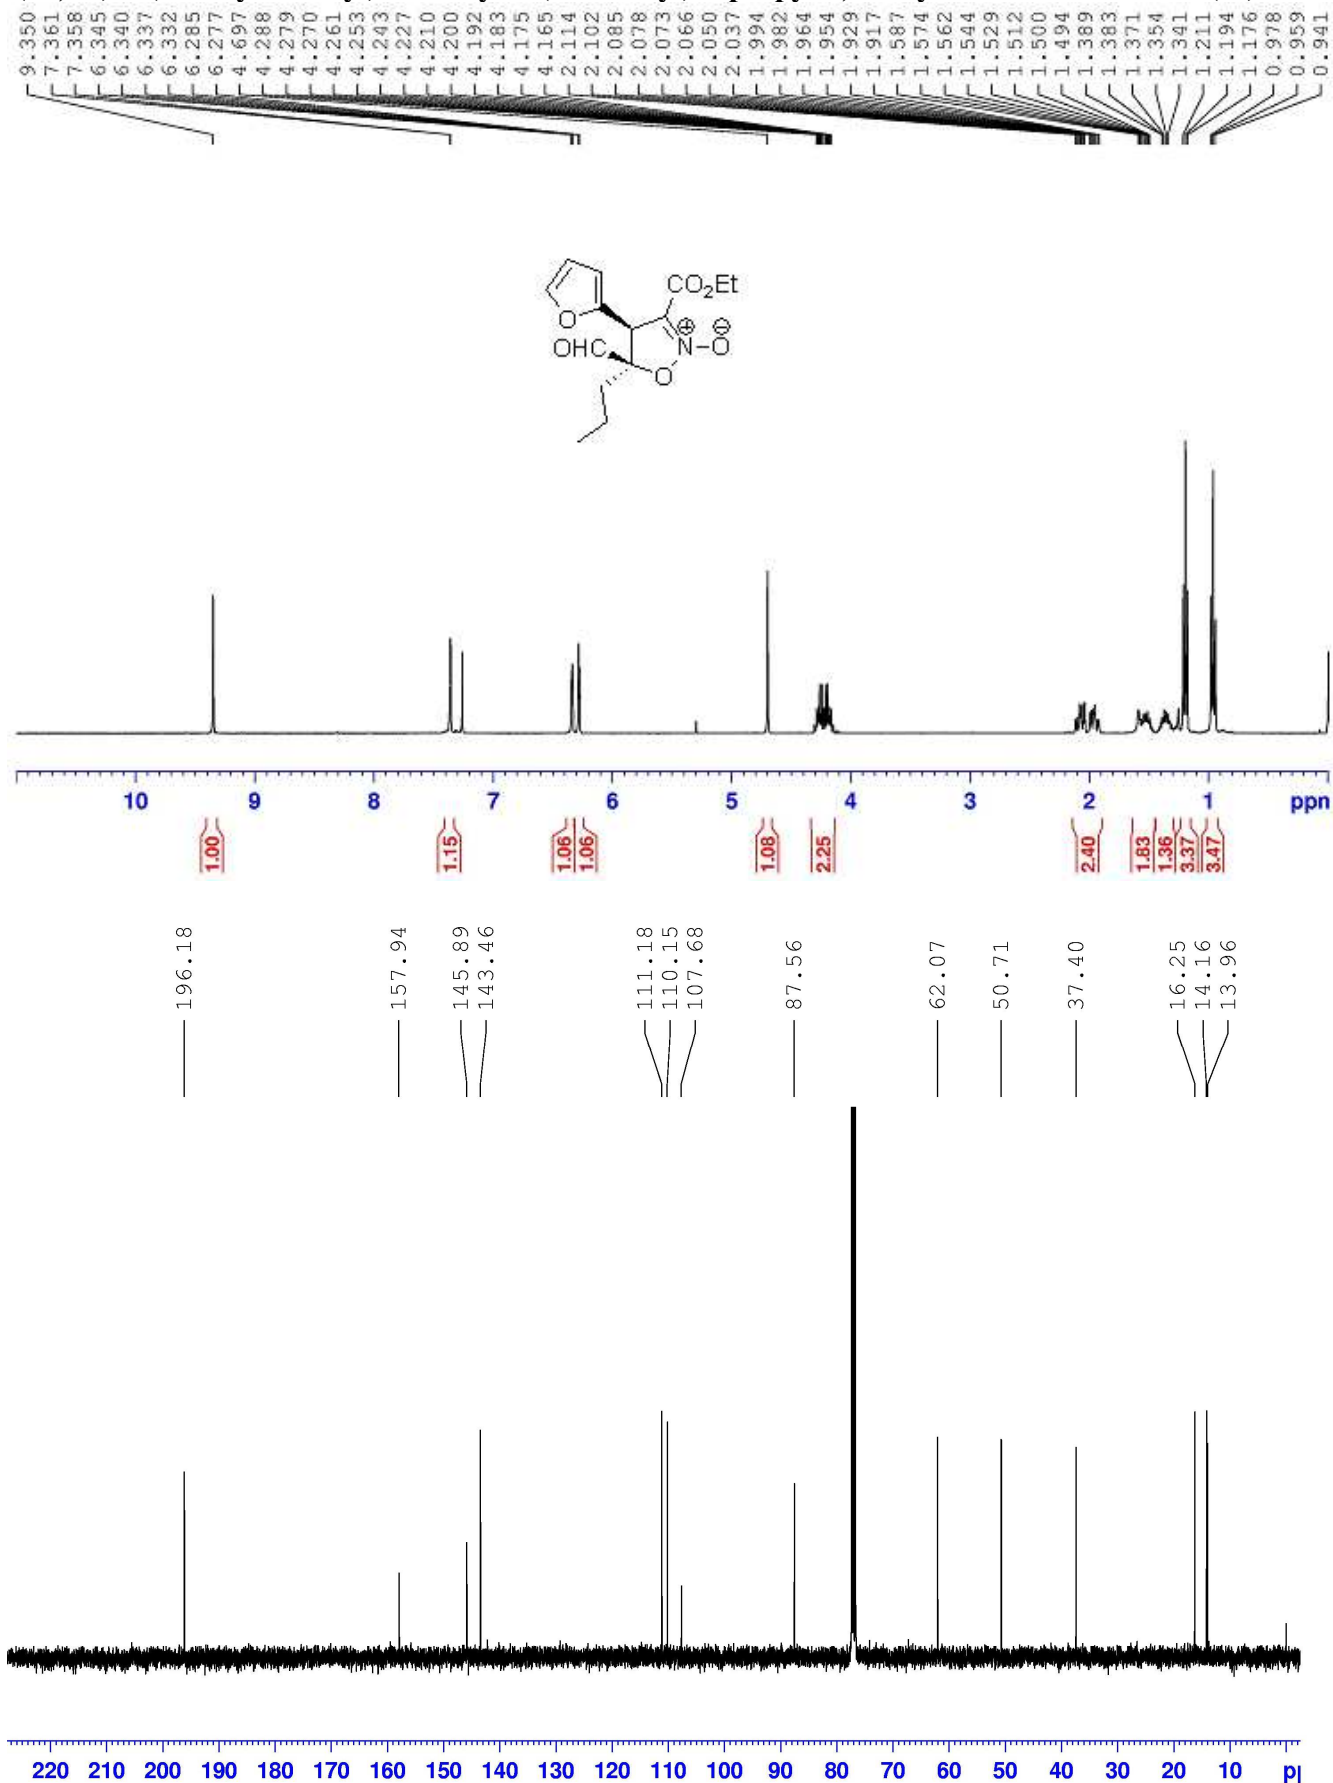

**(4*S*,5*R*)-5-Butyl-5-((tert-butyldimethylsilyloxy)methyl)-3-(methoxycarbonyl)-4-phenyl-4,5-dihydroisoxazole 2-oxide (5)**

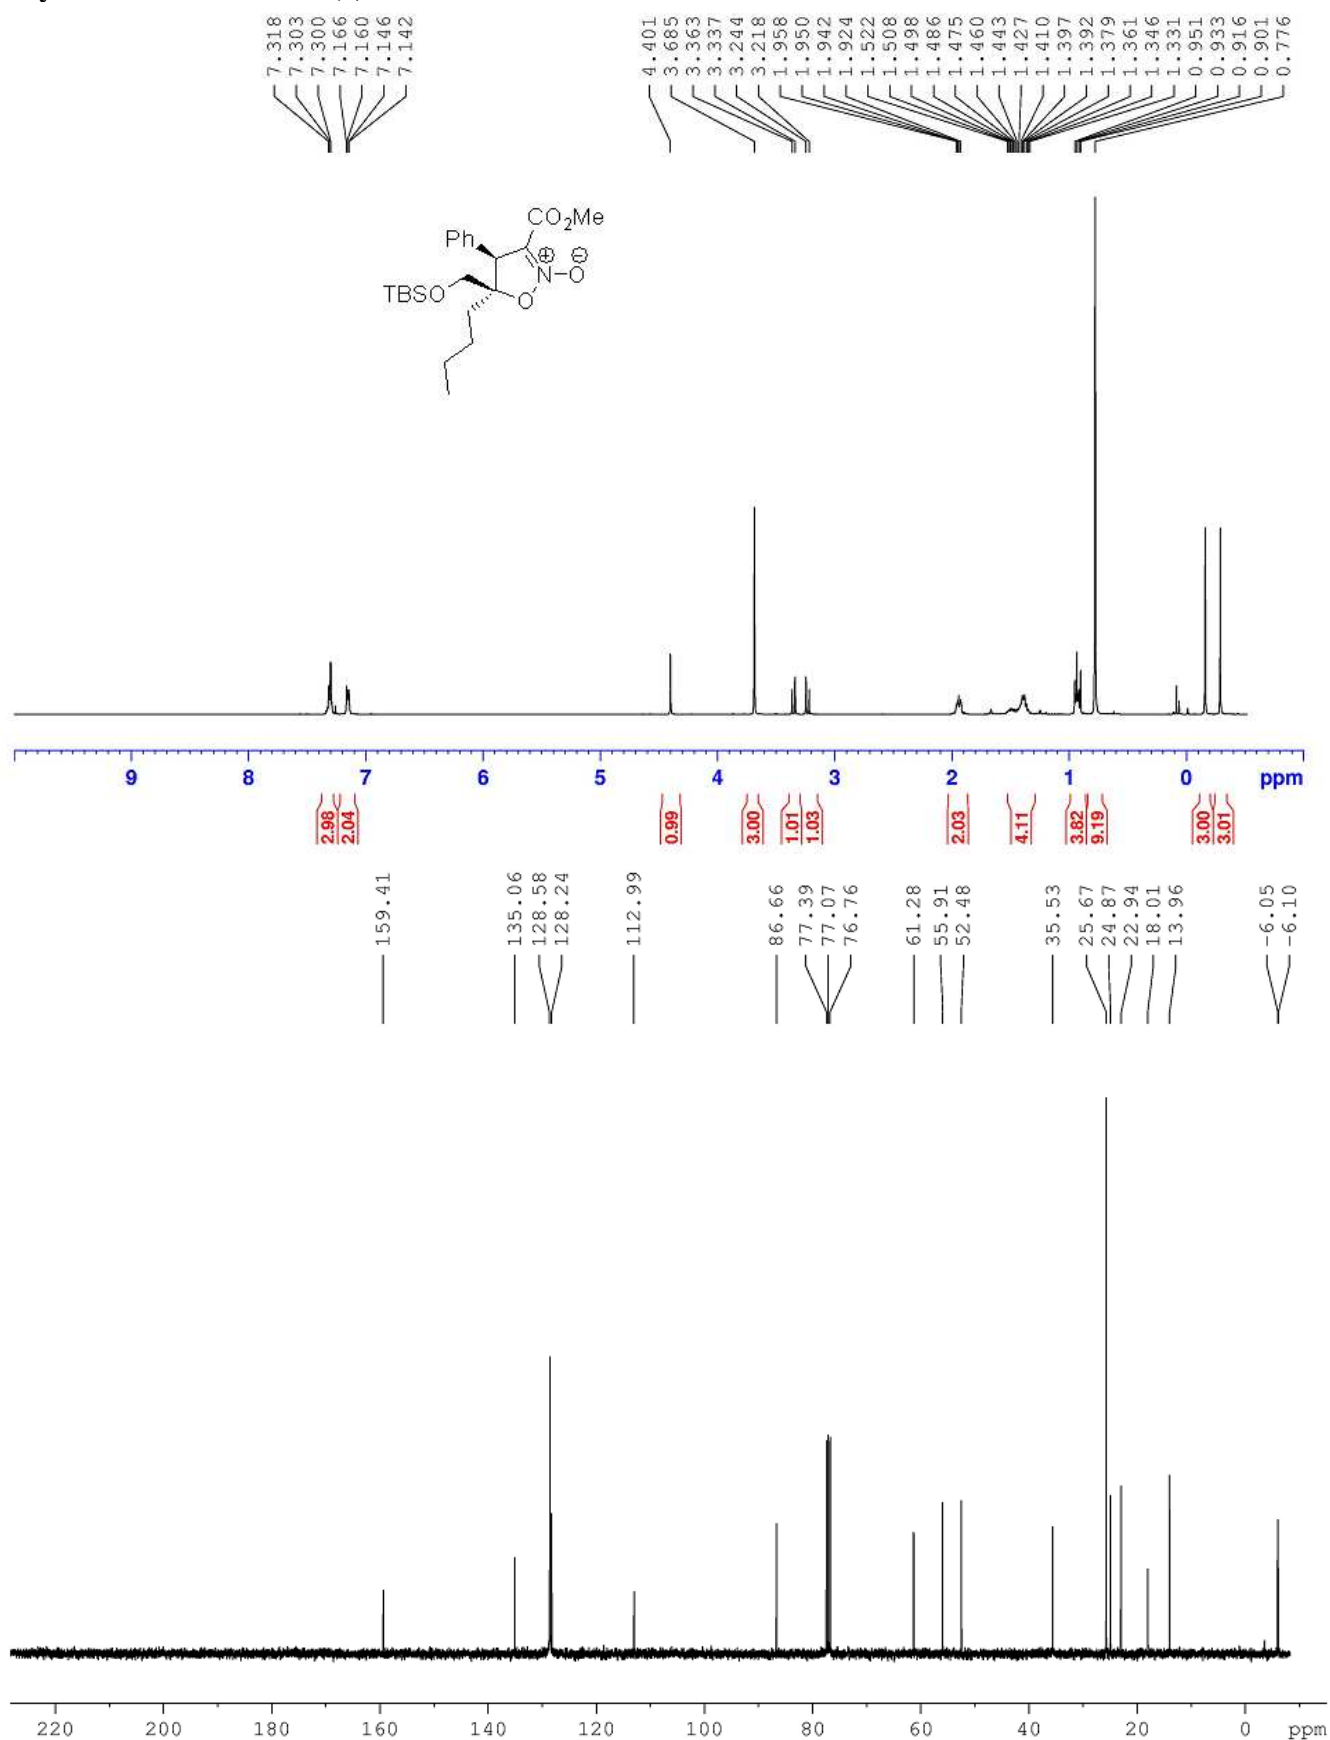



(4S,5R)-Methyl  
carboxylate (6)

5-butyl-5-((tert-butyldimethylsilyloxy)methyl)-4-phenyl-4,5-dihydroisoxazole-3-

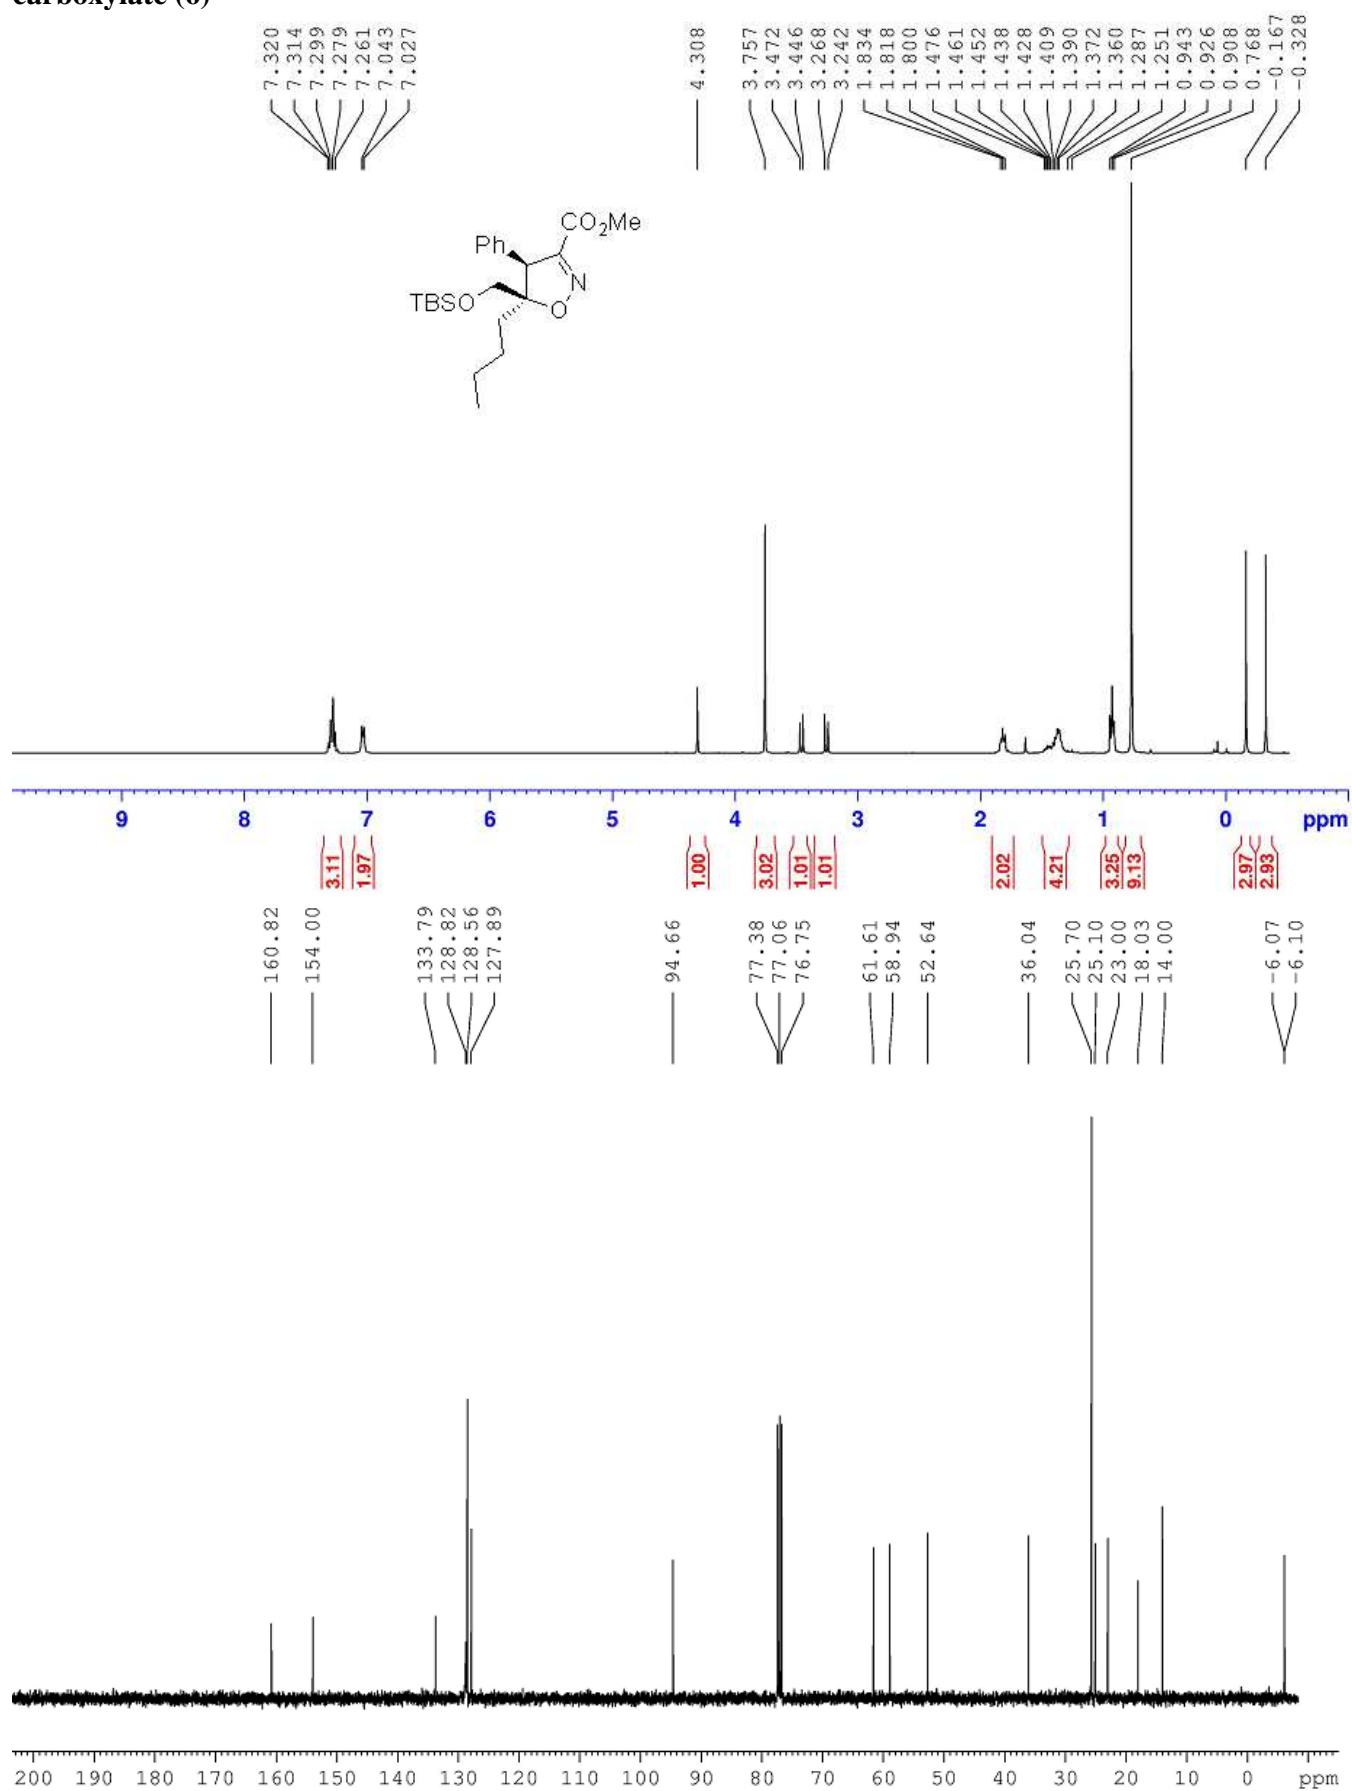



***tert*-Butyl (3*R*,4*S*,5*R*)-5-butyl-5-((*tert*-butyldimethylsilyloxy)methyl)-2-oxo-4-phenyltetrahydrofuran-3-ylcarbamate (7)**

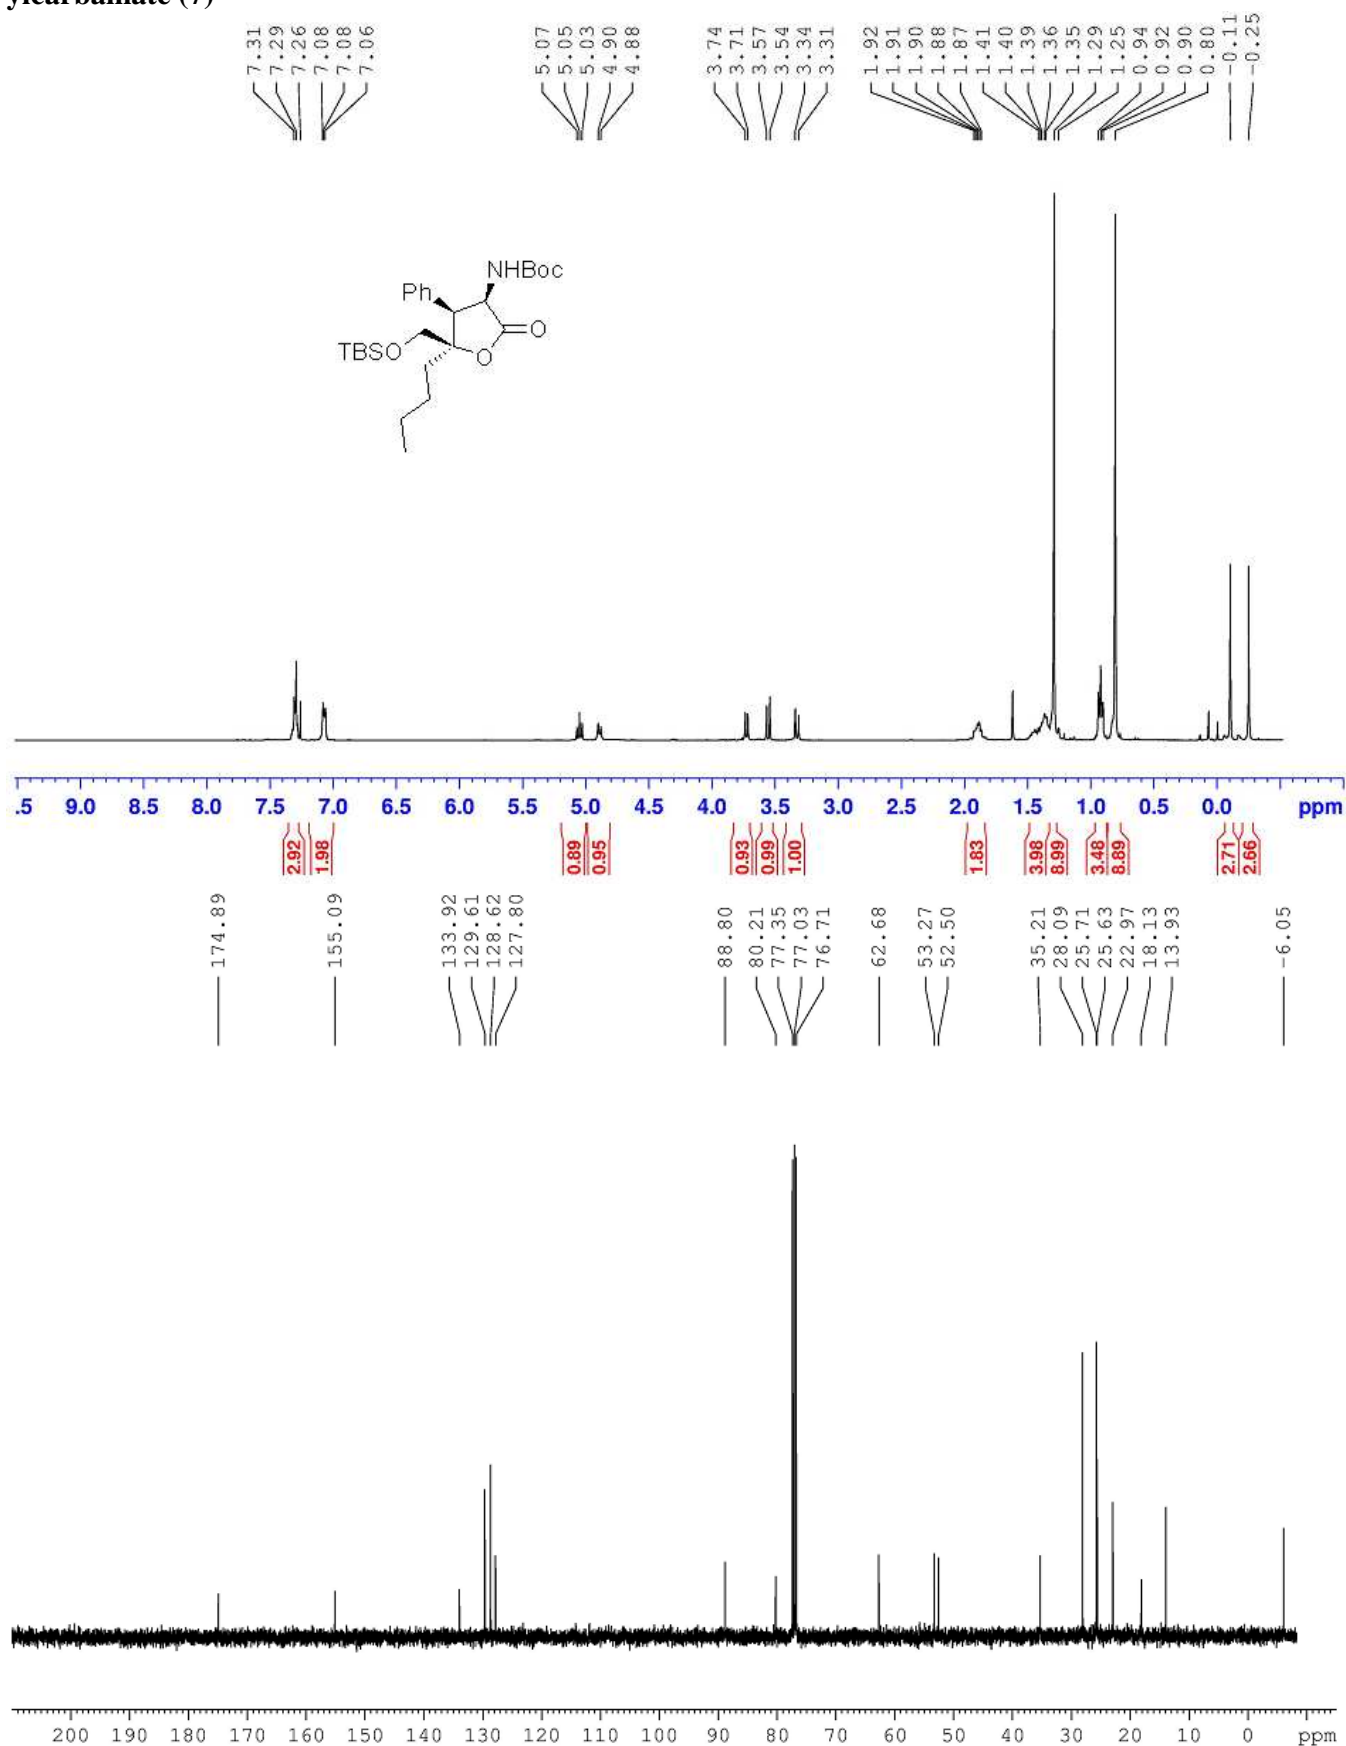

COSY spectrum of *tert*-butyl (3*R*,4*S*,5*R*)-5-butyl-5-((*tert*-butyldimethylsilyloxy)methyl)-2-oxo-4-phenyltetrahydrofuran-3-ylcarbamate (7)

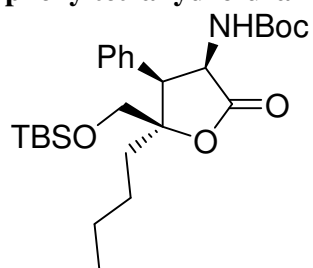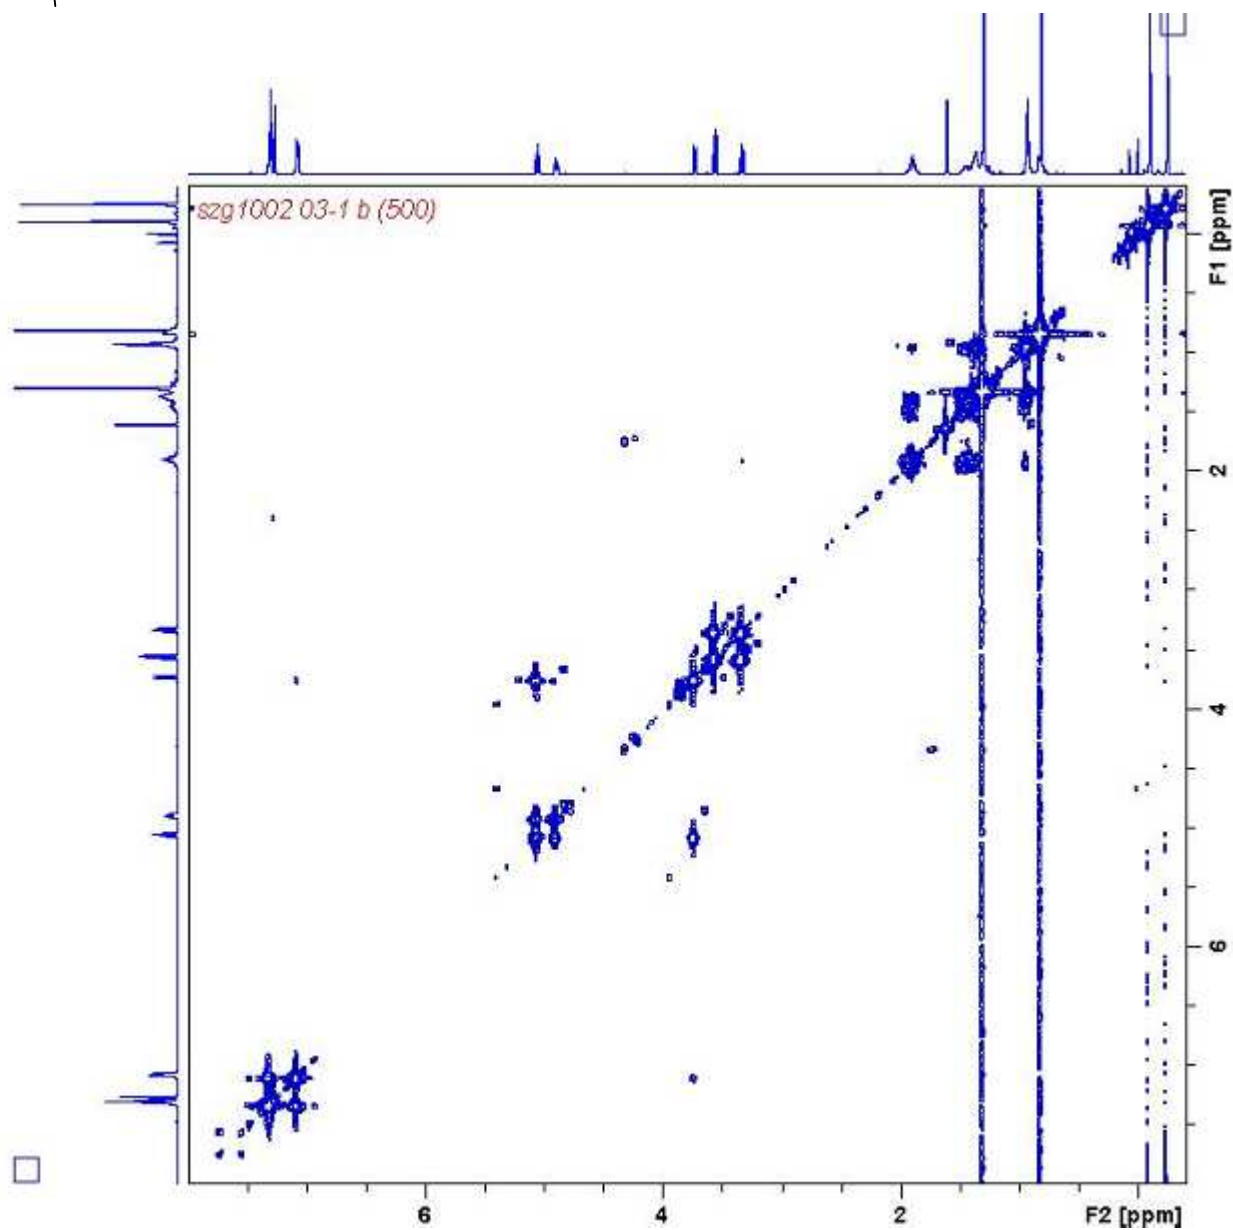

NOESY spectrum of *tert*-butyl (3*R*,4*S*,5*R*)-5-butyl-5-((*tert*-butyldimethylsilyloxy)methyl)-2-oxo-4-phenyltetrahydrofuran-3-ylcarbamate (7)

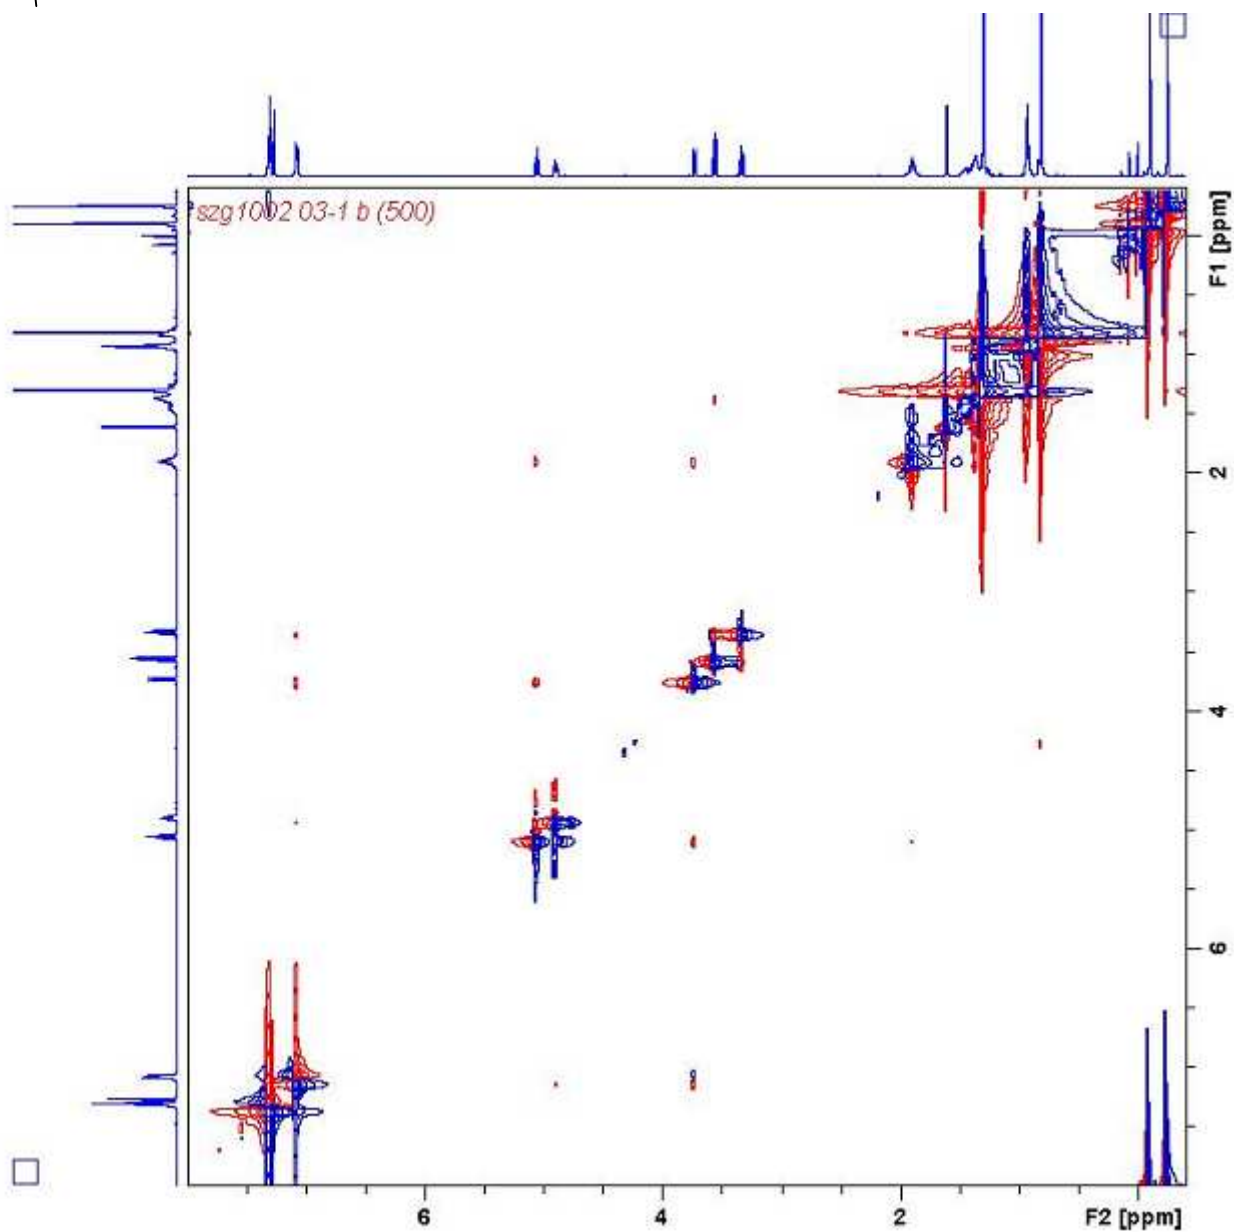

## VII. HPLC spectra

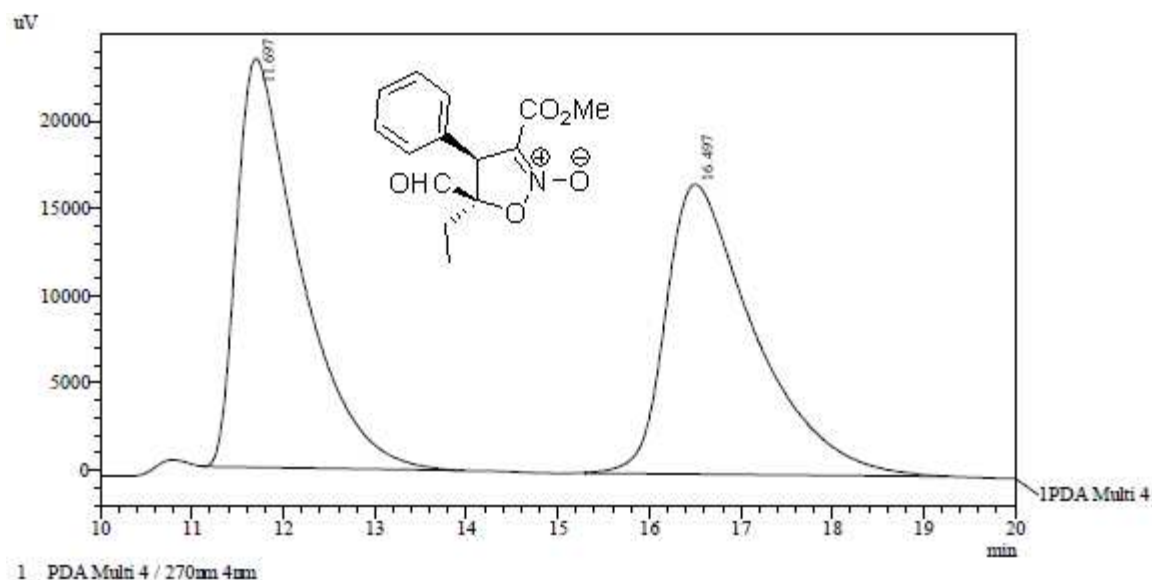

PeakTable

PDA Ch4 270nm 4nm

| Peak# | Ret. Time | Area    | Height | Area %  | Height % |
|-------|-----------|---------|--------|---------|----------|
| 1     | 11.697    | 1132804 | 23405  | 50.333  | 58.549   |
| 2     | 16.497    | 1117796 | 16570  | 49.667  | 41.451   |
| Total |           | 2250601 | 39976  | 100.000 | 100.000  |

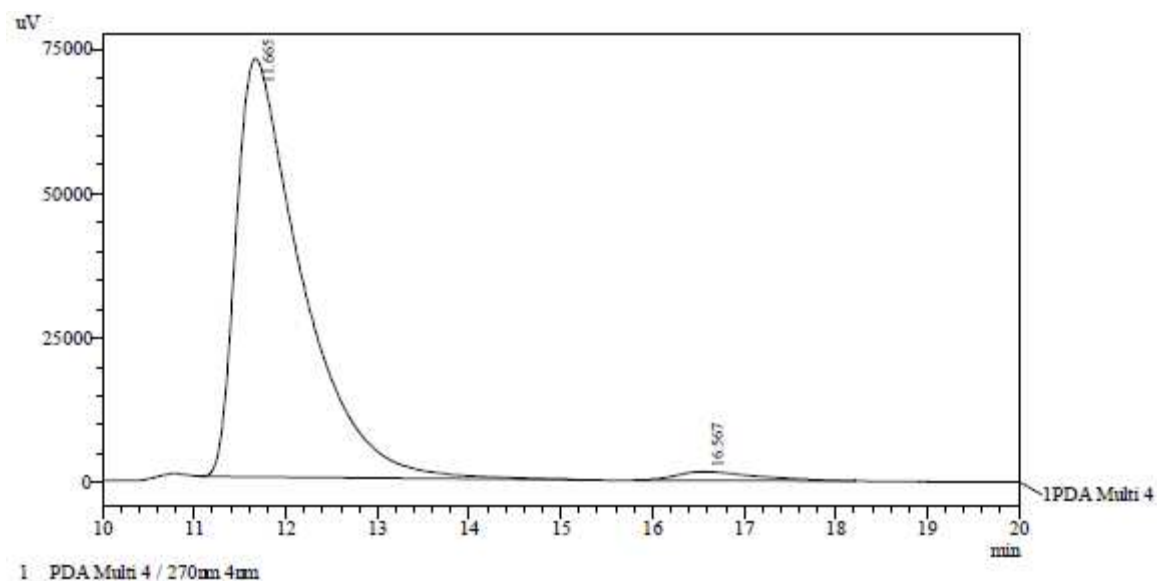

PeakTable

PDA Ch4 270nm 4nm

| Peak# | Ret. Time | Area    | Height | Area %  | Height % |
|-------|-----------|---------|--------|---------|----------|
| 1     | 11.665    | 3598736 | 72444  | 97.594  | 97.992   |
| 2     | 16.567    | 88715   | 1484   | 2.406   | 2.008    |
| Total |           | 3687451 | 73928  | 100.000 | 100.000  |

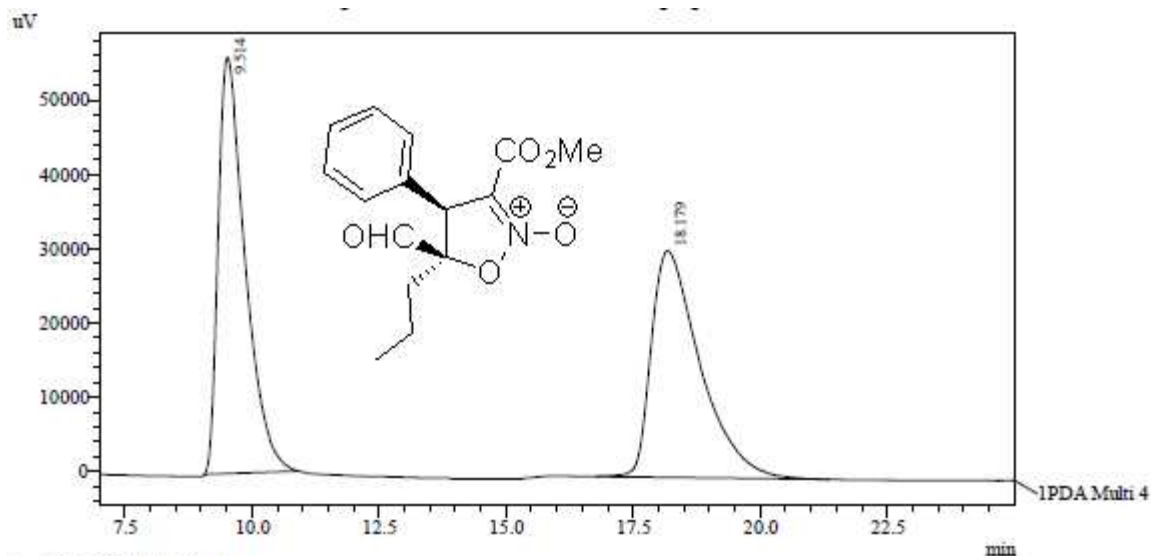

1 PDA Multi 4 / 270nm 4nm

PeakTable

PDA Ch4 270nm 4nm

| Peak# | Ret. Time | Area    | Height | Area %  | Height % |
|-------|-----------|---------|--------|---------|----------|
| 1     | 9.514     | 2070350 | 55984  | 50.379  | 64.762   |
| 2     | 18.179    | 2039169 | 30462  | 49.621  | 35.238   |
| Total |           | 4109519 | 86446  | 100.000 | 100.000  |

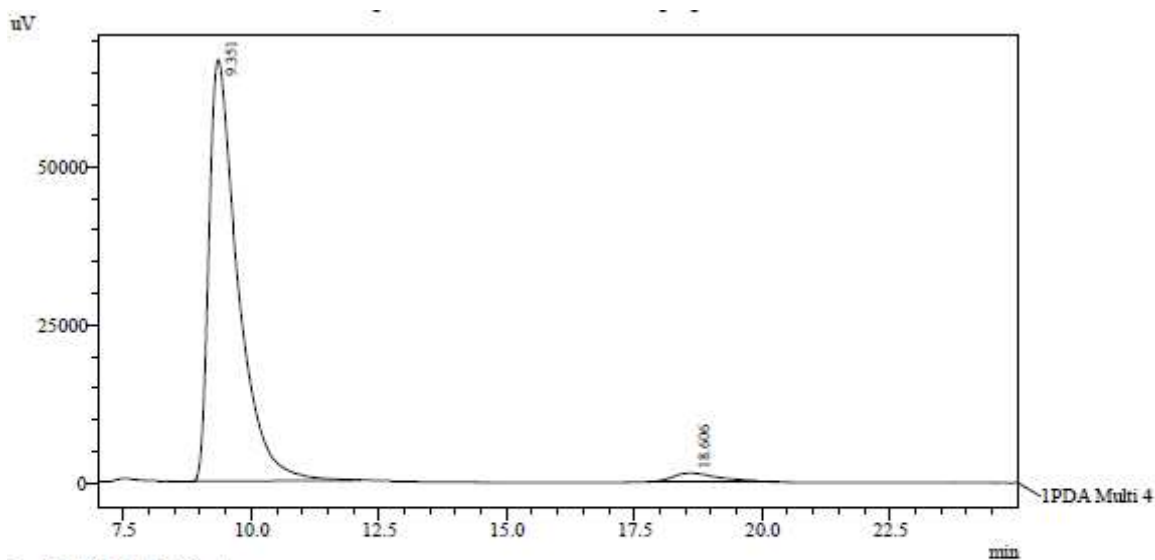

1 PDA Multi 4 / 270nm 4nm

PeakTable

PDA Ch4 270nm 4nm

| Peak# | Ret. Time | Area    | Height | Area %  | Height % |
|-------|-----------|---------|--------|---------|----------|
| 1     | 9.351     | 2614018 | 66726  | 96.809  | 97.968   |
| 2     | 18.606    | 86155   | 1384   | 3.191   | 2.032    |
| Total |           | 2700173 | 68110  | 100.000 | 100.000  |

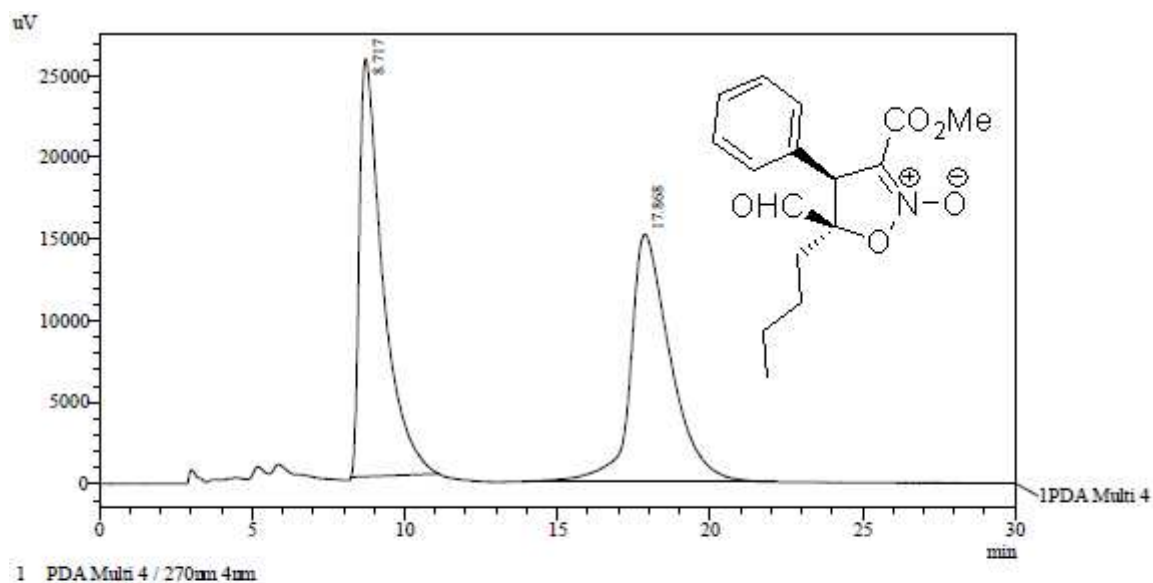

PeakTable

PDA Ch4 270nm 4nm

| Peak# | Ret. Time | Area    | Height | Area %  | Height % |
|-------|-----------|---------|--------|---------|----------|
| 1     | 8.717     | 1369137 | 25618  | 49.936  | 62.852   |
| 2     | 17.868    | 1372620 | 15141  | 50.064  | 37.148   |
| Total |           | 2741757 | 40759  | 100.000 | 100.000  |

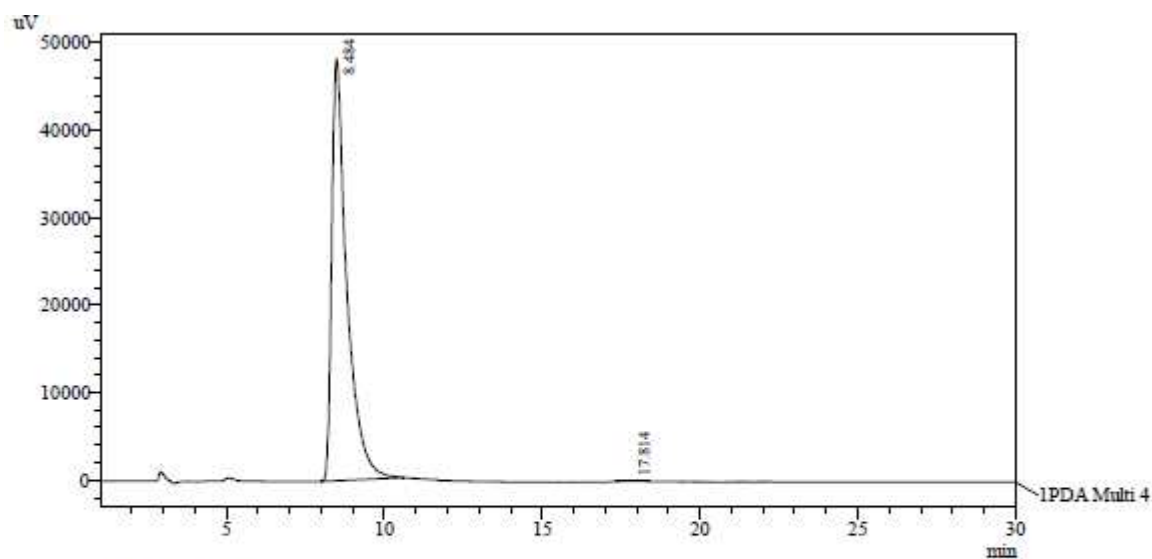

PeakTable

PDA Ch4 270nm 4nm

| Peak# | Ret. Time | Area    | Height | Area %  | Height % |
|-------|-----------|---------|--------|---------|----------|
| 1     | 8.484     | 1612094 | 48220  | 99.782  | 99.792   |
| 2     | 17.814    | 3520    | 100    | 0.218   | 0.208    |
| Total |           | 1615614 | 48321  | 100.000 | 100.000  |

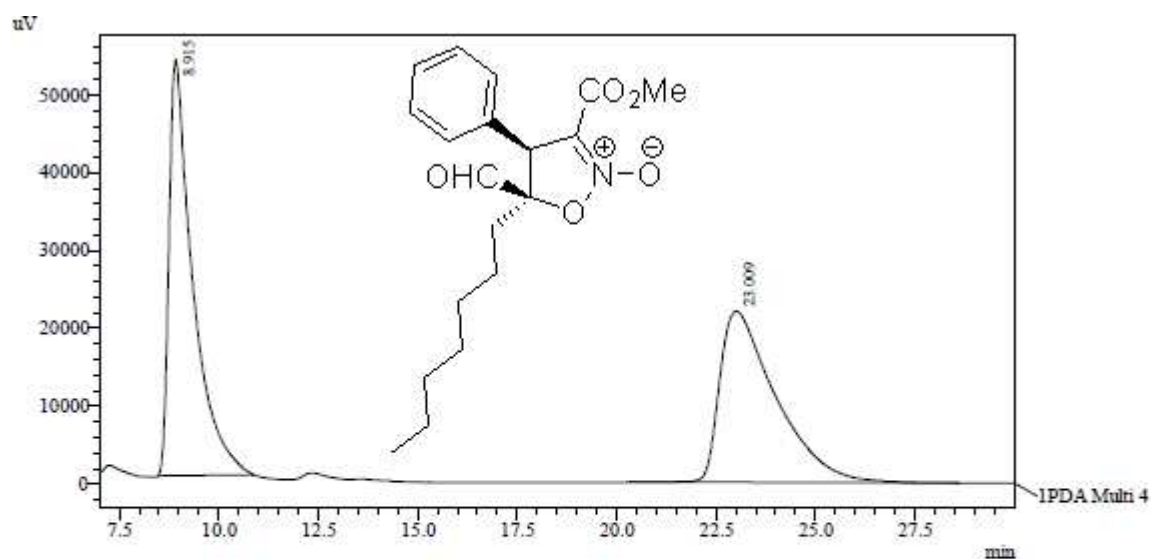

1 PDA Multi 4 / 270nm 4nm

PeakTable

PDA Ch4 270nm 4nm

| Peak# | Ret. Time | Area    | Height | Area %  | Height % |
|-------|-----------|---------|--------|---------|----------|
| 1     | 8.915     | 2212148 | 53382  | 50.627  | 70.851   |
| 2     | 23.009    | 2157322 | 21962  | 49.373  | 29.149   |
| Total |           | 4369470 | 75344  | 100.000 | 100.000  |

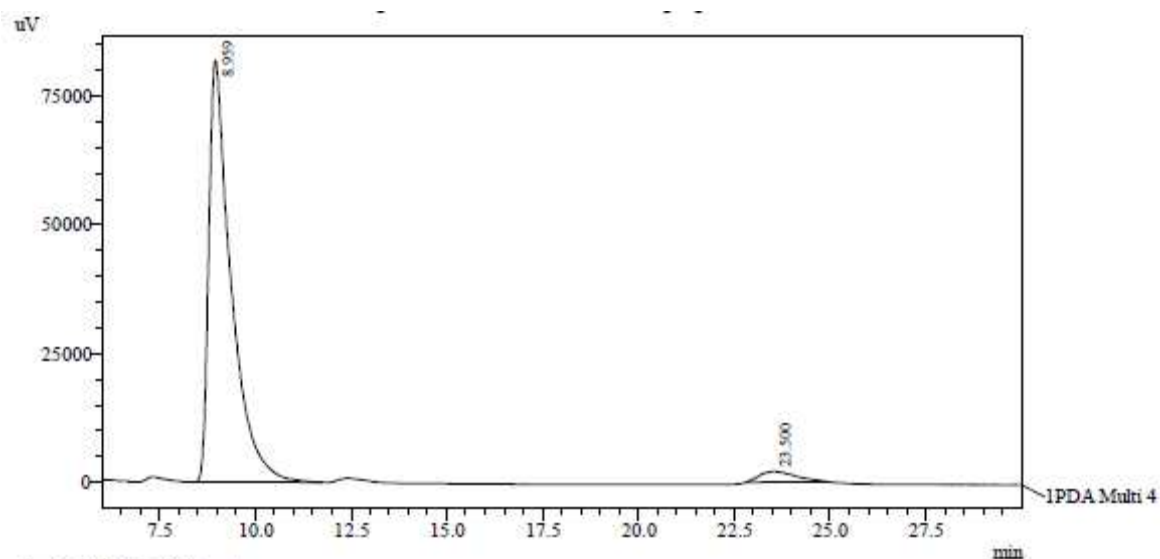

1 PDA Multi 4 / 270nm 4nm

PeakTable

PDA Ch4 270nm 4nm

| Peak# | Ret. Time | Area    | Height | Area %  | Height % |
|-------|-----------|---------|--------|---------|----------|
| 1     | 8.959     | 3315745 | 81852  | 96.121  | 97.566   |
| 2     | 23.500    | 133818  | 2042   | 3.879   | 2.434    |
| Total |           | 3449563 | 83894  | 100.000 | 100.000  |



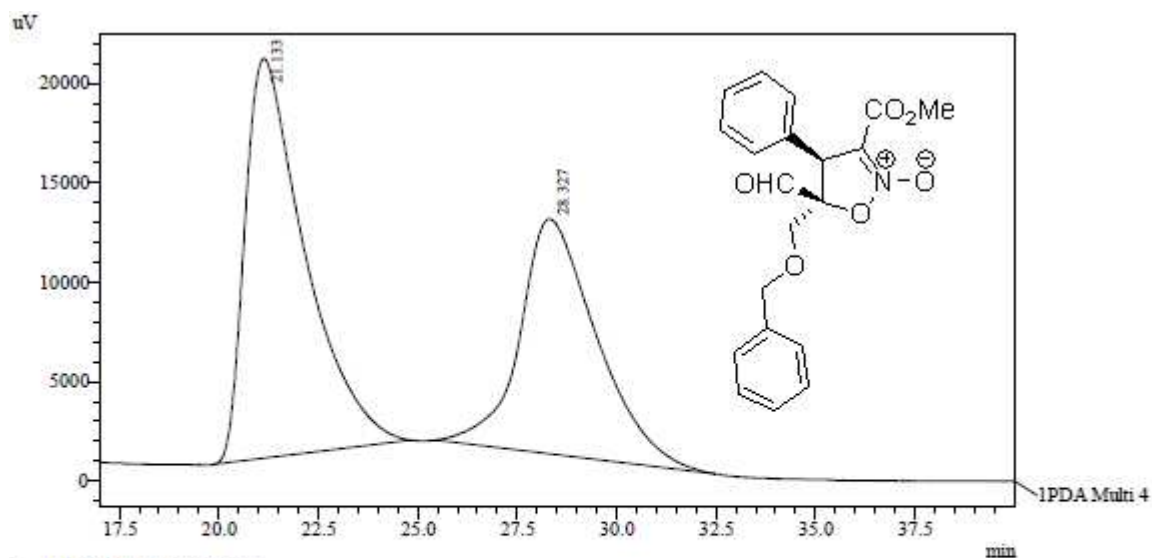

1 PDA Multi 4 / 270nm 4nm

PeakTable

PDA Ch4 270nm 4nm

| Peak# | Ret. Time | Area    | Height | Area %  | Height % |
|-------|-----------|---------|--------|---------|----------|
| 1     | 21.133    | 2114615 | 20098  | 56.996  | 62.985   |
| 2     | 28.327    | 1595495 | 11811  | 43.004  | 37.015   |
| Total |           | 3710110 | 31909  | 100.000 | 100.000  |

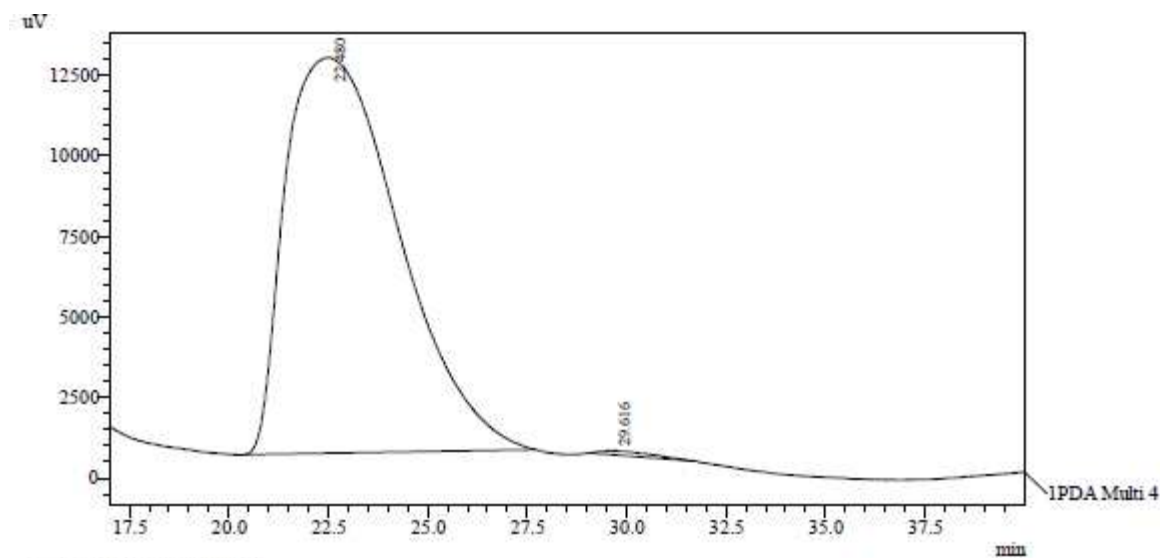

1 PDA Multi 4 / 270nm 4nm

PeakTable

PDA Ch4 270nm 4nm

| Peak# | Ret. Time | Area    | Height | Area %  | Height % |
|-------|-----------|---------|--------|---------|----------|
| 1     | 22.480    | 2441281 | 12282  | 99.470  | 98.940   |
| 2     | 29.616    | 13000   | 132    | 0.530   | 1.060    |
| Total |           | 2454281 | 12414  | 100.000 | 100.000  |



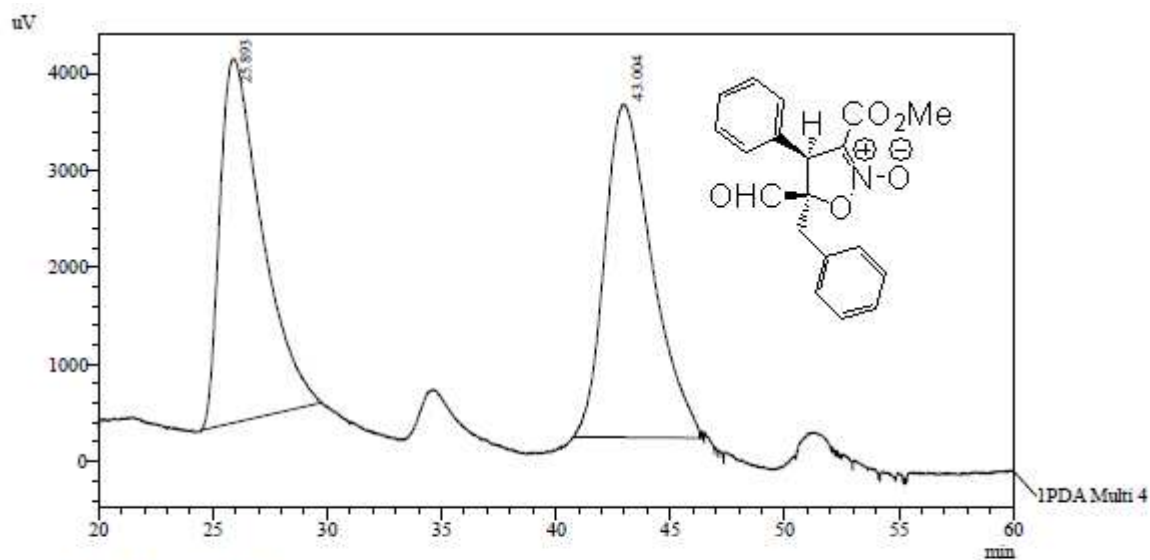

1 PDA Multi 4 / 270nm 4nm

PeakTable

PDA Ch4 270nm 4nm

| Peak# | Ret. Time | Area   | Height | Area %  | Height % |
|-------|-----------|--------|--------|---------|----------|
| 1     | 25.893    | 481221 | 3758   | 49.260  | 52.224   |
| 2     | 43.004    | 495683 | 3438   | 50.740  | 47.776   |
| Total |           | 976904 | 7196   | 100.000 | 100.000  |

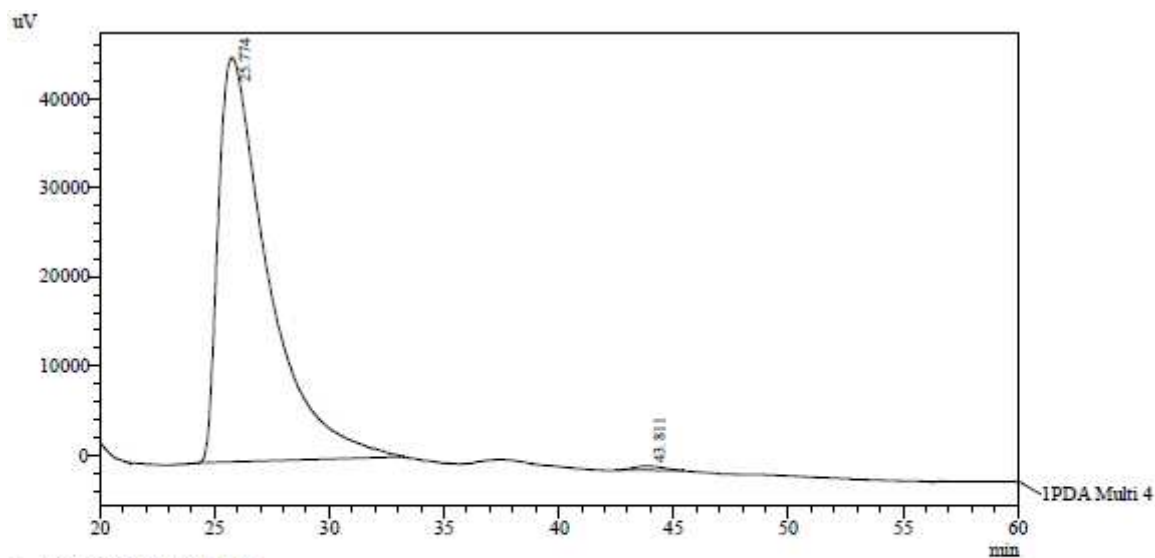

1 PDA Multi 4 / 270nm 4nm

PeakTable

PDA Ch4 270nm 4nm

| Peak# | Ret. Time | Area    | Height | Area %  | Height % |
|-------|-----------|---------|--------|---------|----------|
| 1     | 25.774    | 6820440 | 45330  | 99.363  | 98.974   |
| 2     | 43.811    | 43725   | 470    | 0.637   | 1.026    |
| Total |           | 6864165 | 45801  | 100.000 | 100.000  |

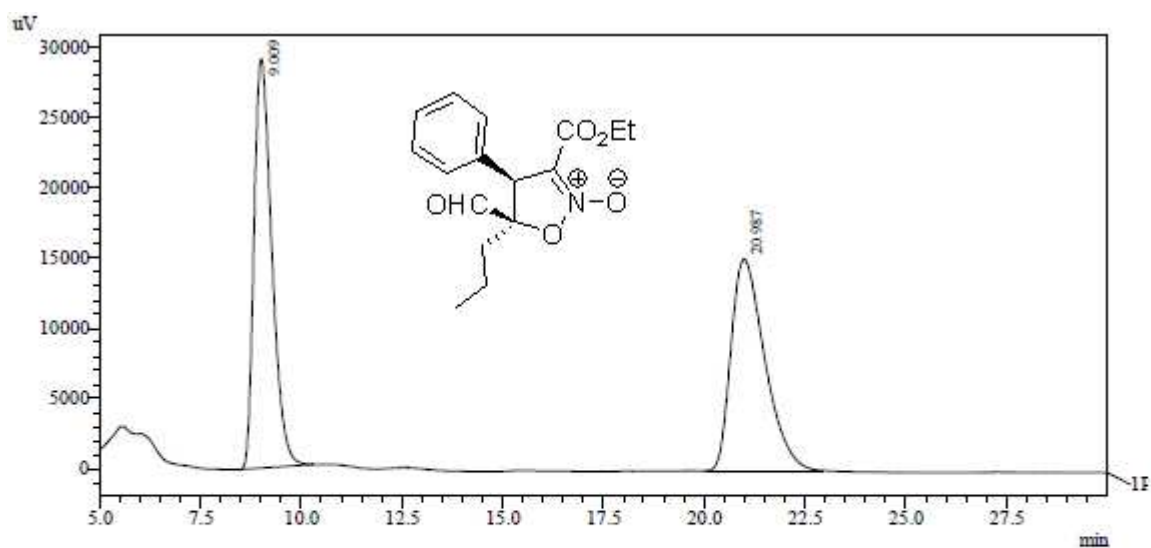

1 PDA Multi 4 / 270nm 4nm

PeakTable

PDA Ch4 270nm 4nm

| Peak# | Ret. Time | Area    | Height | Area %  | Height % |
|-------|-----------|---------|--------|---------|----------|
| 1     | 9.009     | 894207  | 29108  | 50.470  | 65.940   |
| 2     | 20.987    | 877555  | 15035  | 49.530  | 34.060   |
| Total |           | 1771762 | 44144  | 100.000 | 100.000  |

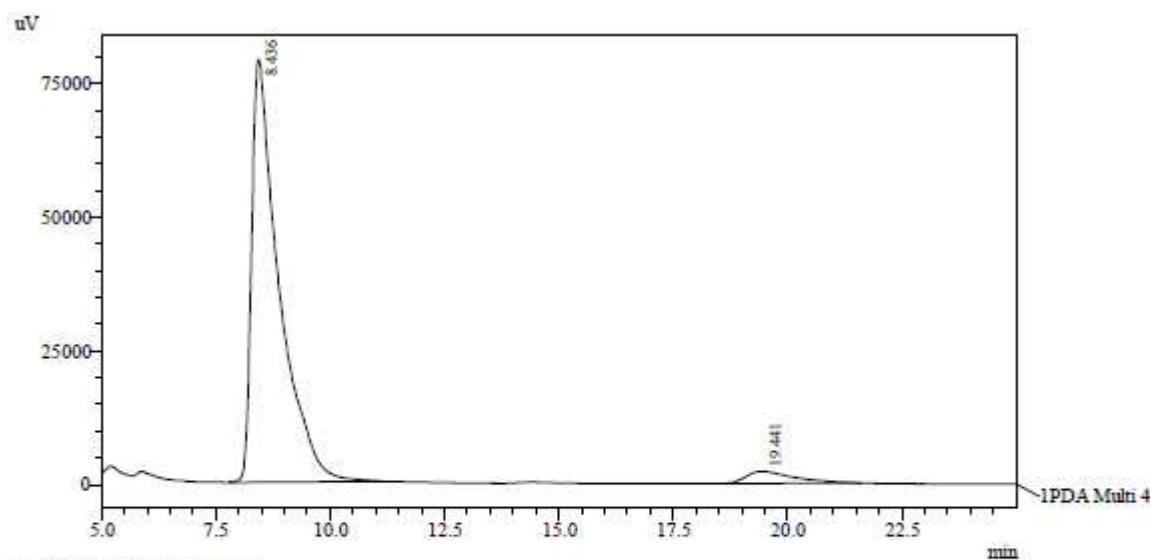

1 PDA Multi 4 / 270nm 4nm

PeakTable

PDA Ch4 270nm 4nm

| Peak# | Ret. Time | Area    | Height | Area %  | Height % |
|-------|-----------|---------|--------|---------|----------|
| 1     | 8.436     | 3278564 | 79043  | 95.326  | 97.232   |
| 2     | 19.441    | 160772  | 2250   | 4.674   | 2.768    |
| Total |           | 3439335 | 81293  | 100.000 | 100.000  |

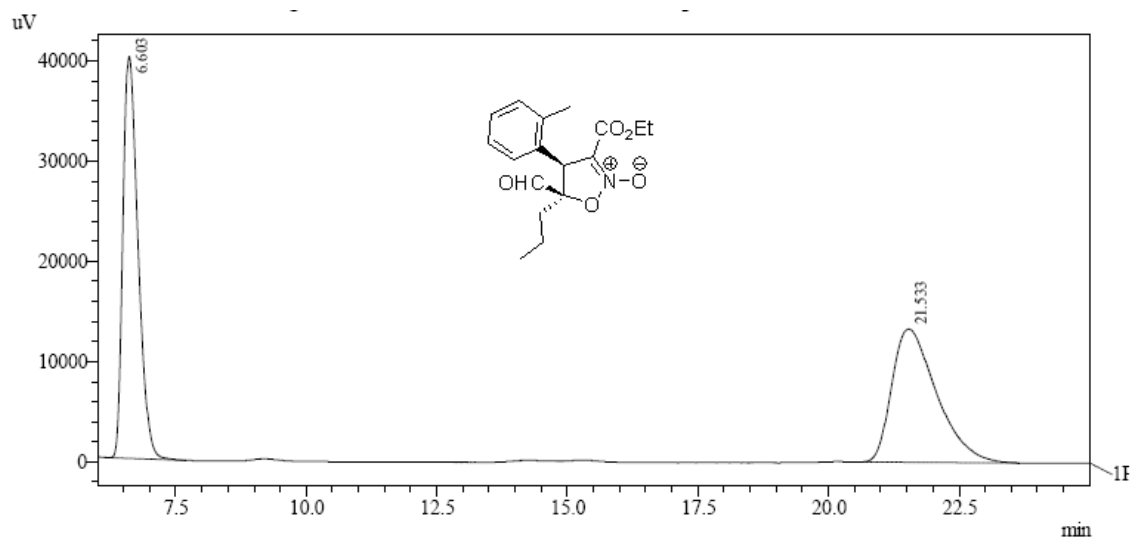

1 PDA Multi 4 / 270nm 4nm

PeakTable

PDA Ch4 270nm 4nm

| Peak# | Ret. Time | Area    | Height | Area %  | Height % |
|-------|-----------|---------|--------|---------|----------|
| 1     | 6.603     | 803461  | 40076  | 50.371  | 75.103   |
| 2     | 21.533    | 791617  | 13286  | 49.629  | 24.897   |
| Total |           | 1595078 | 53362  | 100.000 | 100.000  |

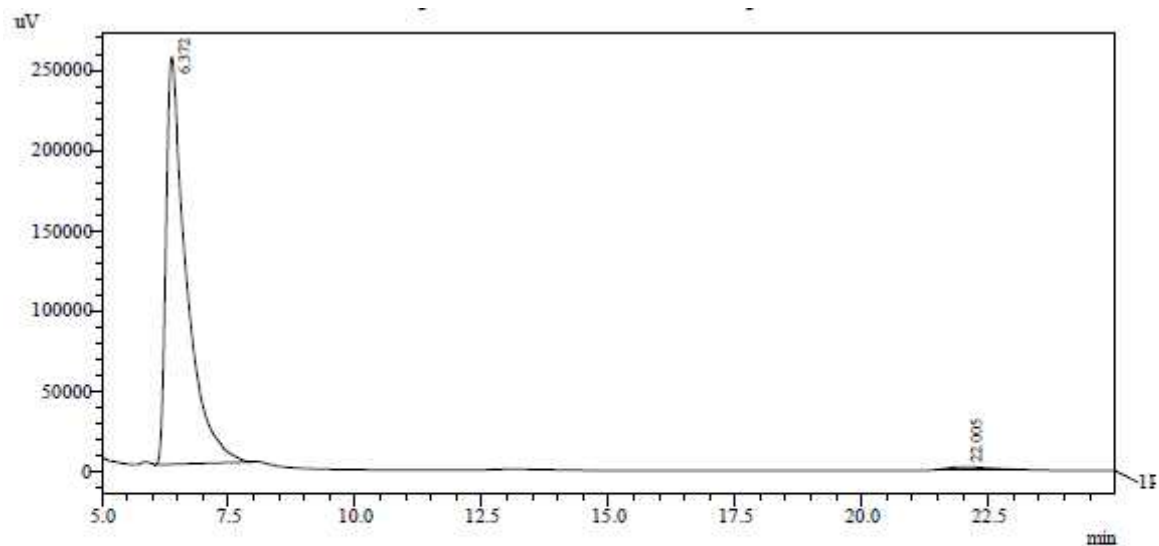

1 PDA Multi 4 / 270nm 4nm

PeakTable

PDA Ch4 270nm 4nm

| Peak# | Ret. Time | Area    | Height | Area %  | Height % |
|-------|-----------|---------|--------|---------|----------|
| 1     | 6.372     | 7072549 | 253935 | 98.708  | 99.286   |
| 2     | 22.005    | 92542   | 1825   | 1.292   | 0.714    |
| Total |           | 7165091 | 255761 | 100.000 | 100.000  |

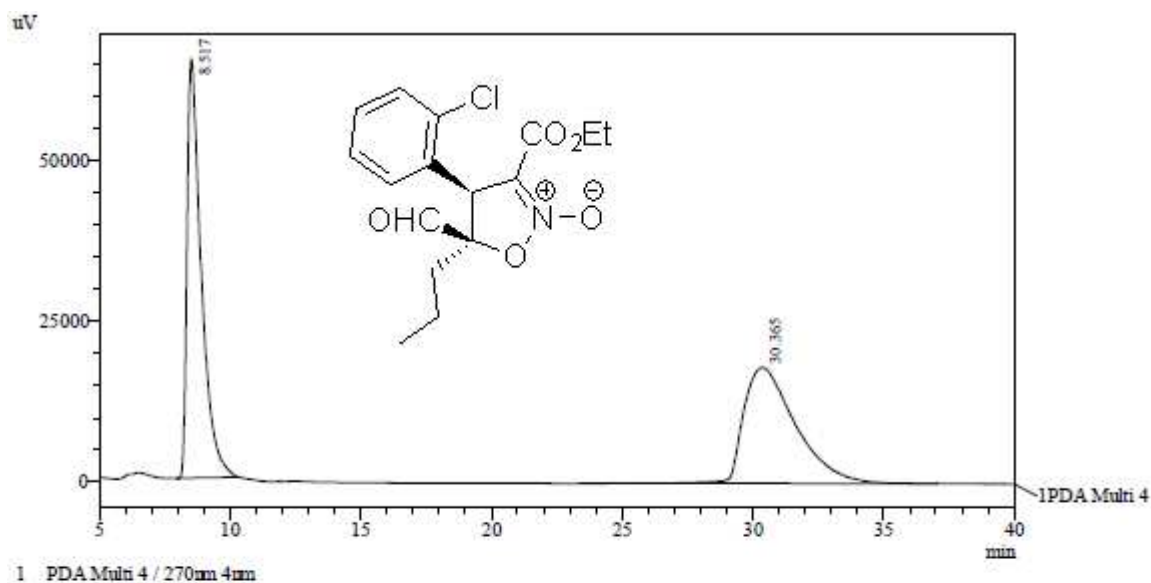

PeakTable

PDA Ch4 270nm 4nm

| Peak# | Ret. Time | Area    | Height | Area %  | Height % |
|-------|-----------|---------|--------|---------|----------|
| 1     | 8.517     | 2471393 | 65081  | 49.915  | 78.343   |
| 2     | 30.365    | 2479785 | 17991  | 50.085  | 21.657   |
| Total |           | 4951177 | 83072  | 100.000 | 100.000  |

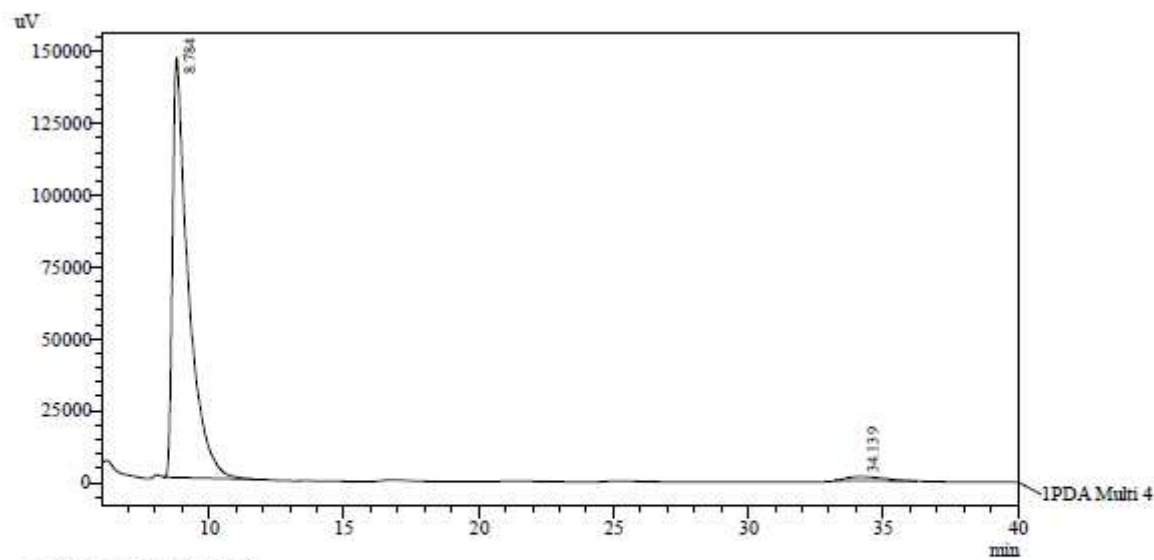

PeakTable

PDA Ch4 270nm 4nm

| Peak# | Ret. Time | Area    | Height | Area %  | Height % |
|-------|-----------|---------|--------|---------|----------|
| 1     | 8.784     | 5946027 | 146129 | 97.854  | 99.040   |
| 2     | 34.139    | 130384  | 1416   | 2.146   | 0.960    |
| Total |           | 6076412 | 147545 | 100.000 | 100.000  |

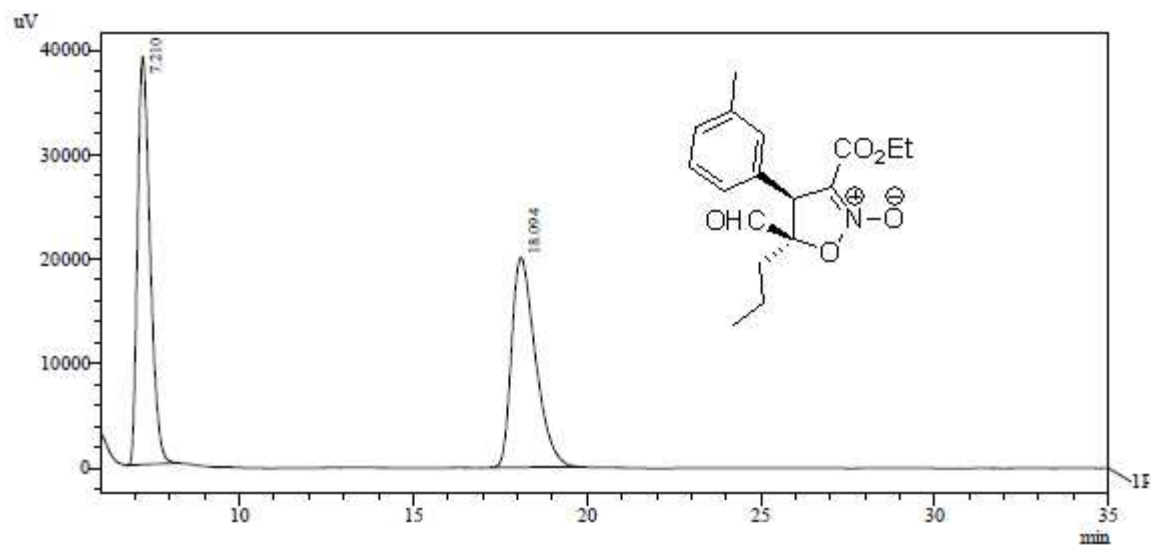

1 PDA Multi 4 / 270nm 4nm

PeakTable

PDA Ch4 270nm 4nm

| Peak# | Ret. Time | Area    | Height | Area %  | Height % |
|-------|-----------|---------|--------|---------|----------|
| 1     | 7.210     | 982058  | 39012  | 50.556  | 66.040   |
| 2     | 18.094    | 960459  | 20061  | 49.444  | 33.960   |
| Total |           | 1942517 | 59074  | 100.000 | 100.000  |

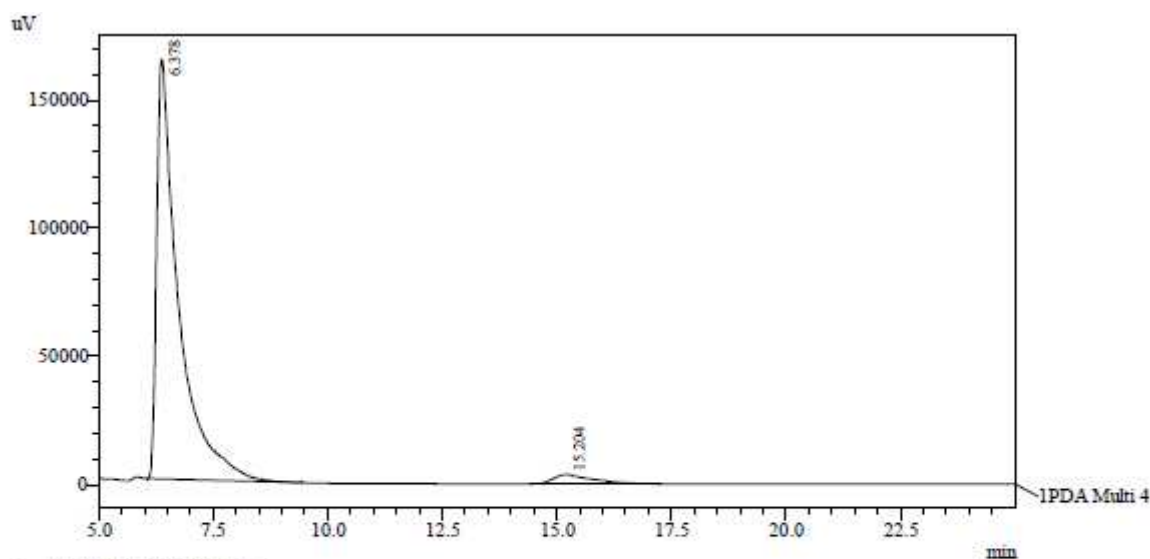

1 PDA Multi 4 / 270nm 4nm

PeakTable

PDA Ch4 270nm 4nm

| Peak# | Ret. Time | Area    | Height | Area %  | Height % |
|-------|-----------|---------|--------|---------|----------|
| 1     | 6.378     | 5429026 | 163733 | 96.211  | 97.880   |
| 2     | 15.204    | 213790  | 3546   | 3.789   | 2.120    |
| Total |           | 5642815 | 167278 | 100.000 | 100.000  |

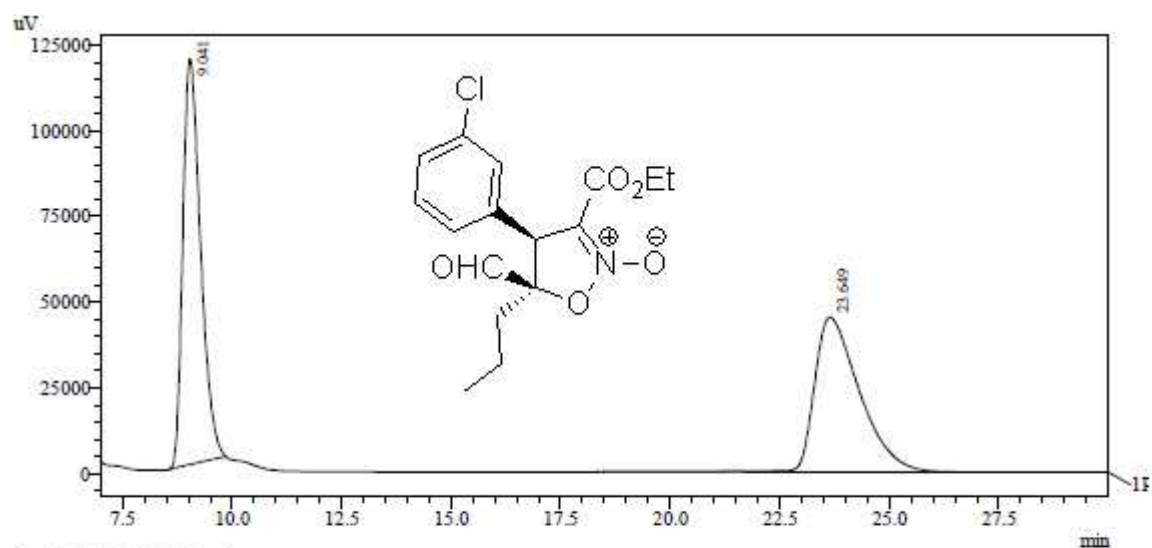

1 PDA Multi 1 / 220nm 4nm

PeakTable

PDA Ch1 220nm 4nm

| Peak# | Ret. Time | Area    | Height | Area %  | Height % |
|-------|-----------|---------|--------|---------|----------|
| 1     | 9.041     | 3329174 | 118389 | 50.695  | 72.399   |
| 2     | 23.649    | 3237944 | 45135  | 49.305  | 27.601   |
| Total |           | 6567118 | 163524 | 100.000 | 100.000  |

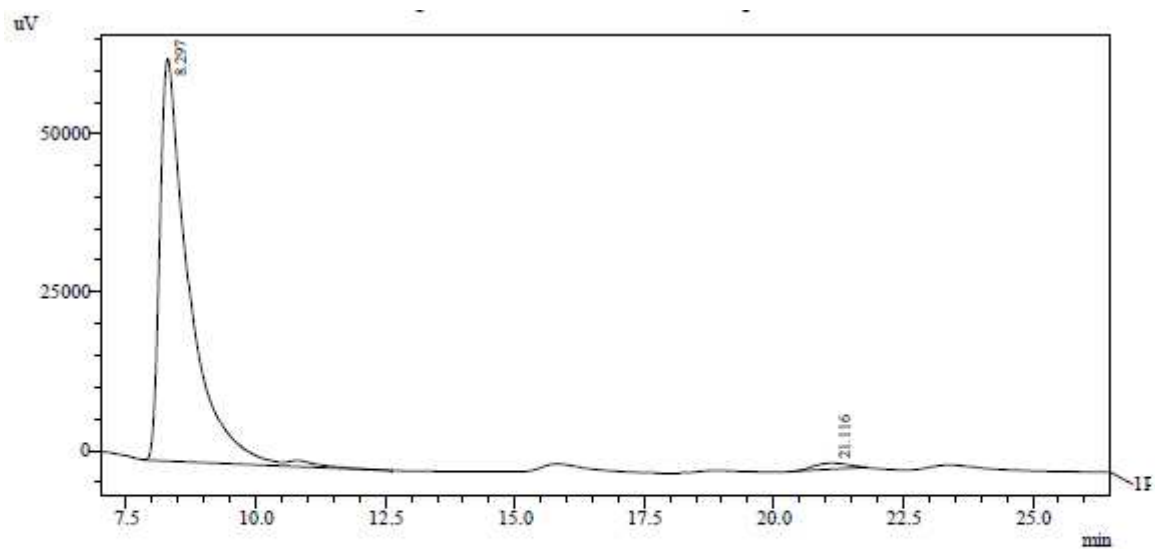

1 PDA Multi 1 / 220nm 4nm

PeakTable

PDA Ch1 220nm 4nm

| Peak# | Ret. Time | Area    | Height | Area %  | Height % |
|-------|-----------|---------|--------|---------|----------|
| 1     | 8.297     | 2458368 | 63404  | 98.222  | 98.472   |
| 2     | 21.116    | 44510   | 984    | 1.778   | 1.528    |
| Total |           | 2502879 | 64388  | 100.000 | 100.000  |

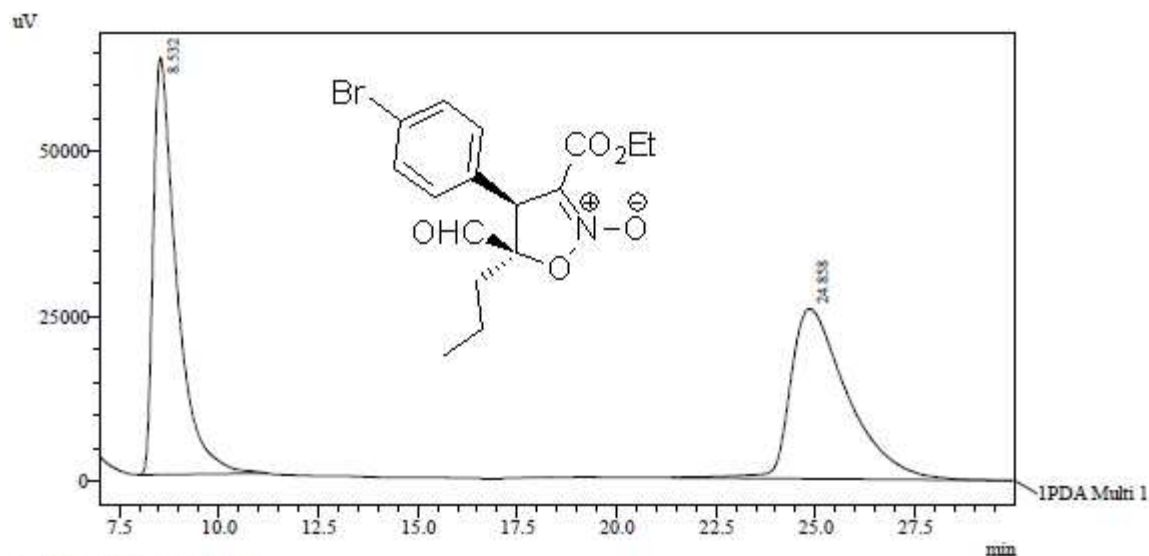

1 PDA Multi 1 / 220nm 4nm

PeakTable

PDA Ch1 220nm 4nm

| Peak# | Ret. Time | Area    | Height | Area %  | Height % |
|-------|-----------|---------|--------|---------|----------|
| 1     | 8.532     | 2575341 | 63133  | 50.085  | 71.012   |
| 2     | 24.858    | 2566621 | 25772  | 49.915  | 28.988   |
| Total |           | 5141962 | 88905  | 100.000 | 100.000  |

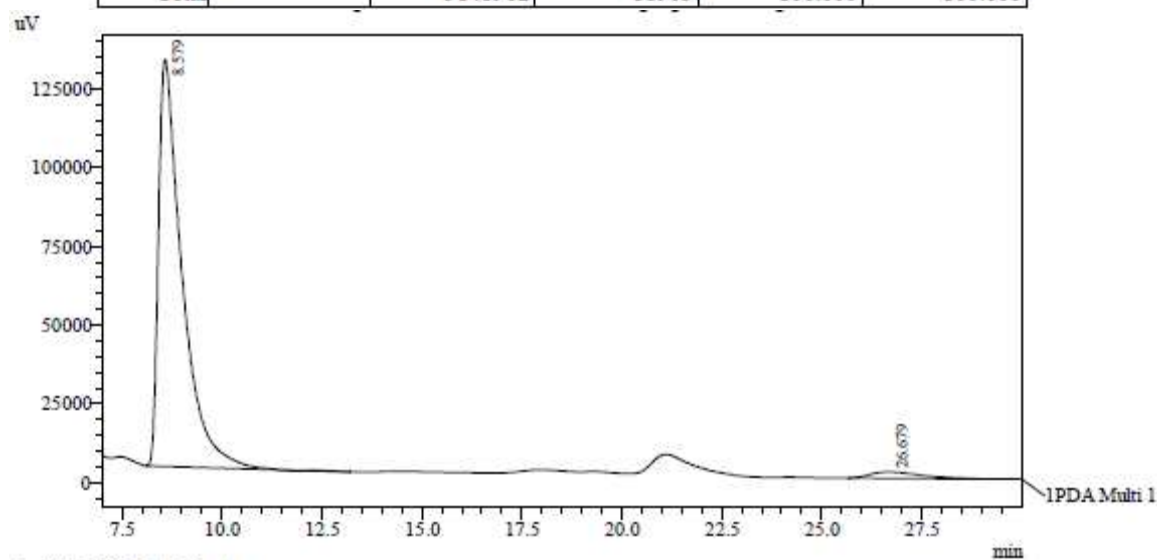

1 PDA Multi 1 / 220nm 4nm

PeakTable

PDA Ch1 220nm 4nm

| Peak# | Ret. Time | Area    | Height | Area %  | Height % |
|-------|-----------|---------|--------|---------|----------|
| 1     | 8.579     | 5289427 | 129161 | 96.755  | 98.466   |
| 2     | 26.679    | 177399  | 2012   | 3.245   | 1.534    |
| Total |           | 5466826 | 131173 | 100.000 | 100.000  |



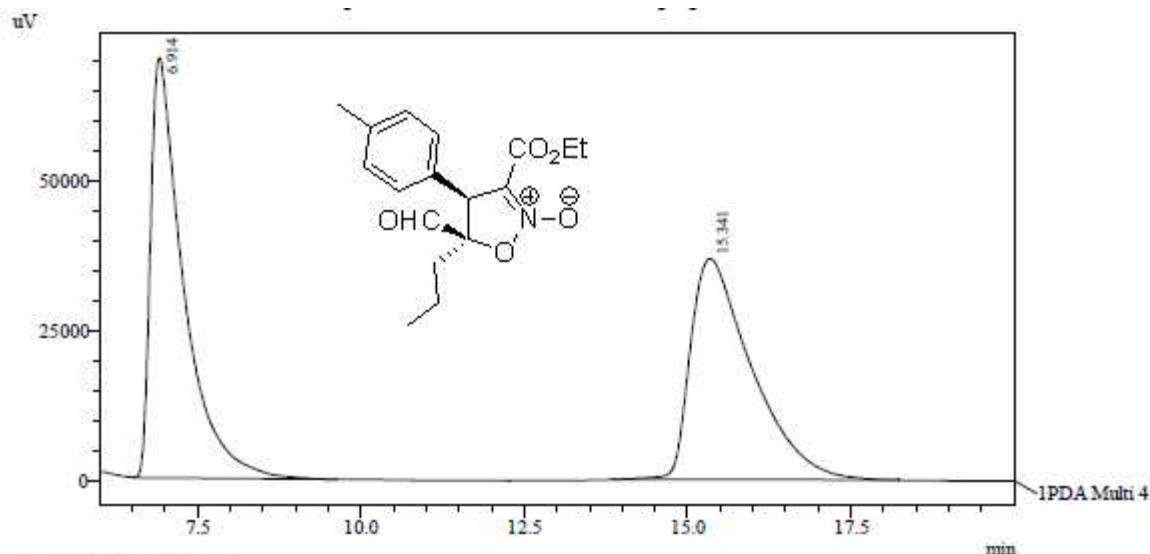

1 PDA Multi 4 / 270nm 4nm

PeakTable

PDA Ch4 270nm 4nm

| Peak# | Ret. Time | Area    | Height | Area %  | Height % |
|-------|-----------|---------|--------|---------|----------|
| 1     | 6.914     | 2446377 | 69787  | 50.450  | 65.522   |
| 2     | 15.341    | 2402698 | 36722  | 49.550  | 34.478   |
| Total |           | 4849076 | 106509 | 100.000 | 100.000  |

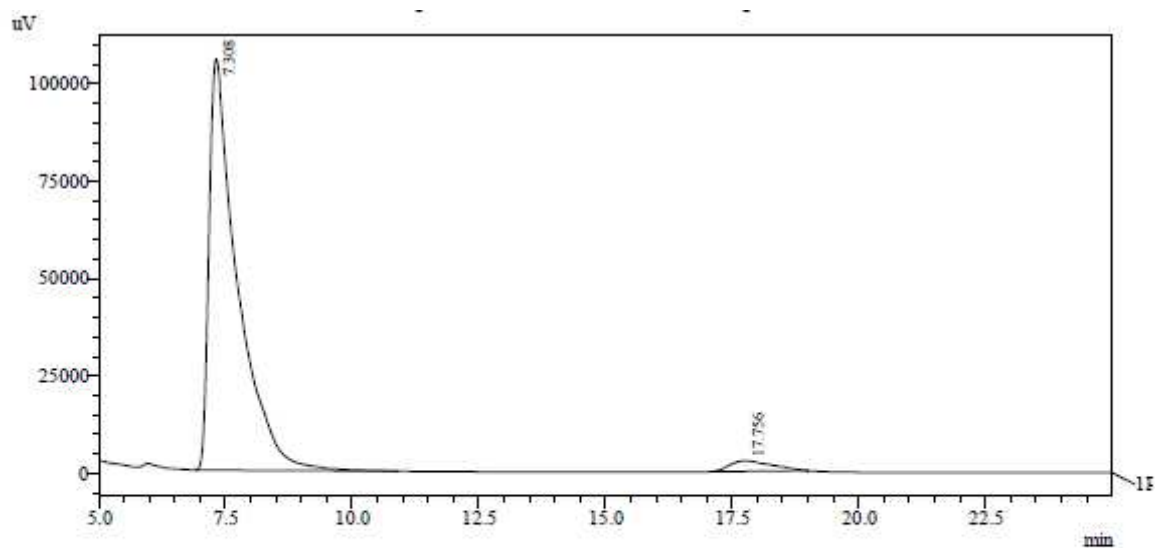

1 PDA Multi 4 / 270nm 4nm

PeakTable

PDA Ch4 270nm 4nm

| Peak# | Ret. Time | Area    | Height | Area %  | Height % |
|-------|-----------|---------|--------|---------|----------|
| 1     | 7.308     | 4113747 | 105702 | 96.326  | 97.516   |
| 2     | 17.756    | 156898  | 2693   | 3.674   | 2.484    |
| Total |           | 4270645 | 108395 | 100.000 | 100.000  |



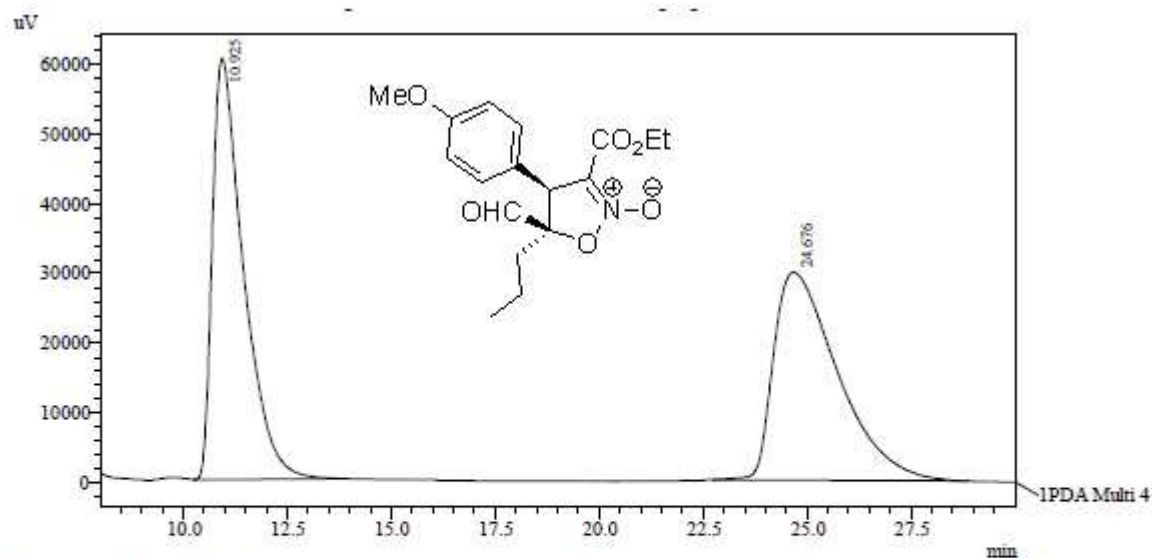

1 PDA Multi 4 / 270nm 4nm

PeakTable

PDA Ch4 270nm 4nm

| Peak# | Ret. Time | Area    | Height | Area %  | Height % |
|-------|-----------|---------|--------|---------|----------|
| 1     | 10.925    | 3132057 | 60205  | 49.536  | 66.932   |
| 2     | 24.676    | 3190774 | 29745  | 50.464  | 33.068   |
| Total |           | 6322831 | 89951  | 100.000 | 100.000  |

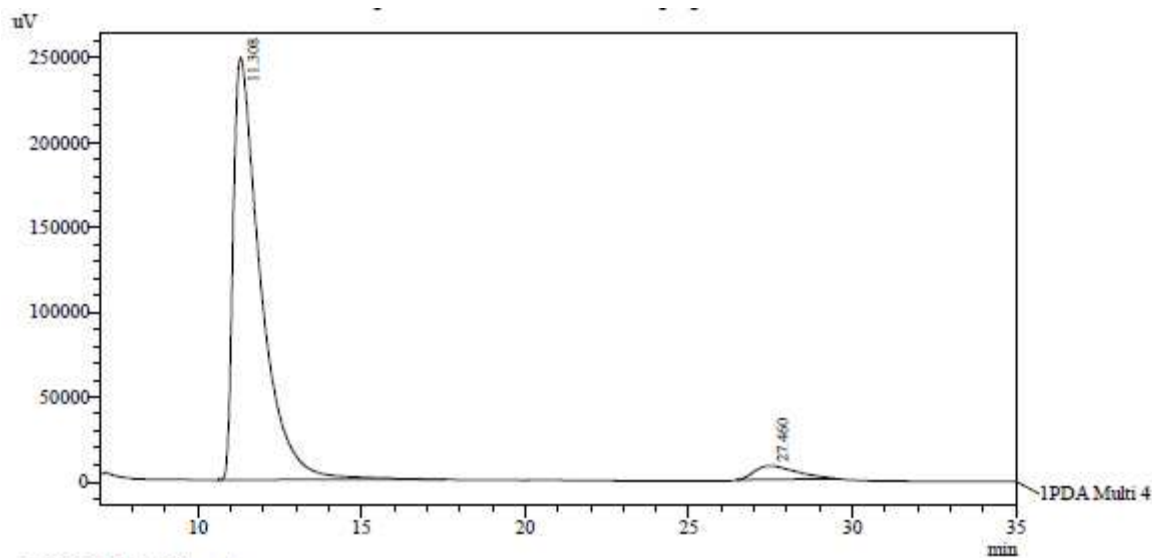

1 PDA Multi 4 / 270nm 4nm

PeakTable

PDA Ch4 270nm 4nm

| Peak# | Ret. Time | Area     | Height | Area %  | Height % |
|-------|-----------|----------|--------|---------|----------|
| 1     | 11.308    | 14485550 | 248884 | 95.361  | 96.884   |
| 2     | 27.460    | 704617   | 8004   | 4.639   | 3.116    |
| Total |           | 15190167 | 256888 | 100.000 | 100.000  |

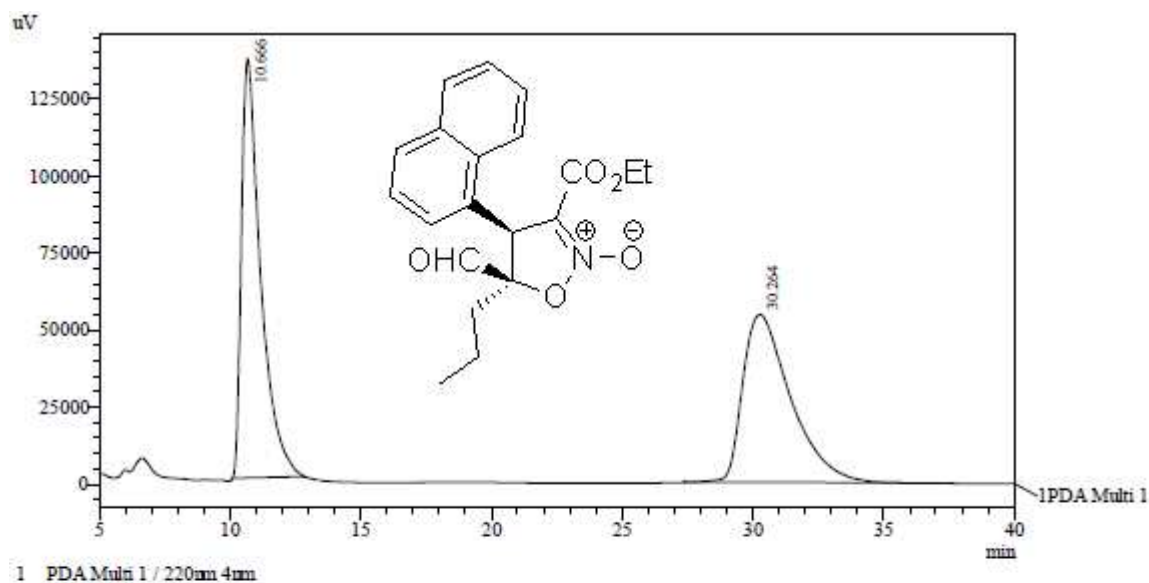

PeakTable

PDA Ch1 220nm 4nm

| Peak# | Ret. Time | Area     | Height | Area %  | Height % |
|-------|-----------|----------|--------|---------|----------|
| 1     | 10.666    | 6944427  | 136031 | 49.868  | 71.384   |
| 2     | 30.264    | 6981322  | 54531  | 50.132  | 28.616   |
| Total |           | 13925749 | 190562 | 100.000 | 100.000  |

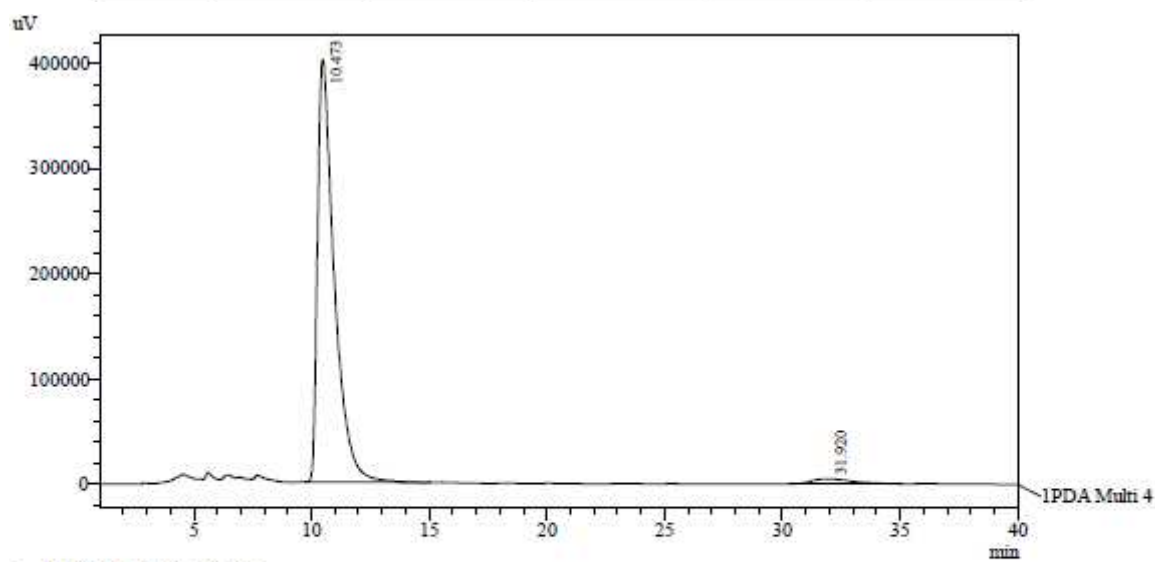

PeakTable

PDA Ch4 270nm 4nm

| Peak# | Ret. Time | Area     | Height | Area %  | Height % |
|-------|-----------|----------|--------|---------|----------|
| 1     | 10.473    | 19916113 | 401637 | 97.151  | 98.807   |
| 2     | 31.920    | 584043   | 4847   | 2.849   | 1.193    |
| Total |           | 20500156 | 406484 | 100.000 | 100.000  |

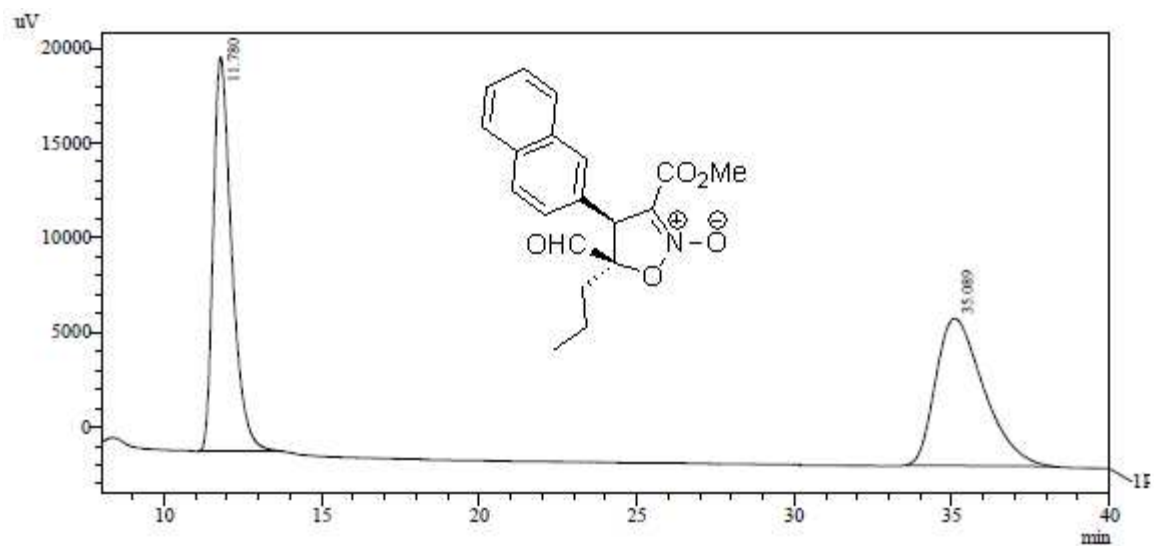

1 PDA Multi 4 / 270nm 4nm

PeakTable

PDA Ch4 270nm 4nm

| Peak# | Ret. Time | Area    | Height | Area %  | Height % |
|-------|-----------|---------|--------|---------|----------|
| 1     | 11.780    | 851525  | 20845  | 50.819  | 72.837   |
| 2     | 35.089    | 824070  | 7774   | 49.181  | 27.163   |
| Total |           | 1675595 | 28619  | 100.000 | 100.000  |

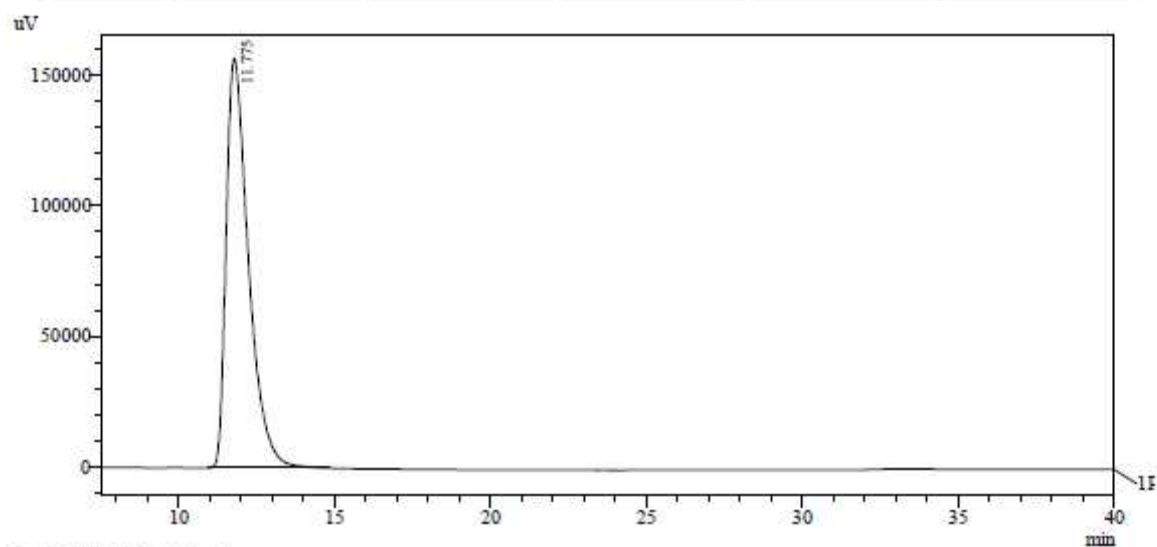

1 PDA Multi 1 / 220nm 4nm

PeakTable

PDA Ch1 220nm 4nm

| Peak# | Ret. Time | Area    | Height | Area %  | Height % |
|-------|-----------|---------|--------|---------|----------|
| 1     | 11.775    | 7793408 | 156328 | 100.000 | 100.000  |
| Total |           | 7793408 | 156328 | 100.000 | 100.000  |

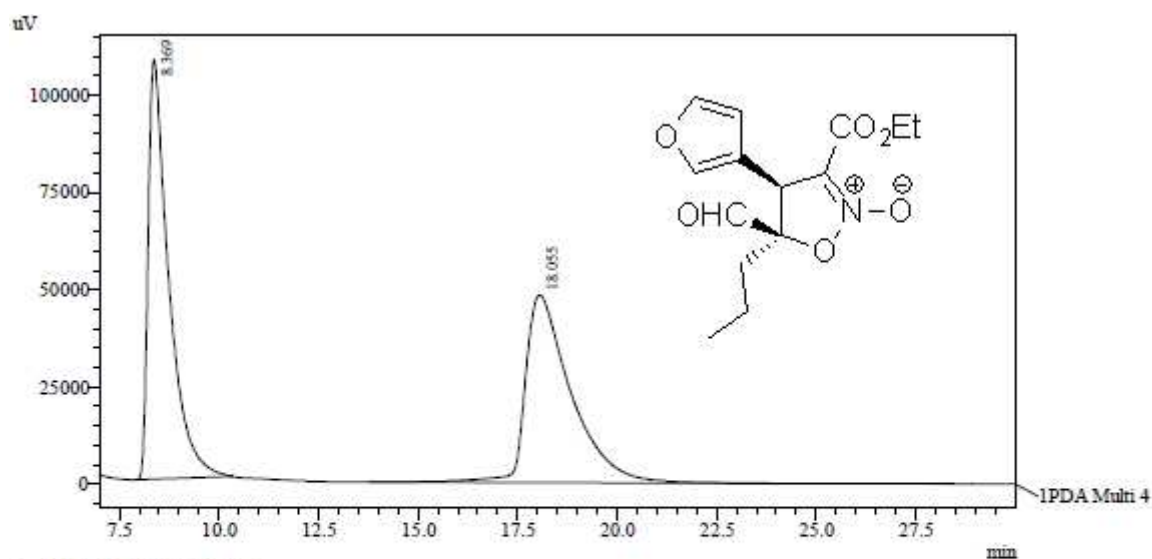

1 PDA Multi 4 / 270nm 4nm

PeakTable

PDA Ch4 270nm 4nm

| Peak# | Ret. Time | Area    | Height | Area %  | Height % |
|-------|-----------|---------|--------|---------|----------|
| 1     | 8.369     | 3878591 | 107790 | 50.231  | 69.120   |
| 2     | 18.055    | 3842860 | 48156  | 49.769  | 30.880   |
| Total |           | 7721451 | 155946 | 100.000 | 100.000  |

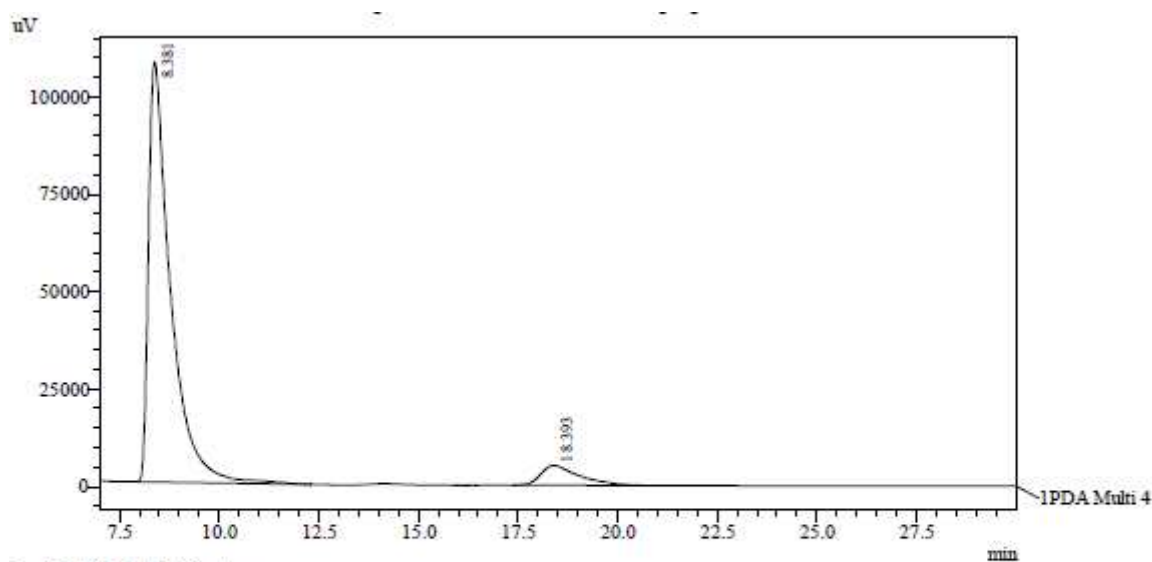

1 PDA Multi 4 / 270nm 4nm

PeakTable

PDA Ch4 270nm 4nm

| Peak# | Ret. Time | Area    | Height | Area %  | Height % |
|-------|-----------|---------|--------|---------|----------|
| 1     | 8.381     | 4136044 | 107864 | 92.533  | 95.573   |
| 2     | 18.393    | 333747  | 4997   | 7.467   | 4.427    |
| Total |           | 4469791 | 112860 | 100.000 | 100.000  |

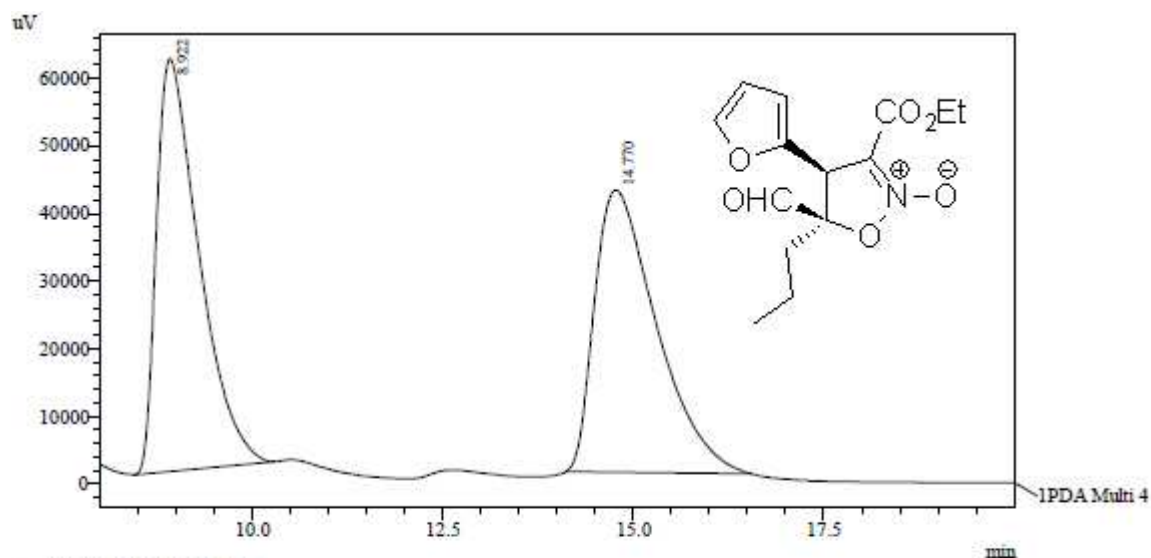

1 PDA Multi 4 / 270nm 4nm

PeakTable

PDA Ch4 270nm 4nm

| Peak# | Ret. Time | Area    | Height | Area %  | Height % |
|-------|-----------|---------|--------|---------|----------|
| 1     | 8.922     | 2368896 | 61022  | 50.056  | 59.395   |
| 2     | 14.770    | 2363586 | 41717  | 49.944  | 40.605   |
| Total |           | 4732482 | 102739 | 100.000 | 100.000  |

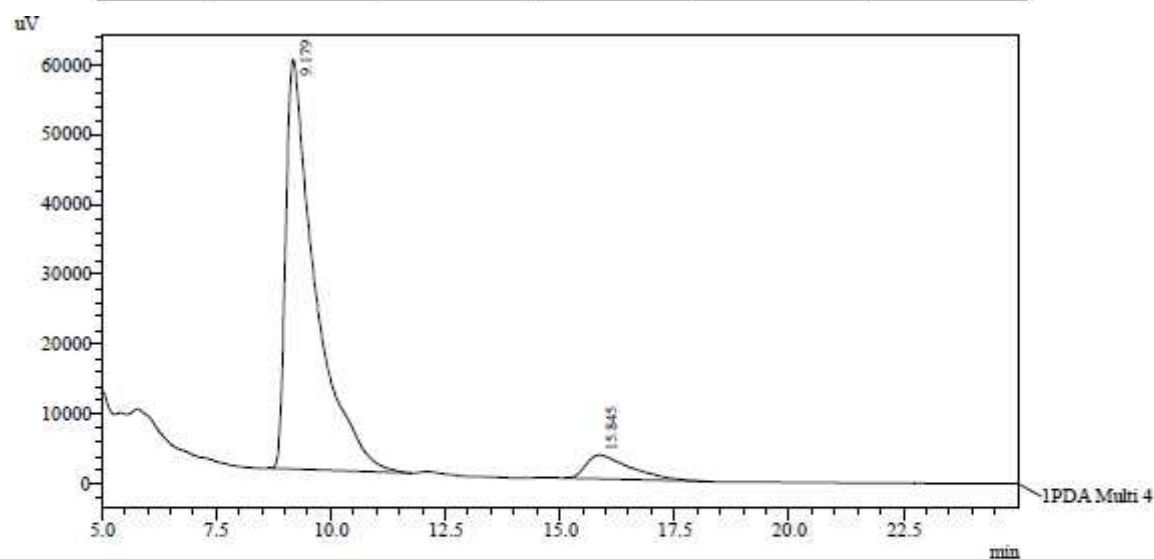

1 PDA Multi 4 / 270nm 4nm

PeakTable

PDA Ch4 270nm 4nm

| Peak# | Ret. Time | Area    | Height | Area %  | Height % |
|-------|-----------|---------|--------|---------|----------|
| 1     | 9.179     | 2616504 | 58486  | 92.011  | 94.538   |
| 2     | 15.845    | 227185  | 3379   | 7.989   | 5.462    |
| Total |           | 2843690 | 61865  | 100.000 | 100.000  |

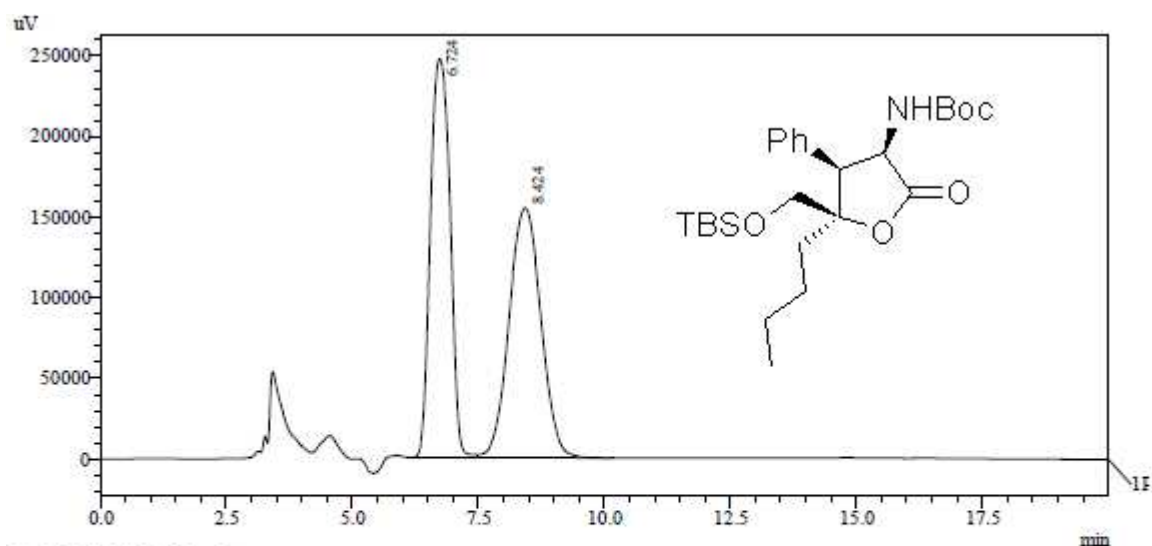

1 PDA Multi 1 / 210nm 4nm

PeakTable

PDA Ch1 210nm 4nm

| Peak# | Ret. Time | Area     | Height | Area %  | Height % |
|-------|-----------|----------|--------|---------|----------|
| 1     | 6.724     | 6725223  | 247303 | 49.598  | 61.457   |
| 2     | 8.424     | 6834115  | 155099 | 50.402  | 38.543   |
| Total |           | 13559337 | 402402 | 100.000 | 100.000  |

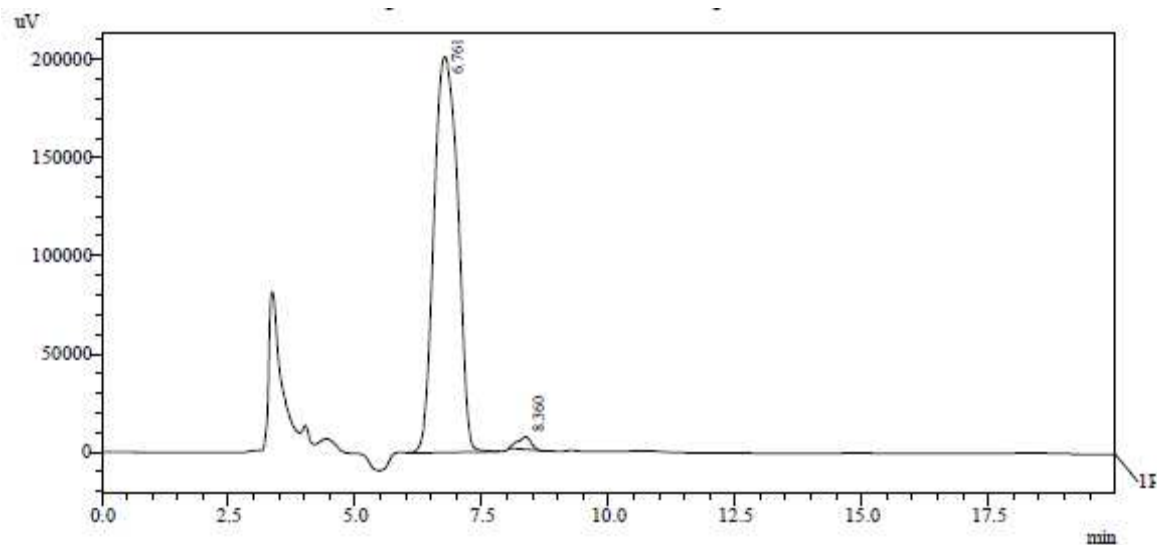

1 PDA Multi 1 / 210nm 4nm

PeakTable

PDA Ch1 210nm 4nm

| Peak# | Ret. Time | Area    | Height | Area %  | Height % |
|-------|-----------|---------|--------|---------|----------|
| 1     | 6.761     | 6584451 | 201458 | 98.214  | 96.905   |
| 2     | 8.360     | 119717  | 6434   | 1.786   | 3.095    |
| Total |           | 6704168 | 207892 | 100.000 | 100.000  |
